# Supplementary material for: Novel mutations in the kinase domain of BCR-ABL gene causing imatinib resistance in chronic myeloid leukemia patients
Source: PubMed Central journal article supplement (PMC6382822; doi:10.1038/s41598-019-38672-x), 2019-02-20
Supplement: 41598_2019_38672_MOESM1_ESM.pdf [file 41598_2019_38672_MOESM1_ESM.pdf]

## **Supplementary Information**

### **Novel mutations in the kinase domain of BCR-ABL gene cause imatinib resistance in chronic myeloid leukemia patients**

Chodimella Chandrasekhar, Pasupuleti Santhosh Kumar, Potukuchi Venkata Gurunadha  
Krishna Sarma

### **Inventory of Supplementary Information**

Supplementary Table 1

Supplementary Figures 1-64

**Supplementary Table 1. Superimposition of wild-type ABL structure (Green color) and mutated (Different colors) ABL structures.**

| Mutated ABL   | Superimposed structure                                                               | RMSD (Å) |
|---------------|--------------------------------------------------------------------------------------|----------|
| p.(Glu281*)   | 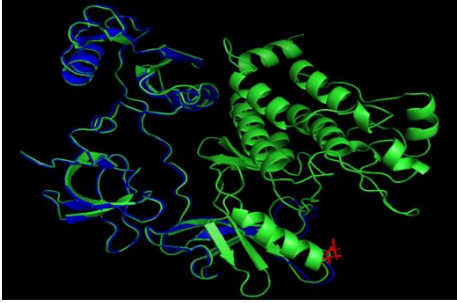   | 5.036    |
| p.(Tyr393*)   |   | 2.459    |
| p.(Asp381Asn) |  | 1.395    |
| p.(Glu373Asp) |  | 1.489    |
| p.(Phe317Leu) |  | 1.852    |

p.(Gly250Glu)

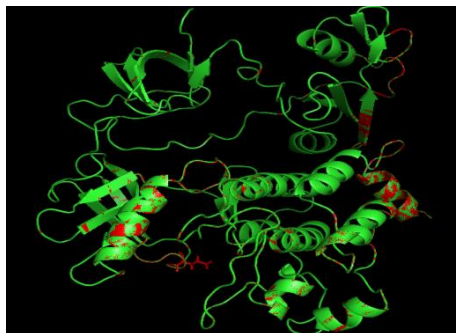

0.867

p.(Leu301Ile)

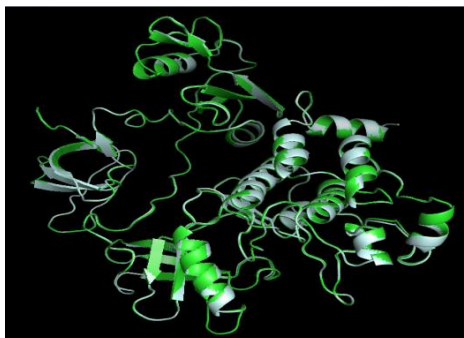

1.539

p.(Met351Thr)

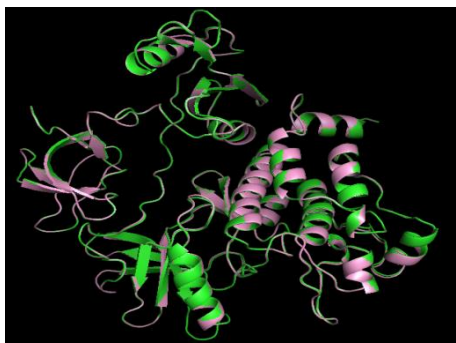

3.142

p.(Thr315Ile)

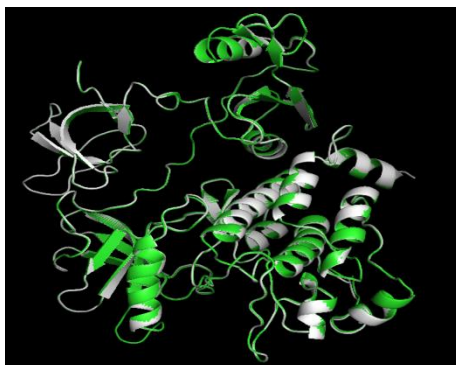

3.146

p.(Val256Gly)

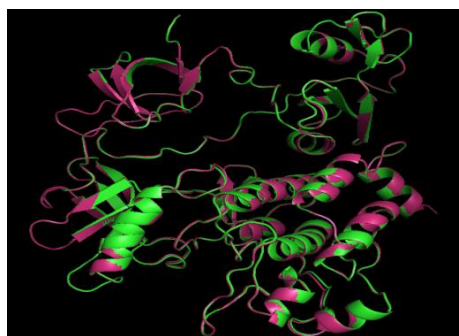

4.145

p.(Tyr253His)

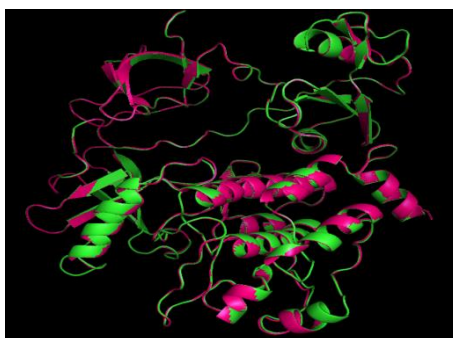

1.538

p.(Tyr320His)

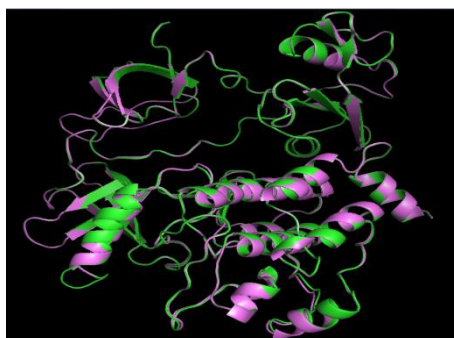

1.615

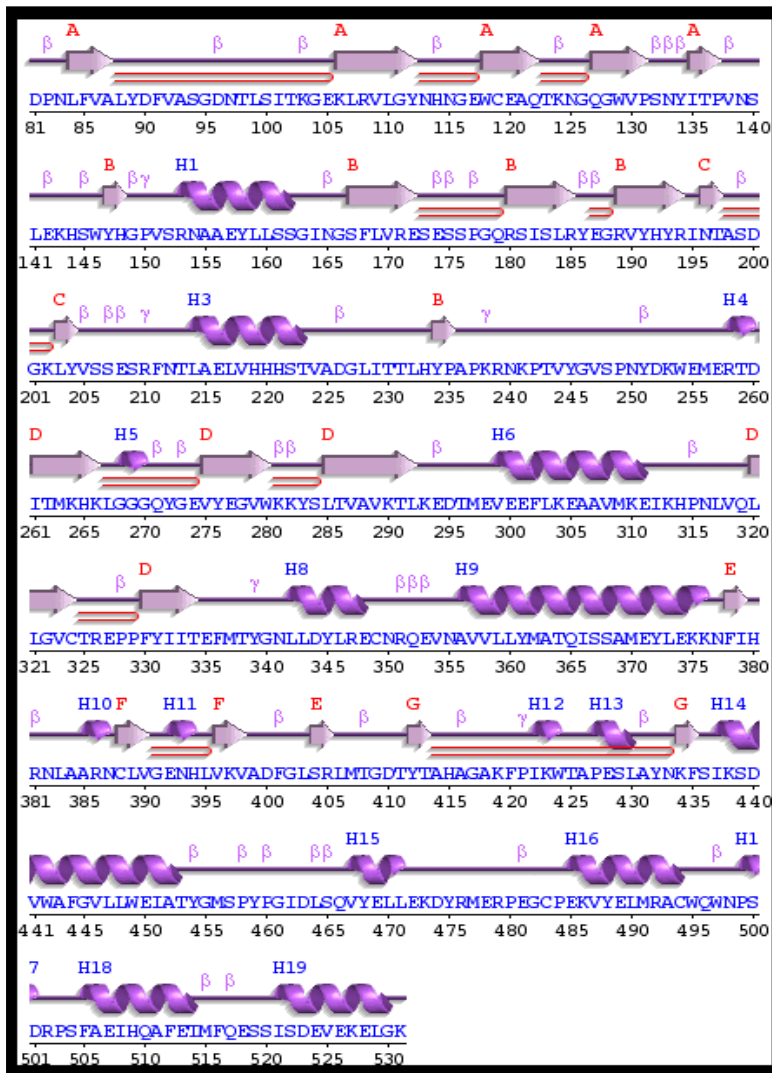

**Supplementary Figure S1:** Secondary structural conformation of wild-type ABL structure.

**Keys:**

Secondary structure:  Helices labeled as H1, H2, and strands by their sheets A, B.

 HelixStrand

Motifs:  $\beta$  beta turn  $\gamma$  gamma turn  beta hairpin

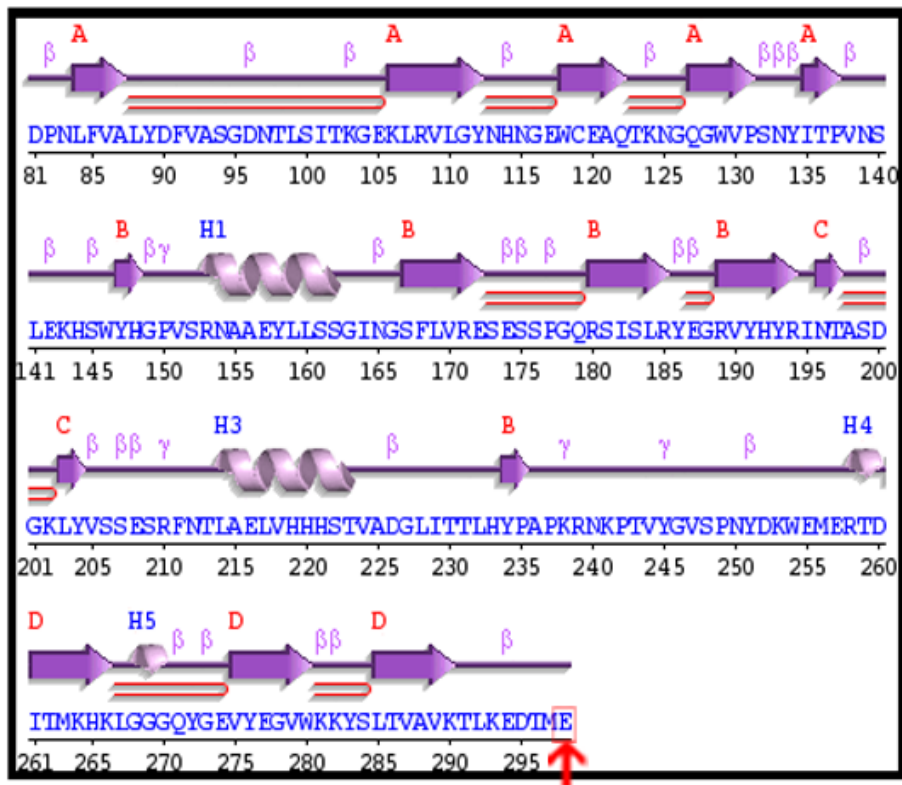

**Supplementary Figure S2:** Secondary structural conformation of mutant p.(Glu281\*) ABL structure. The mutated region p.(Glu281\*) was found to be localized in H5 helix (indicated in red arrow).

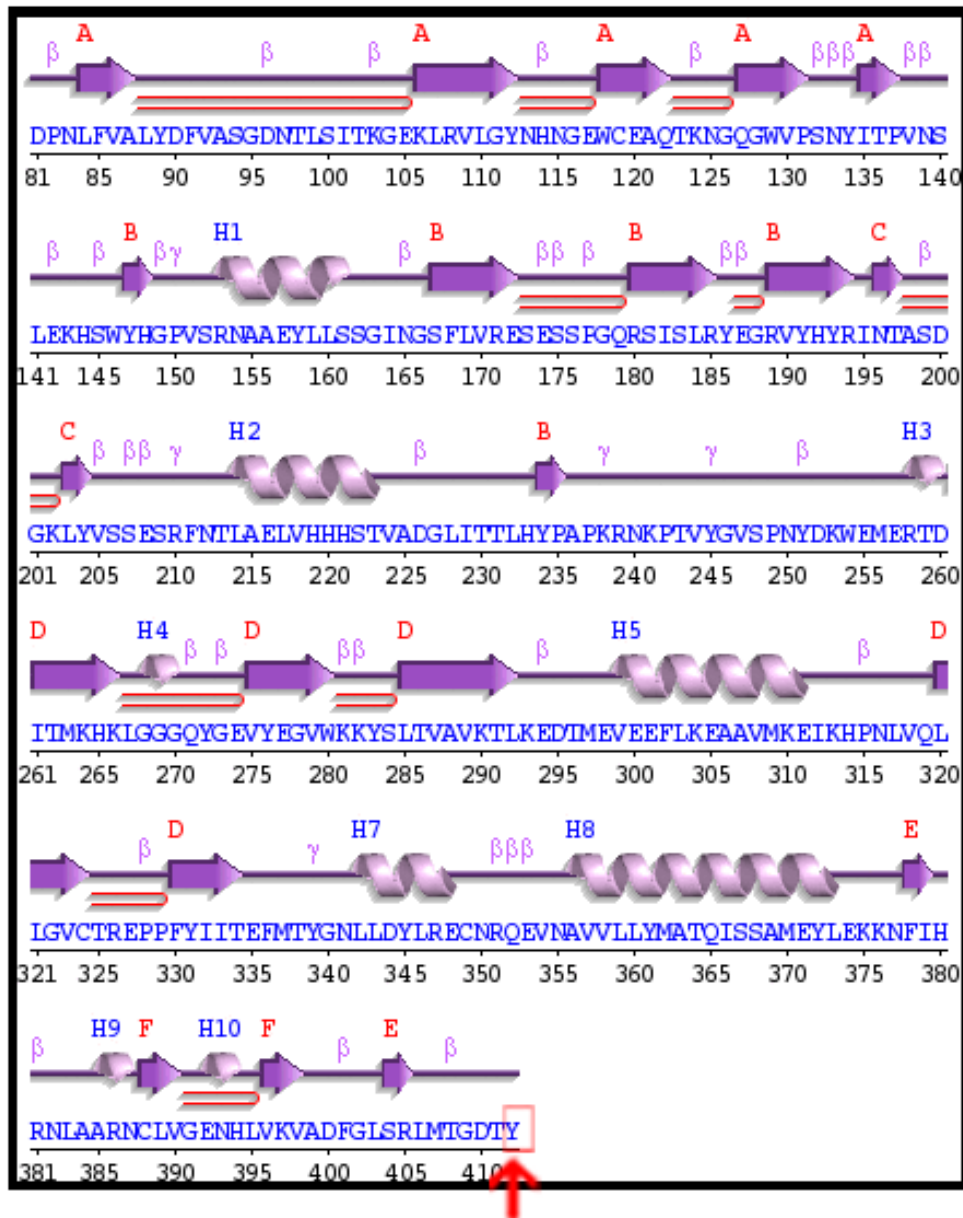

**Supplementary Figure S3:** Secondary structural conformation of mutant p.(Tyr393\*) ABL structure. The mutated region p.(Tyr393\*) was found to be localized in H10 helix (indicated in red arrow).

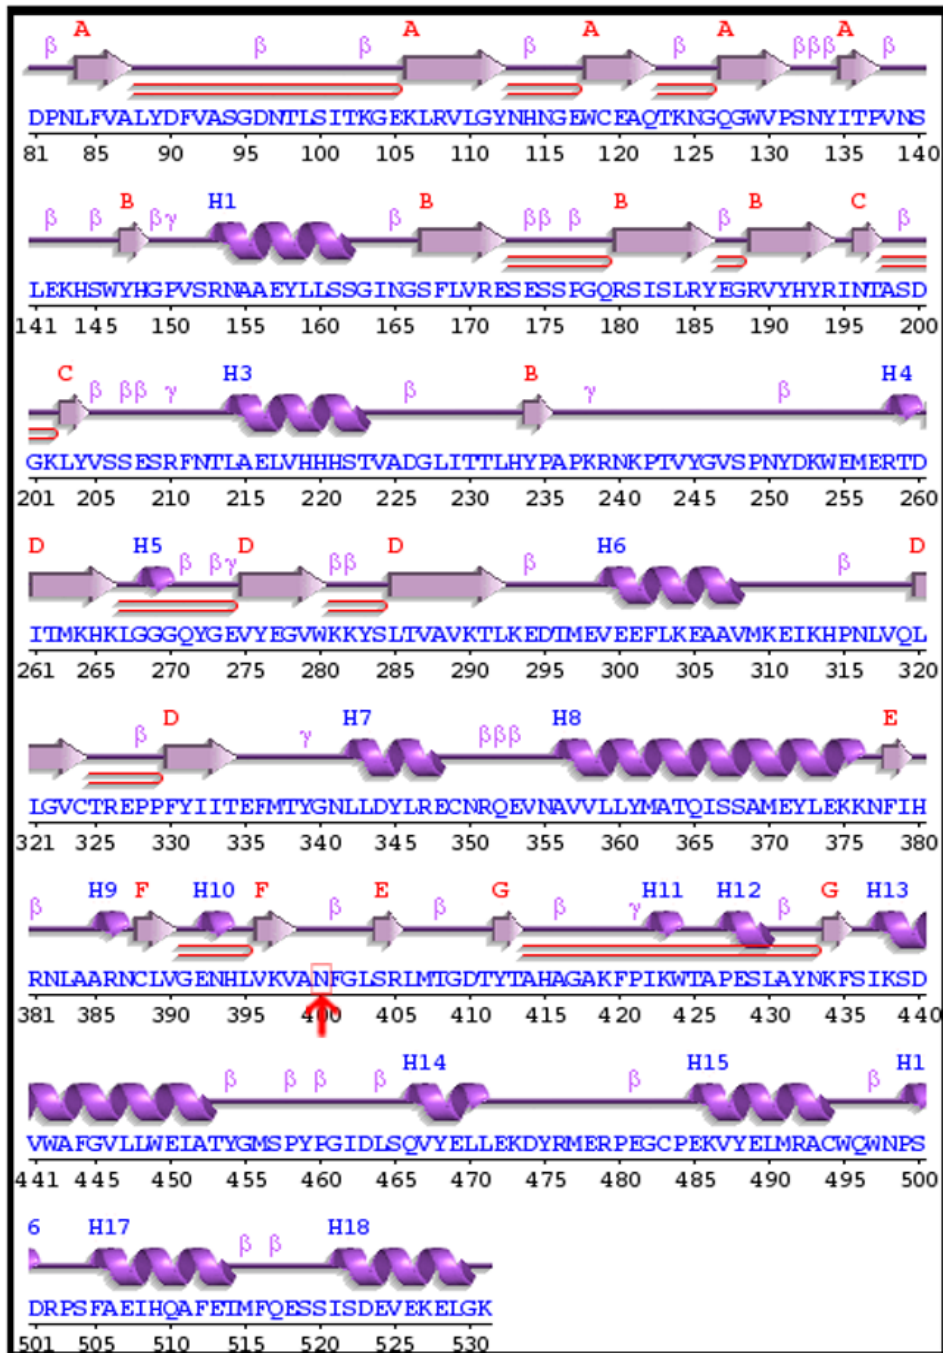

**Supplementary Figure S4:** Secondary structural conformation of mutant p.(Asp381Asn) ABL structure. The mutated region p.(Asp381Asn) was found to be localized in H10 helix (indicated in red arrow).



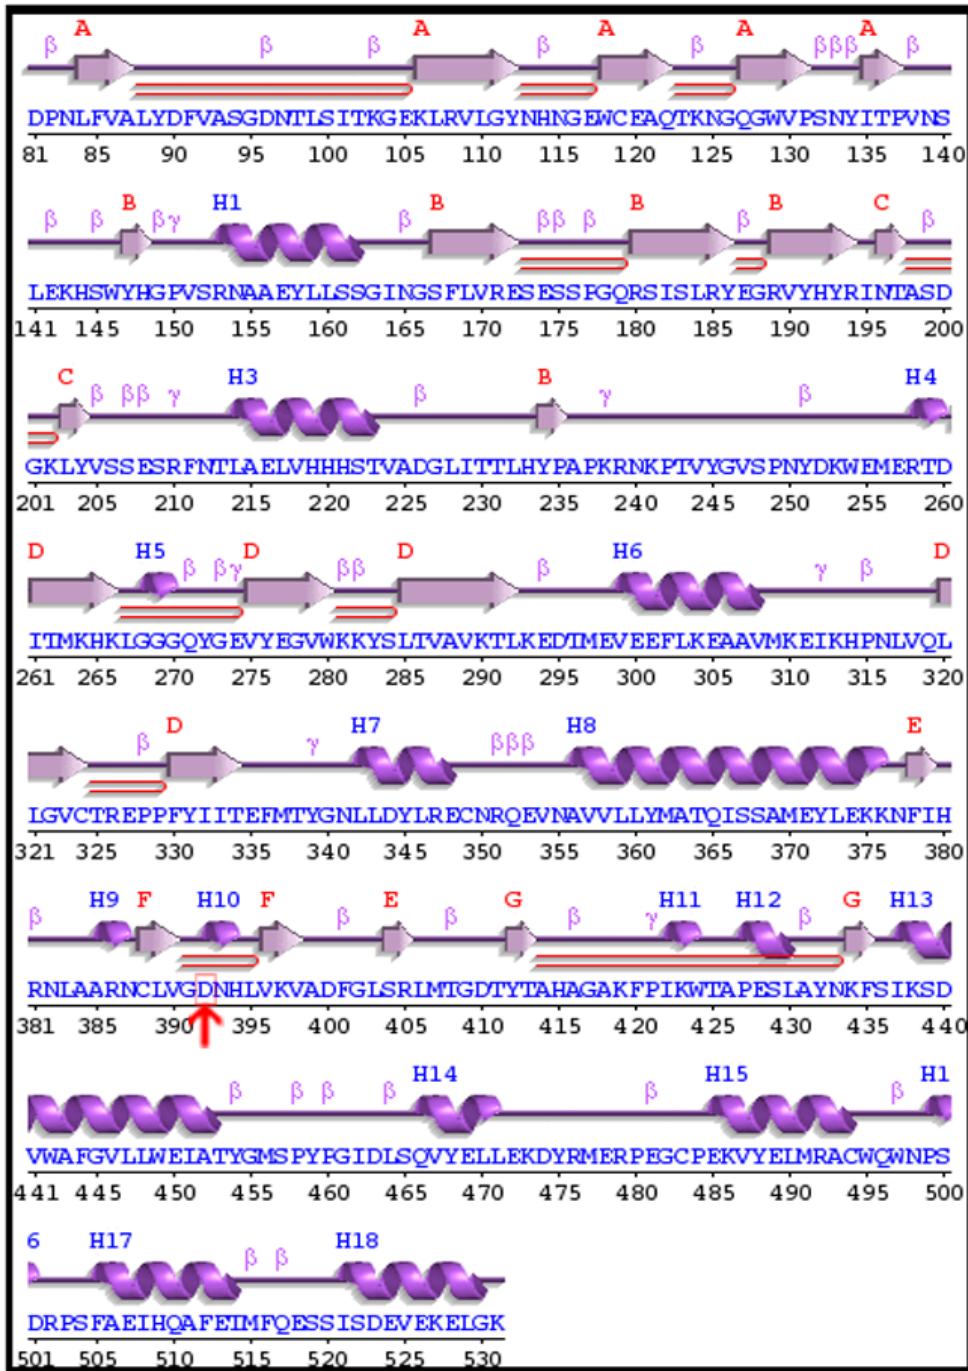

**Supplementary Figure S5:** Secondary structural conformation of mutant p.(Glu373Asp) ABL structure. The mutated region p.(Glu373Asp) was found to be localized in H10 helix (indicated in red arrow).

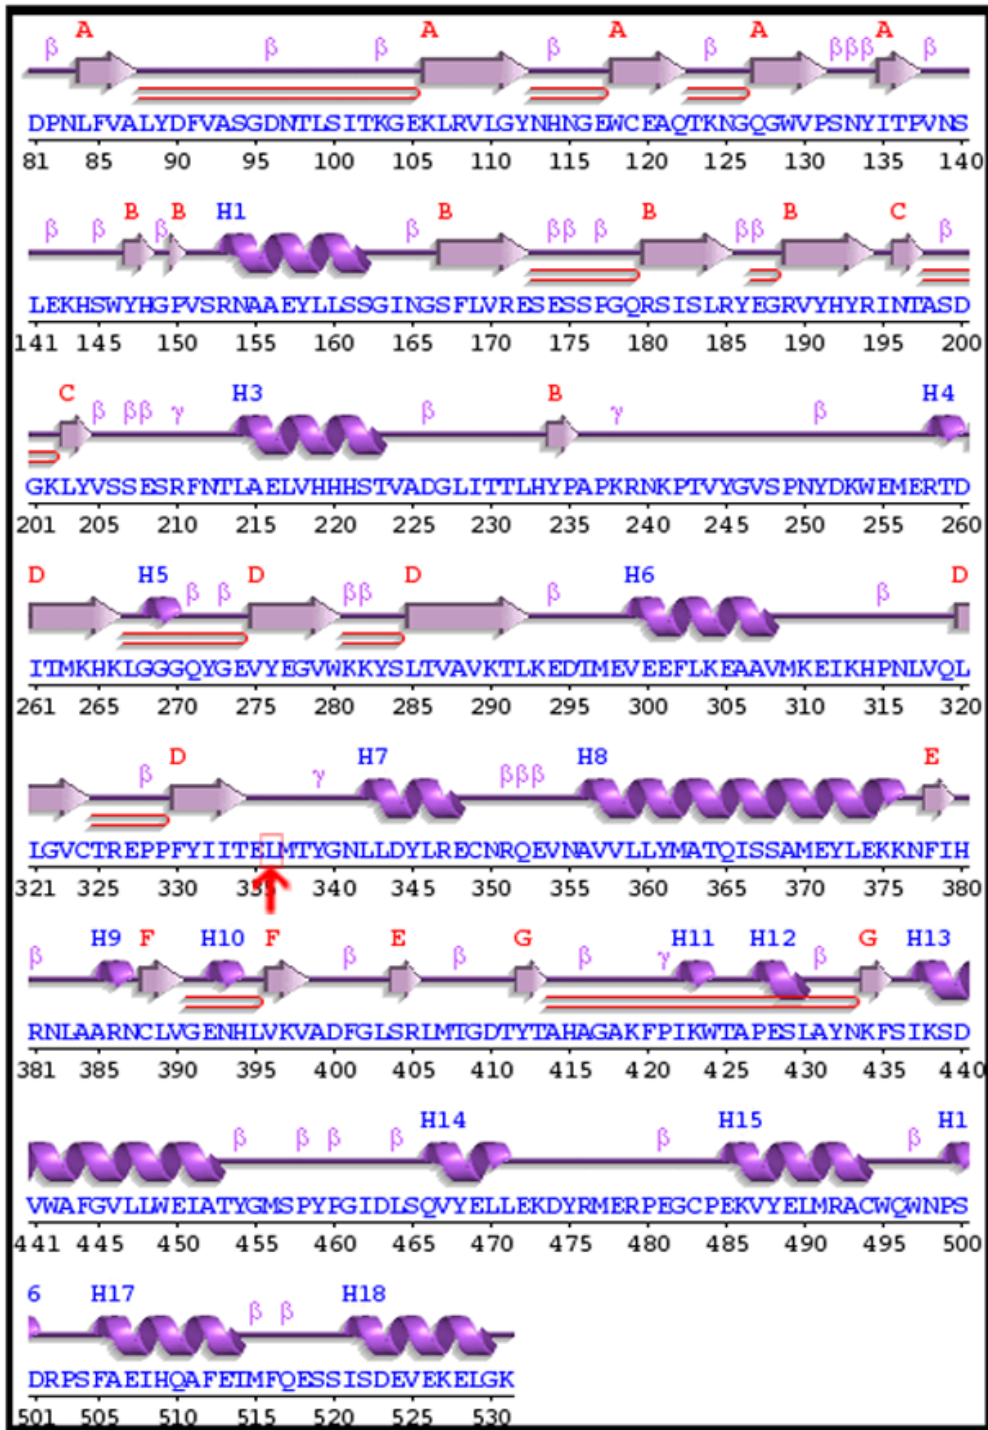

**Supplementary Figure S6:** Secondary structural conformation of mutant p.(Phe317Leu) ABL structure. The mutated region p.(Phe317Leu) was found to be localized in H6 helix (indicated in red arrow).

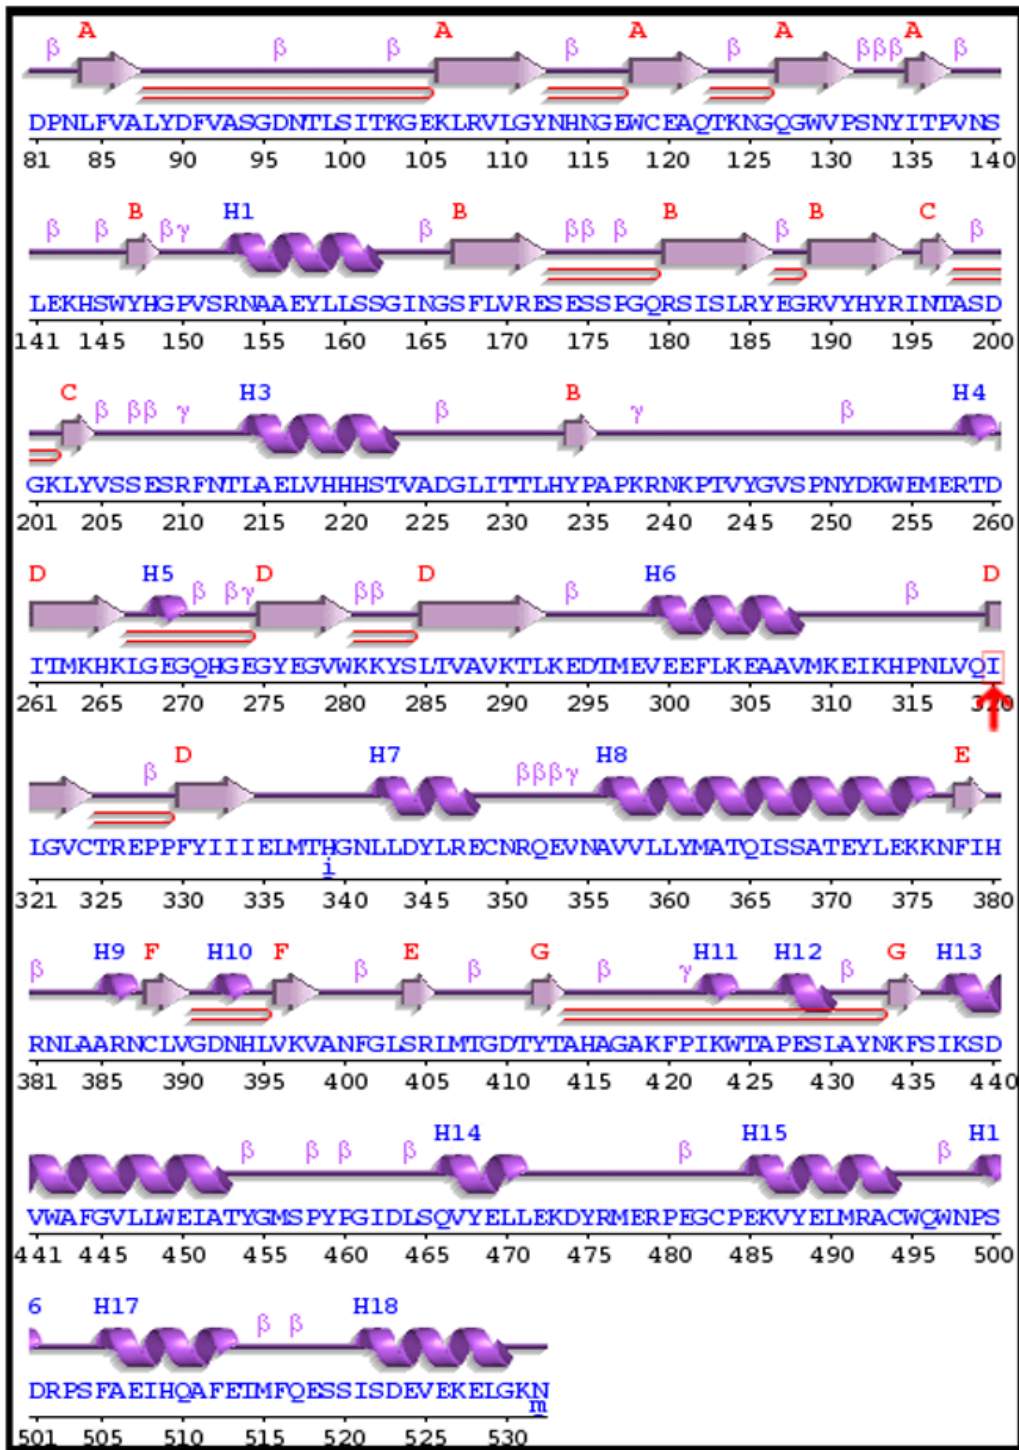

**Supplementary Figure S7:** Secondary structural conformation of mutant p.(Leu301Ile) ABL structure. The mutated region p.(Leu301Ile) was found to be localized in H6 helix (indicated in red arrow).

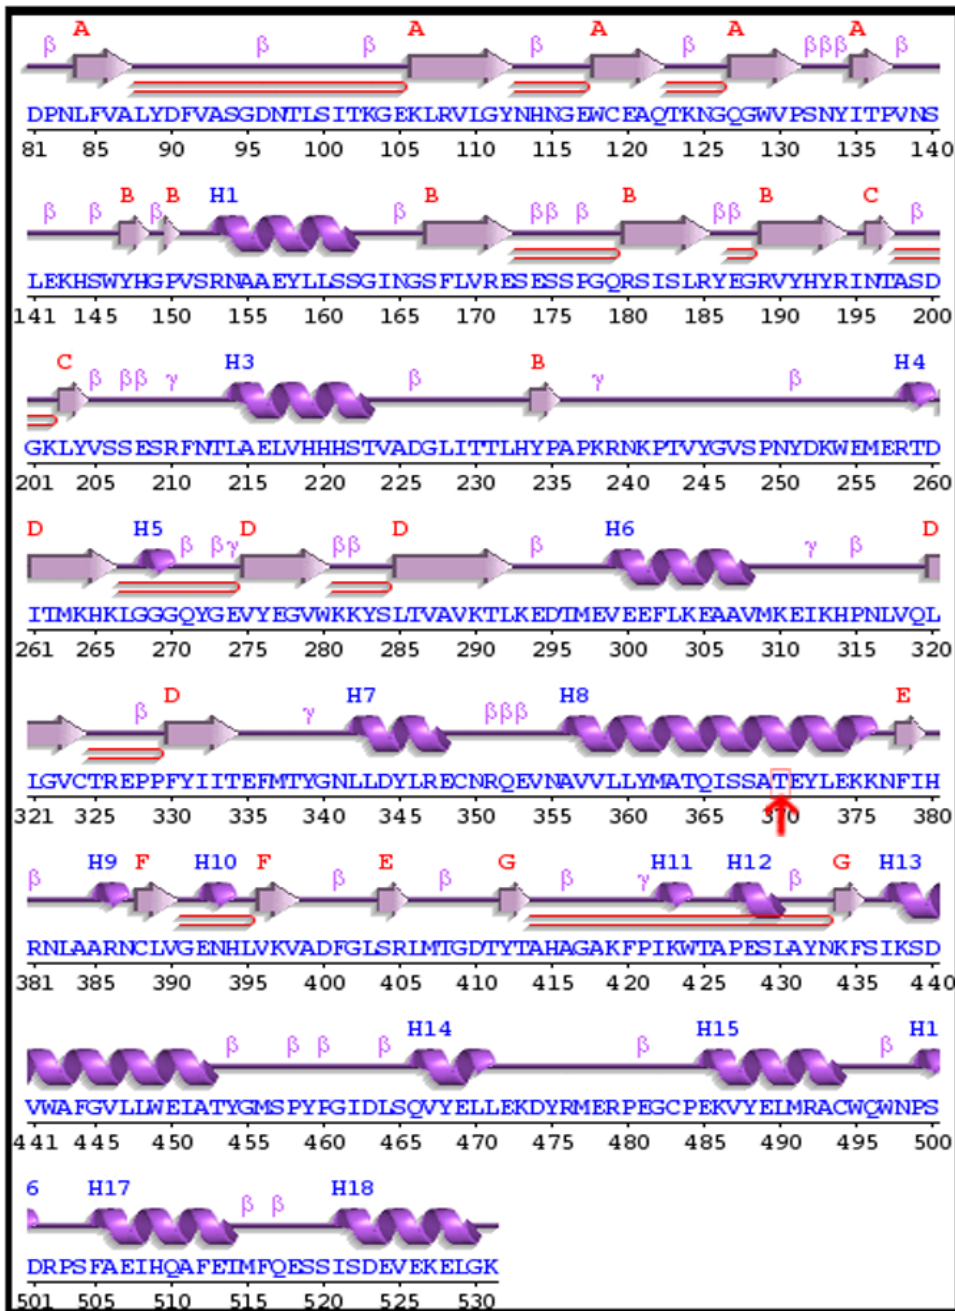

**Supplementary Figure S8:** Secondary structural conformation of mutant p.(Met351Thr) ABL structure. The mutated region p.(Met351Thr) was found to be localized in H8 helix (indicated in red arrow).

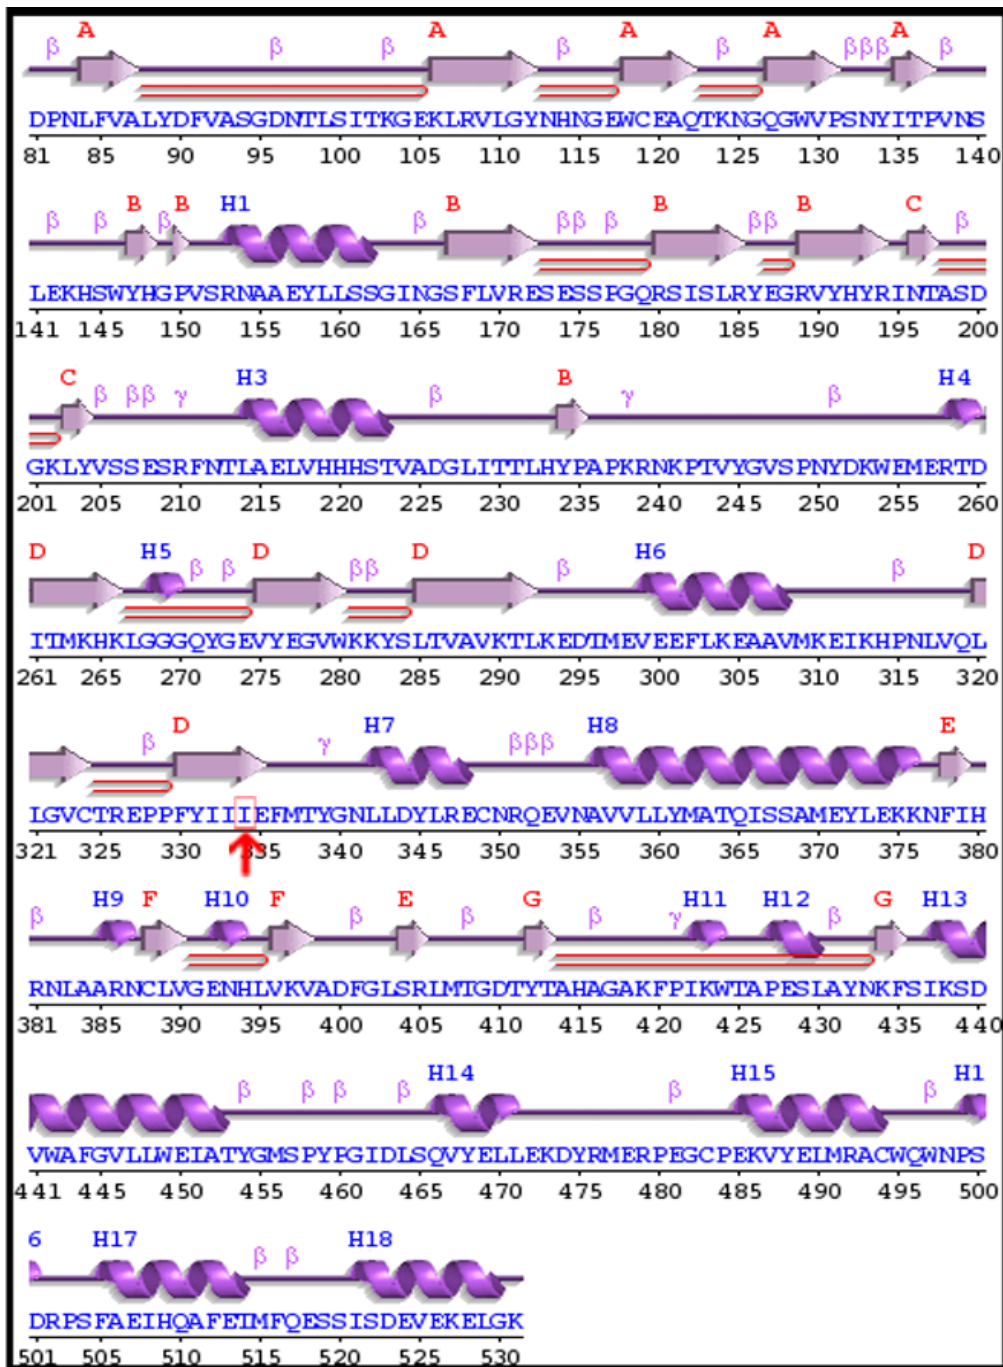

**Supplementary Figure S9:** Secondary structural conformation of mutant p.(Thr315Ile) ABL structure. The mutated region p.(Thr315Ile) was found to be localized in H6 helix (indicated in red arrow).



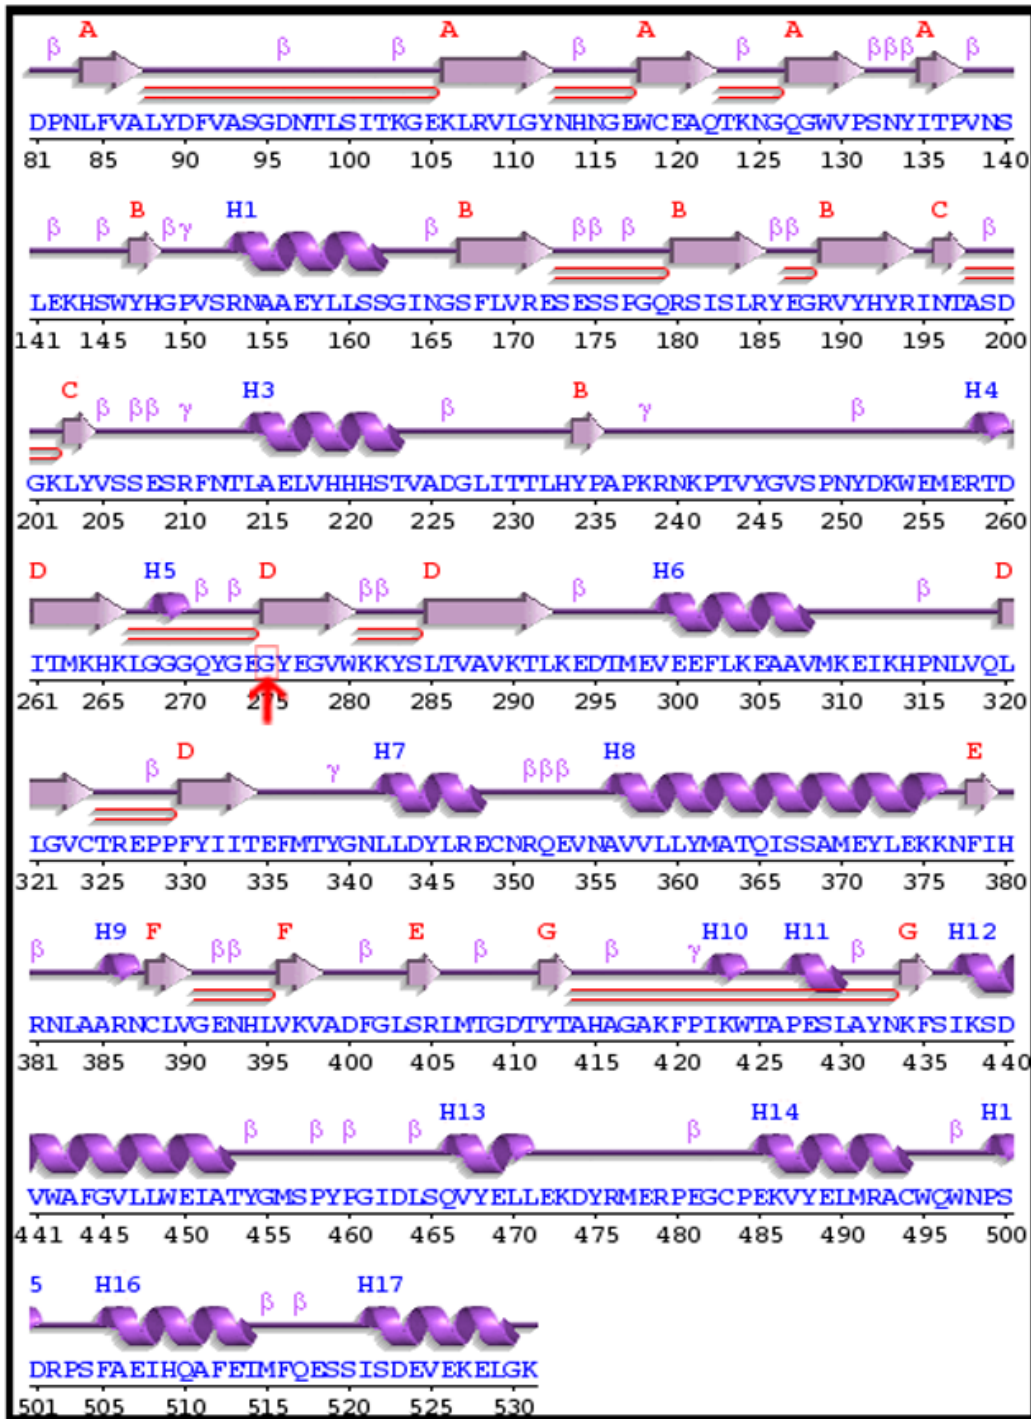

**Supplementary Figure S10:** Secondary structural conformation of mutant p.(Val256Gly) ABL structure. The mutated region p.(Val256Gly) was found to be localized in H5 helix (indicated in red arrow).

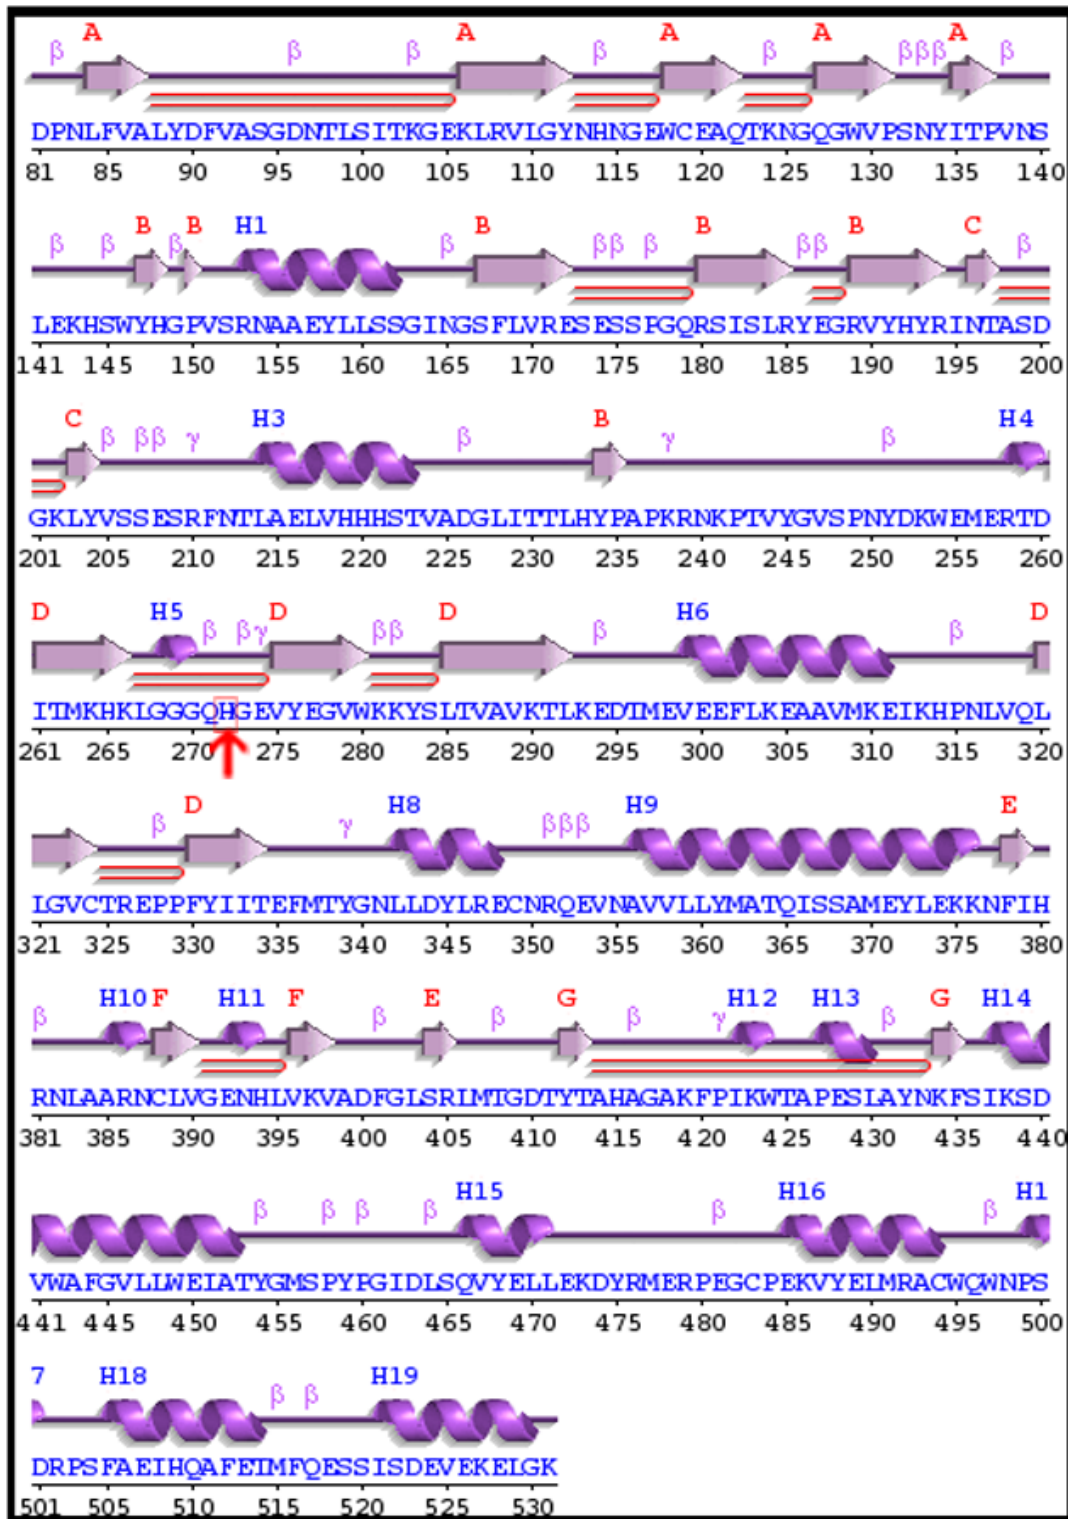

**Supplementary Figure S11:** Secondary structural conformation of mutant p.(Tyr253His) ABL structure. The mutated region p.(Tyr253His) was found to be localized in H5 helix (indicated in red arrow).

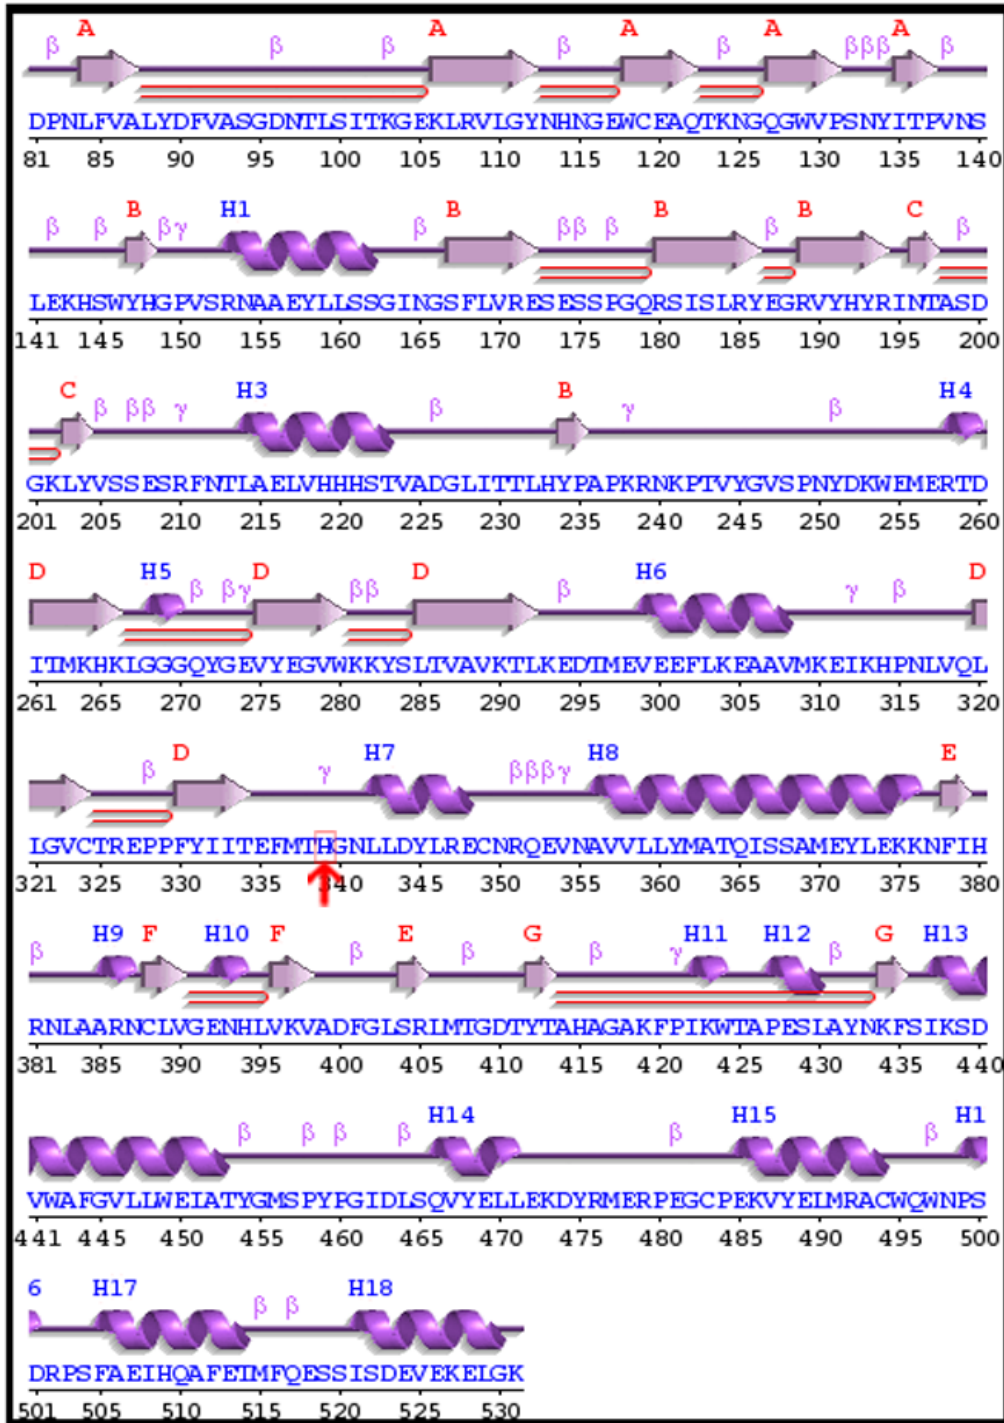

**Supplementary Figure S12:** Secondary structural conformation of p.(Tyr320His) ABL structure. The mutated region p.(Tyr320His) was found to be localized in H6 helix (indicated in red arrow).



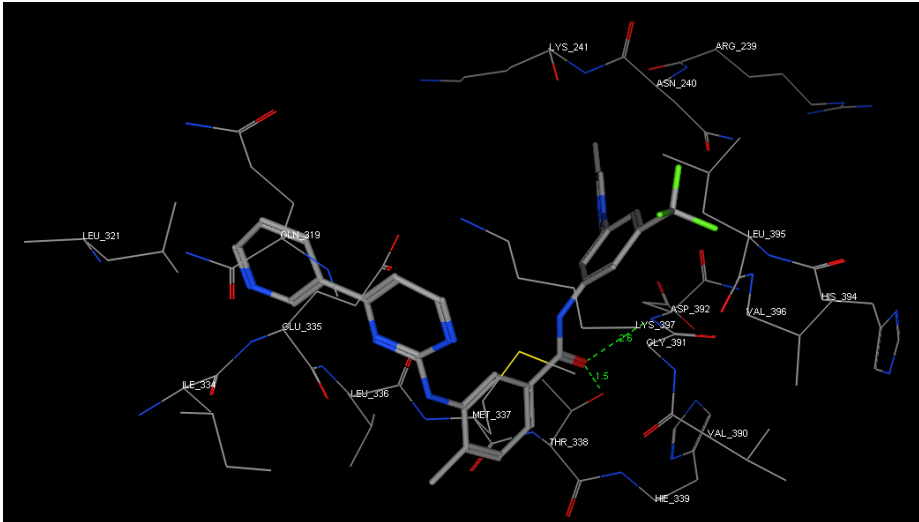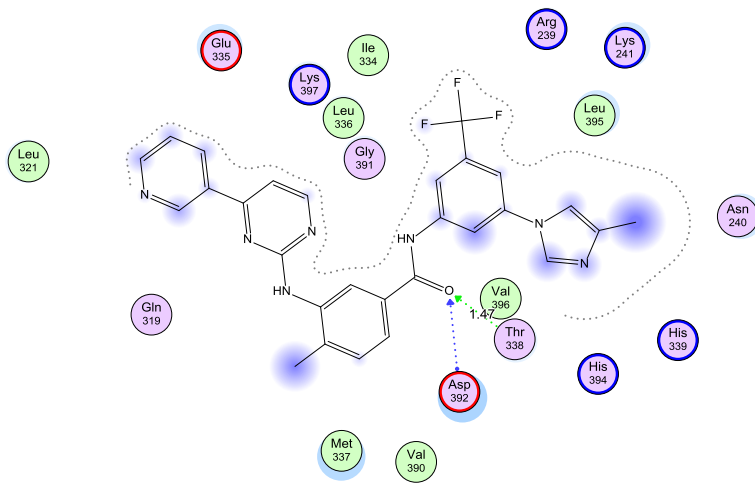

**Supplementary Figure S13.** Docking of Wild-type ABL structure with Nilotinib.



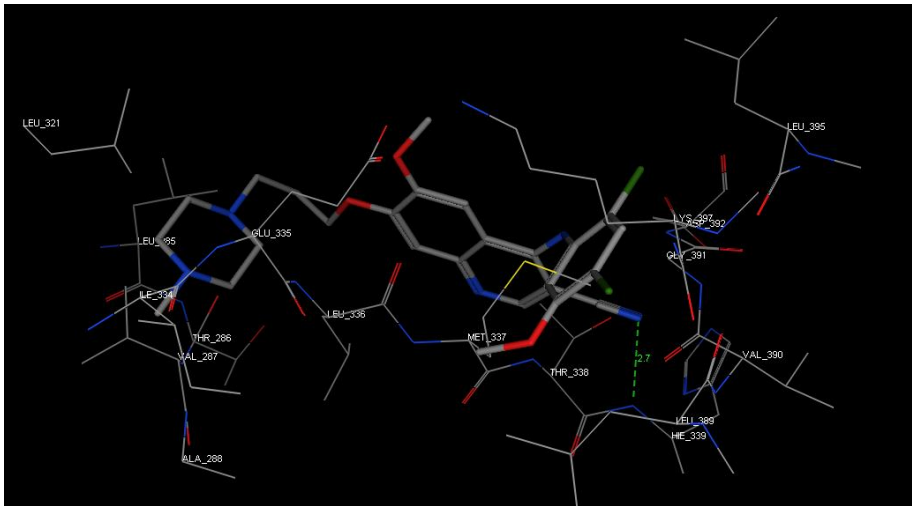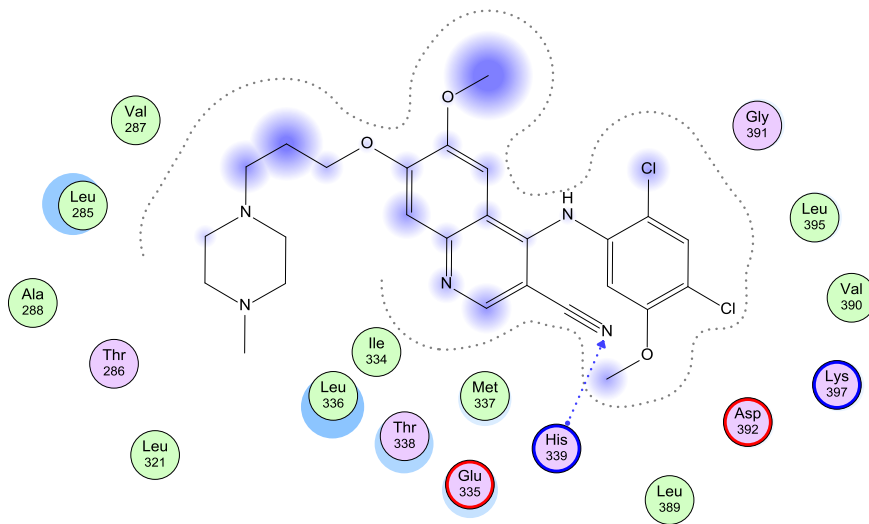

**Supplementary Figure S15.** Docking of Wild-type ABL structure with Bosutinib.

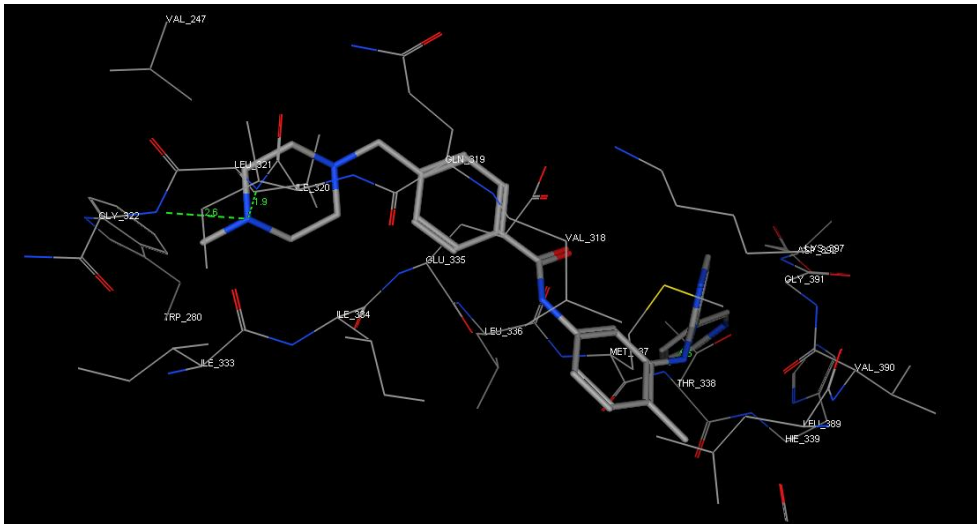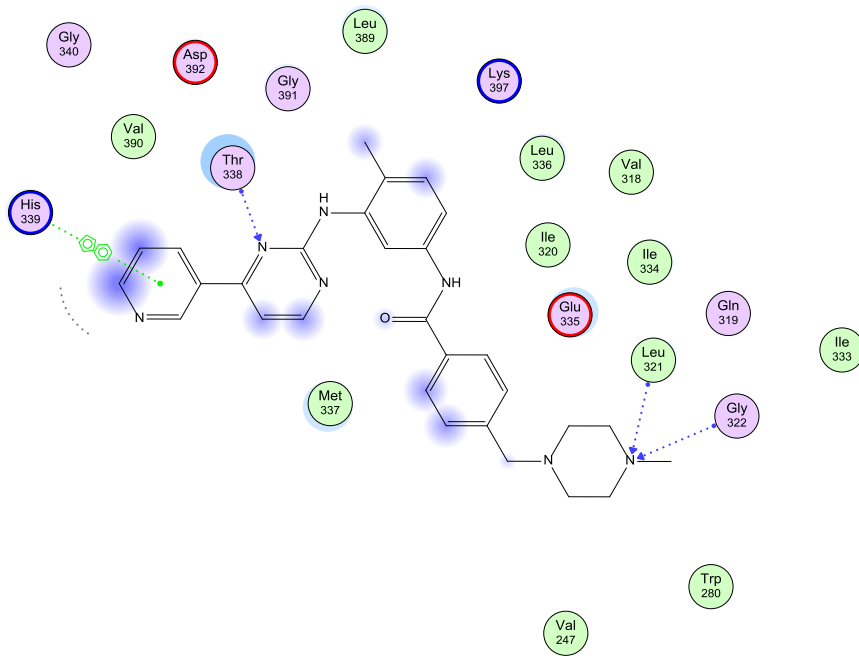

**Supplementary Figure S16.** Docking of Wild-type ABL structure with Imatinib.

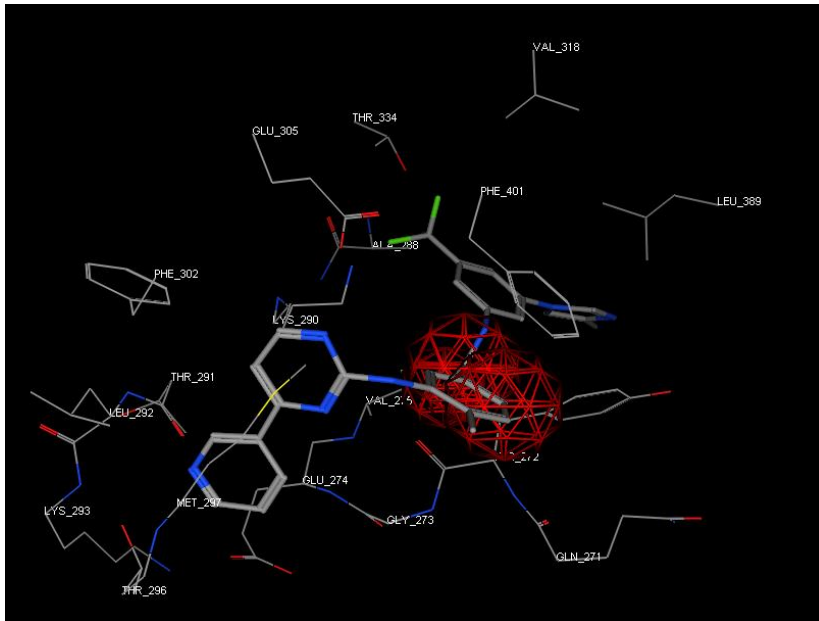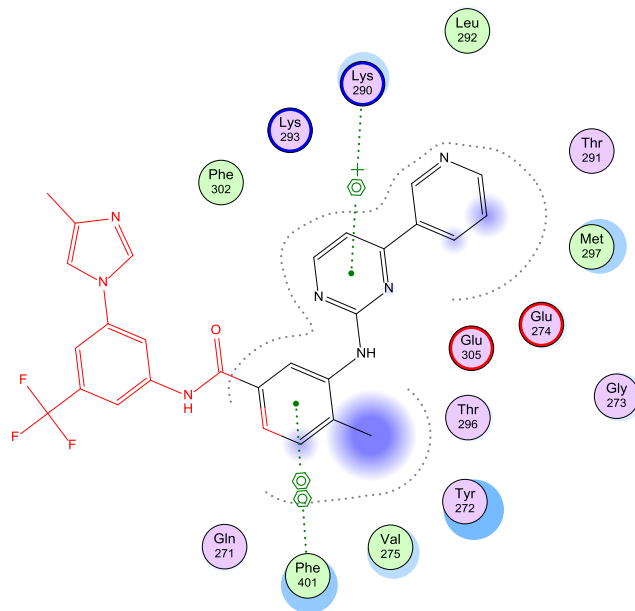

**Supplementary Figure S17.** Docking of p.(Asp381Asn) mutant ABL structure with Nilotinib.

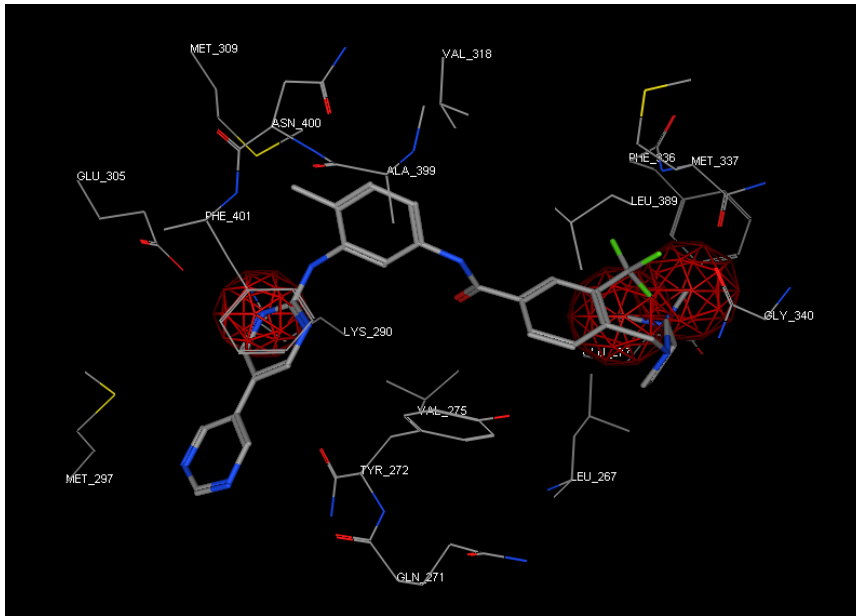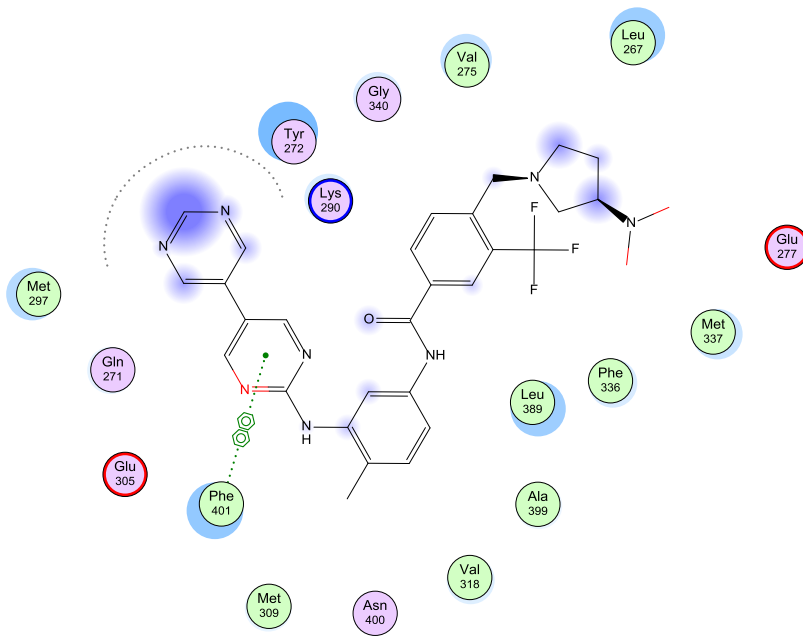

**Supplementary Figure S18.** Docking of p.(Asp381Asn) mutant ABL structure with Bafetinib.

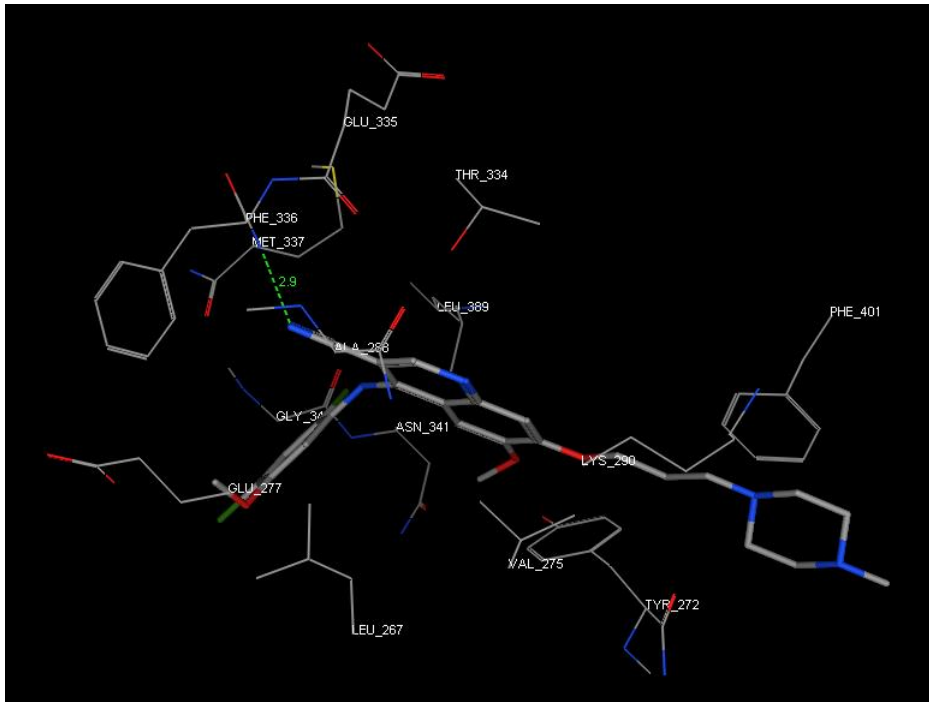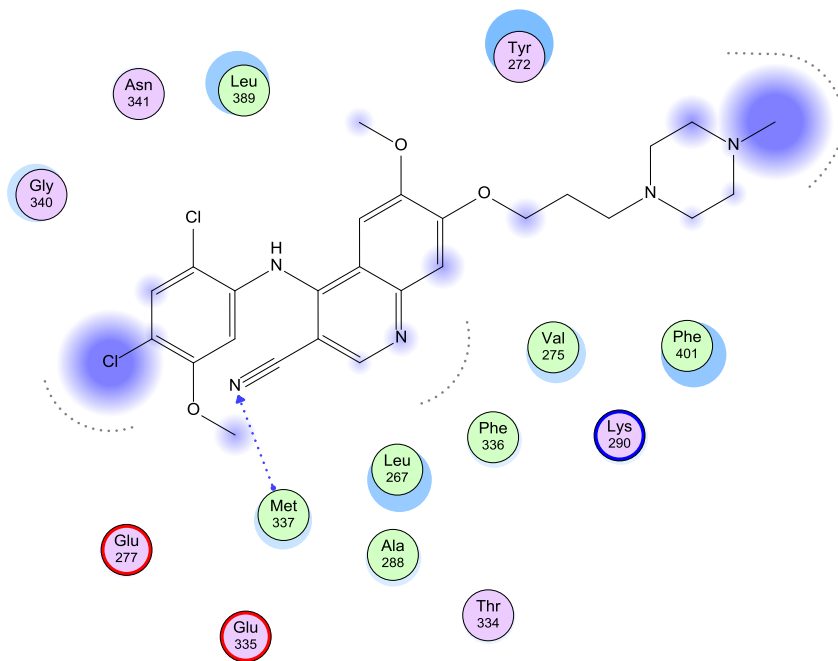

**Supplementary Figure S19.** Docking of p.(Asp381Asn) mutant ABL structure with Bosutinib.

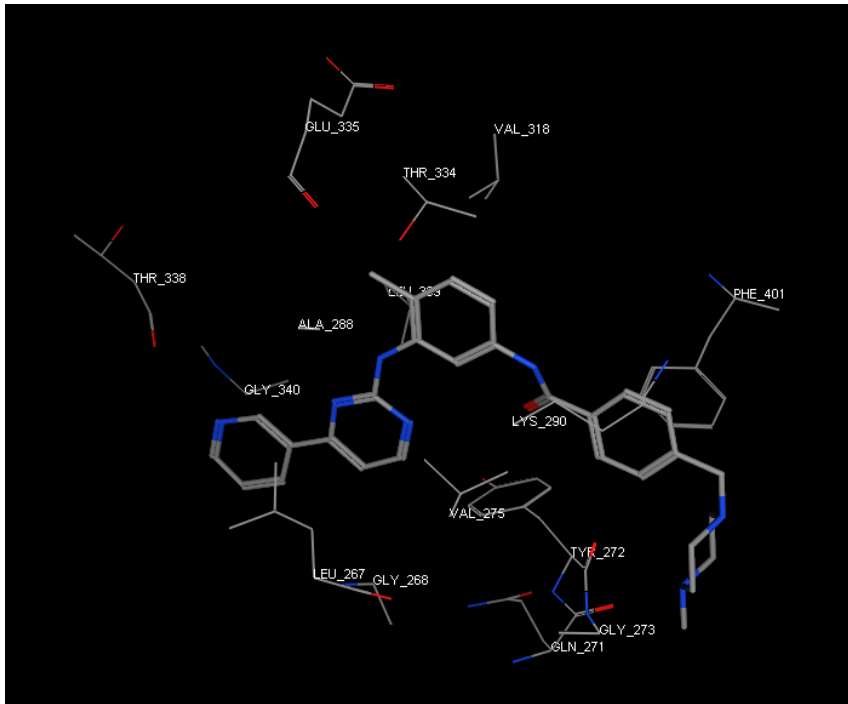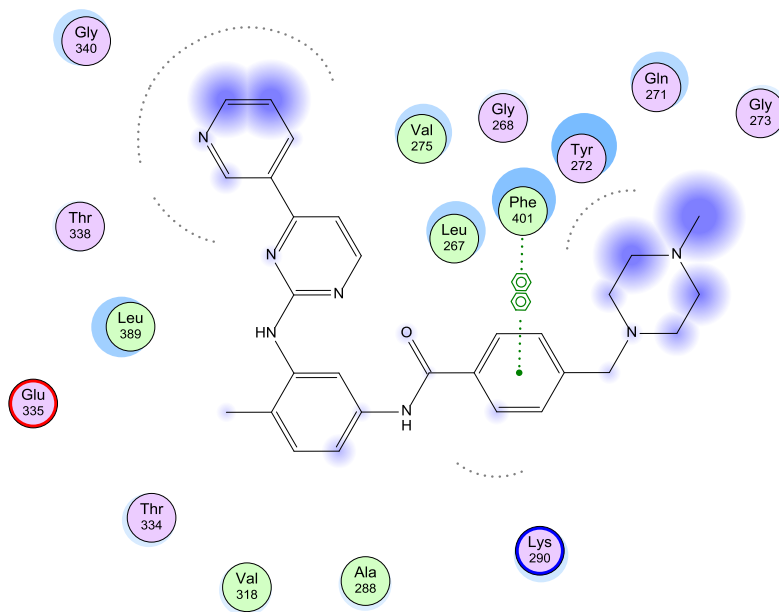

**Supplementary Figure S20.** Docking of p.(Asp381Asn) mutant ABL structure with Imatinib.



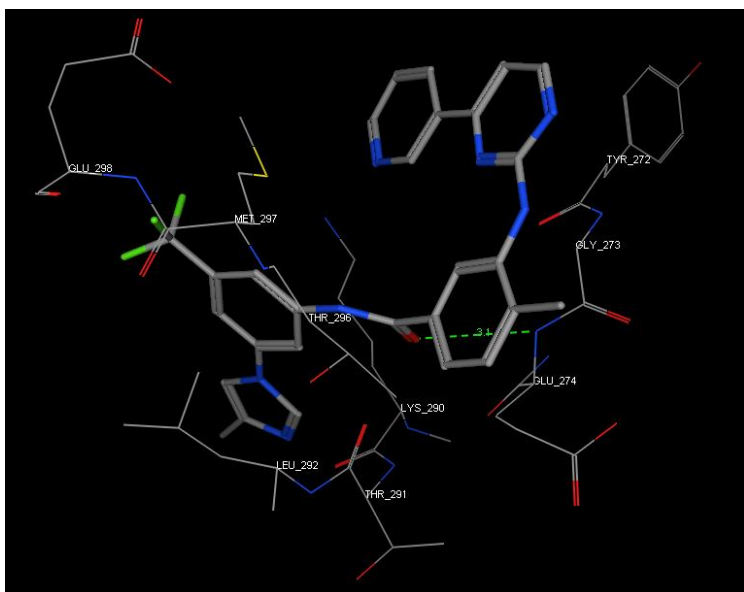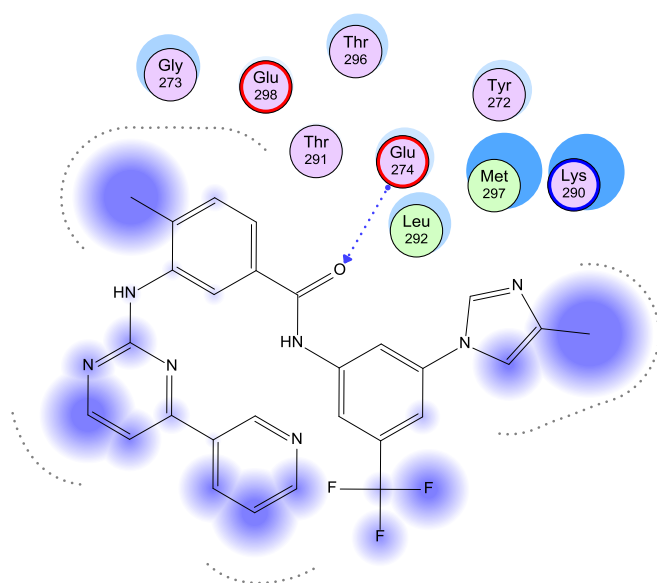

**Supplementary Figure S21.** Docking of p.(Glu281\*) mutant ABL structure with Nilotinib.

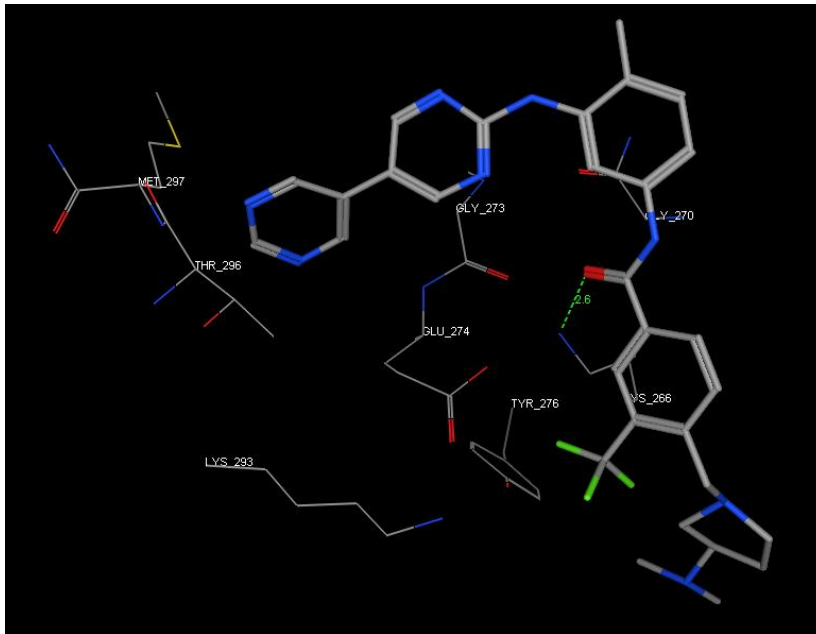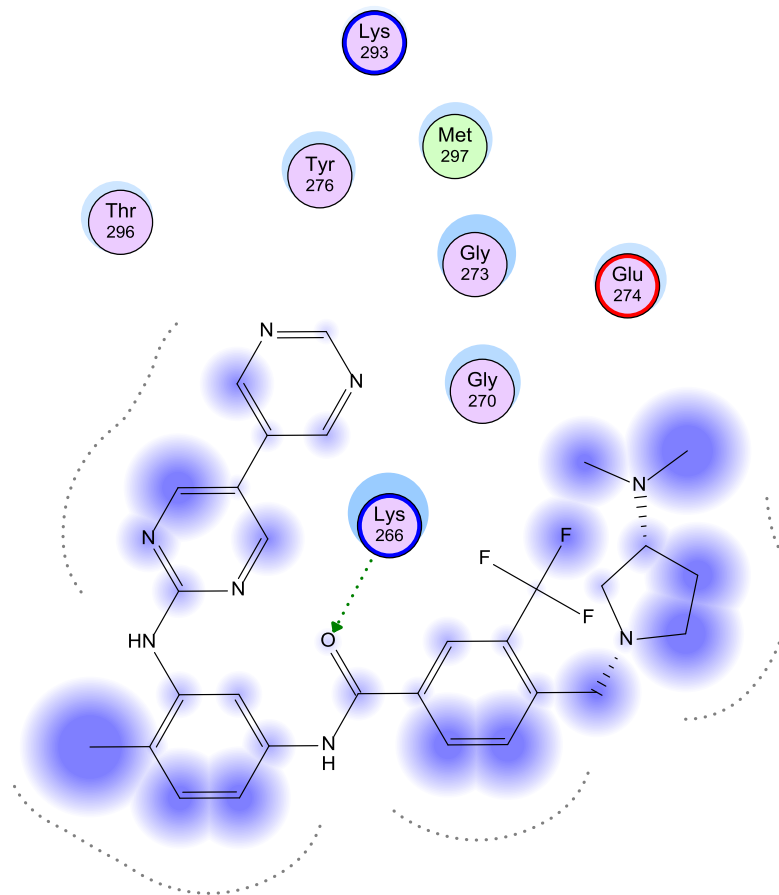

**Supplementary Figure S22.** Docking of p.(Glu281\*) mutant ABL structure with Bafetinib.

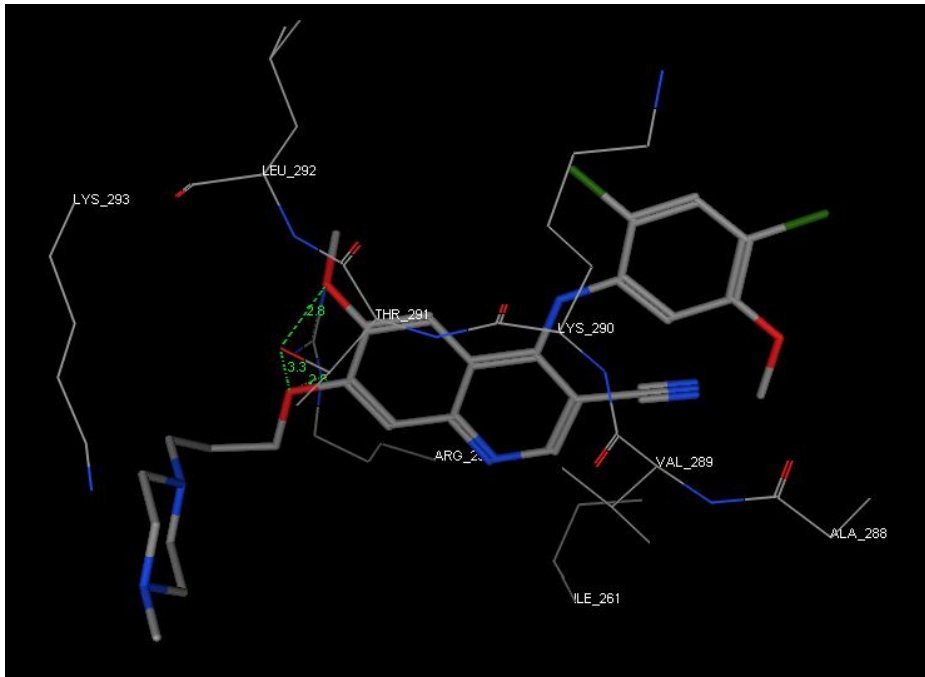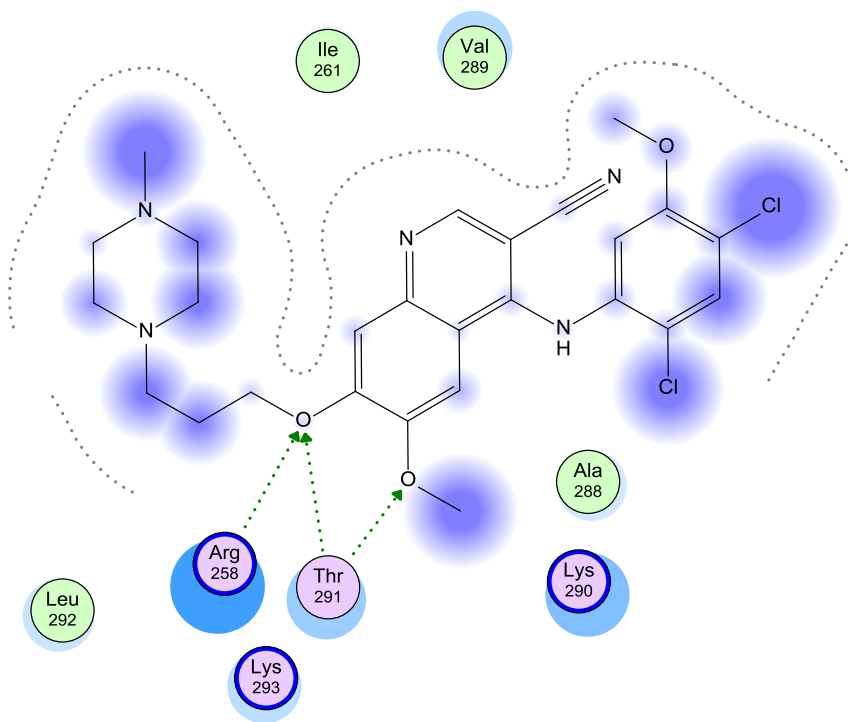

**Supplementary Figure S23.** Docking of p.(Glu281\*) mutant ABL structure with Bosutinib.

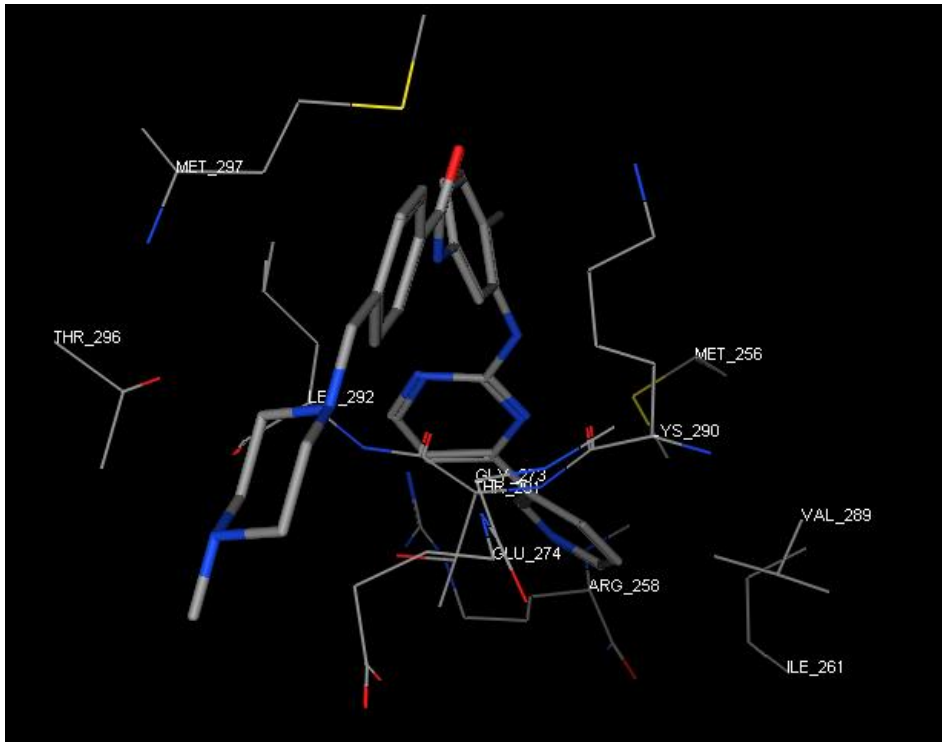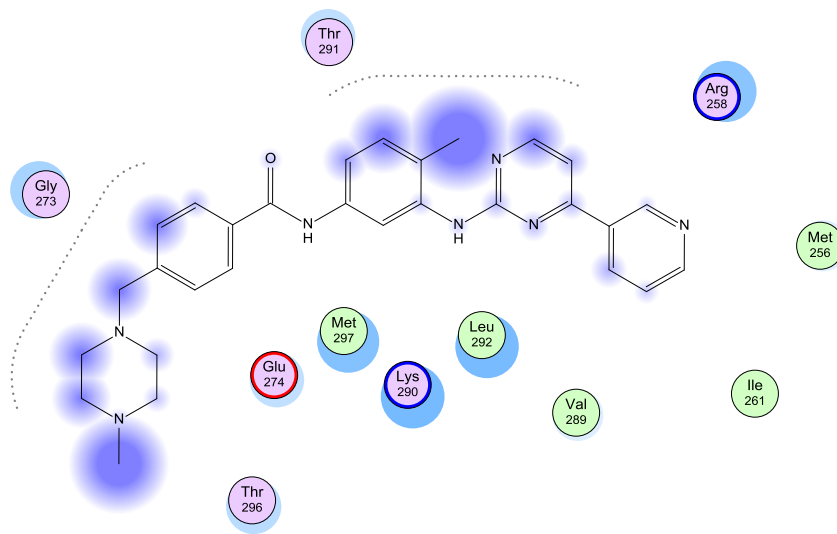

**Supplementary Figure S24.** Docking of p.(Glu281\*) mutant ABL structure with Imatinib.

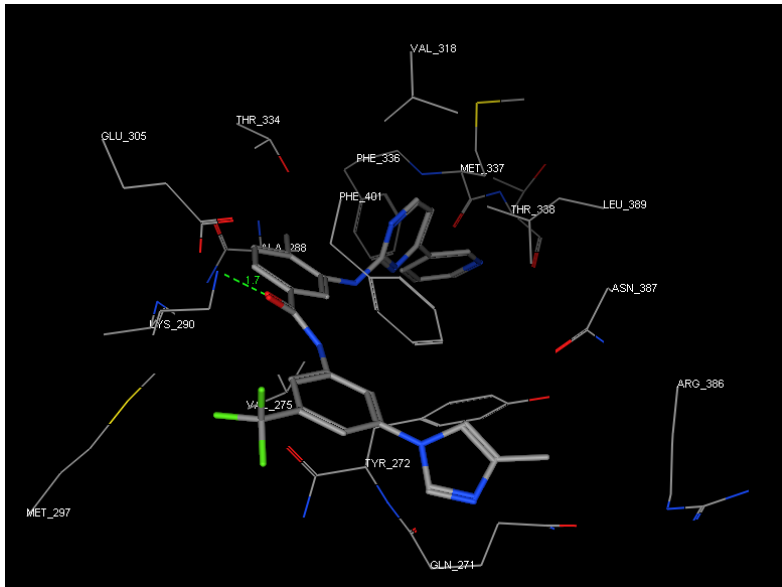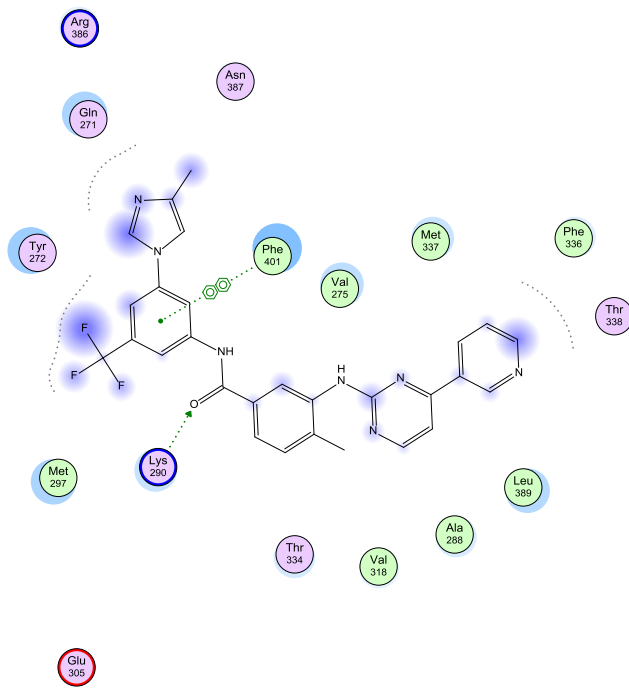

**Supplementary Figure S25.** Docking of p.(Glu373Asp) mutant ABL structure with Nilotinib.

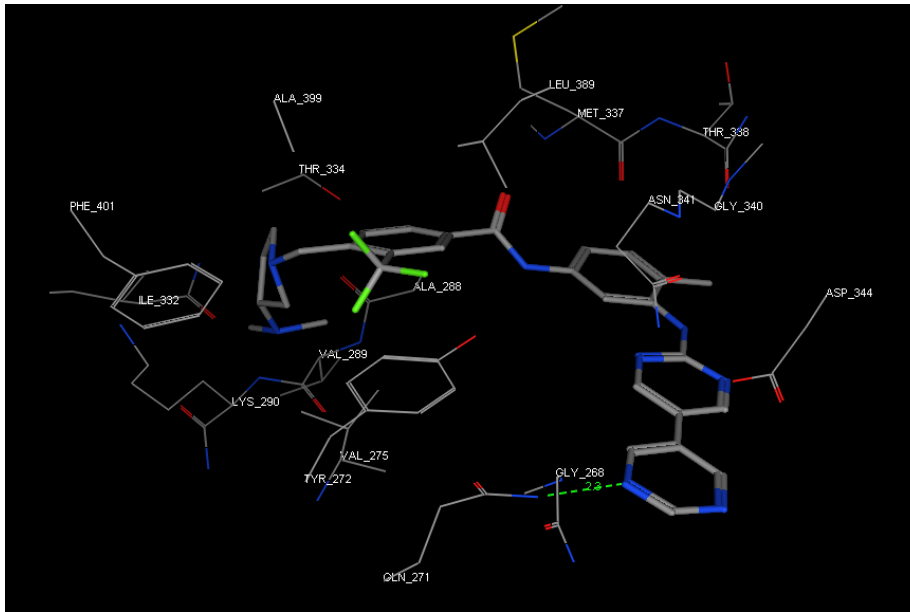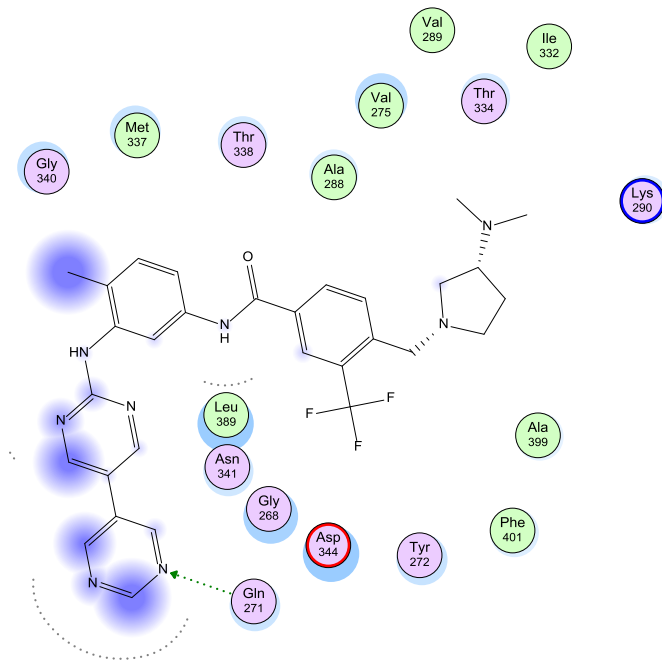

**Supplementary Figure S26.** Docking of p.(Glu373Asp) mutant ABL structure with Bafetinib.

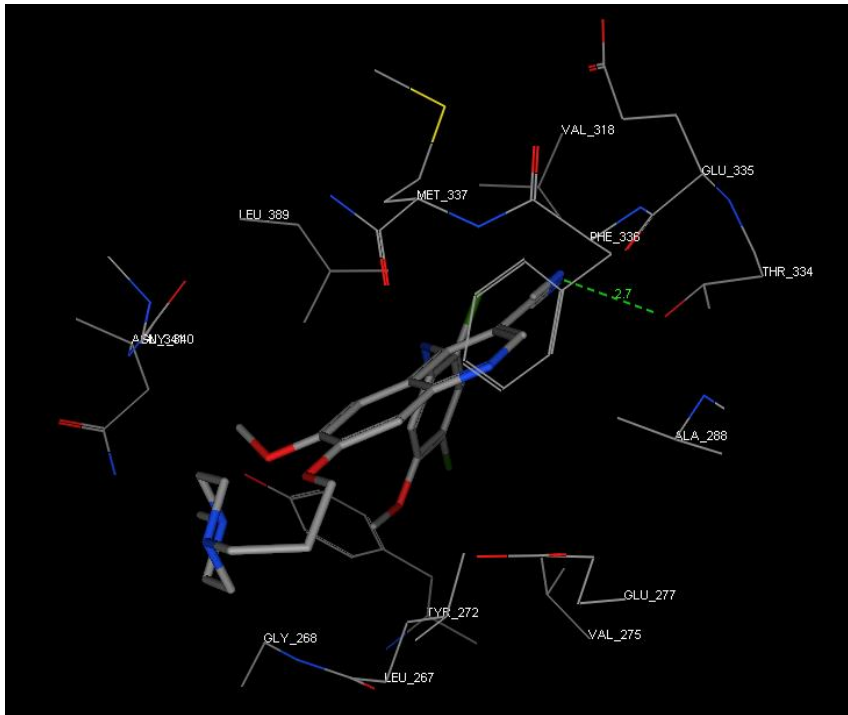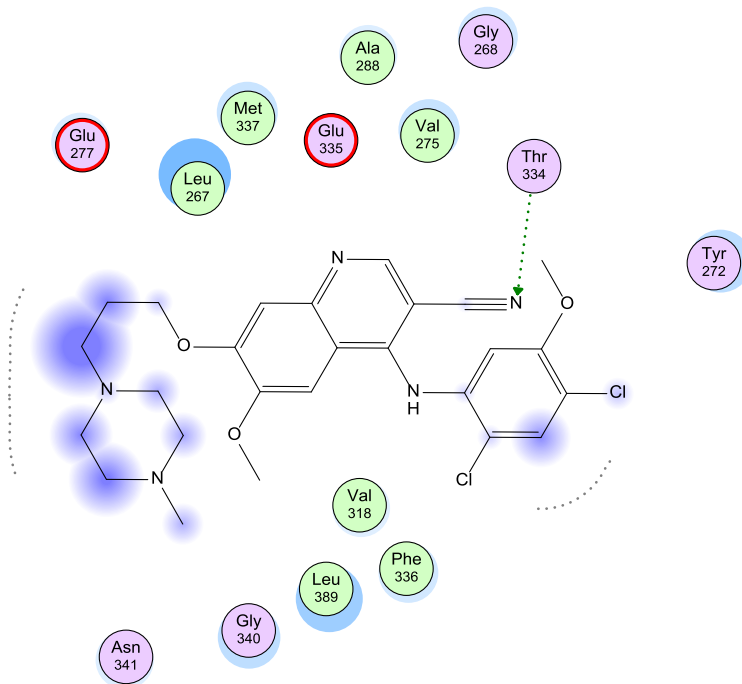

**Supplementary Figure S27.** Docking of p.(Glu373Asp) mutant ABL structure with Bosutinib.

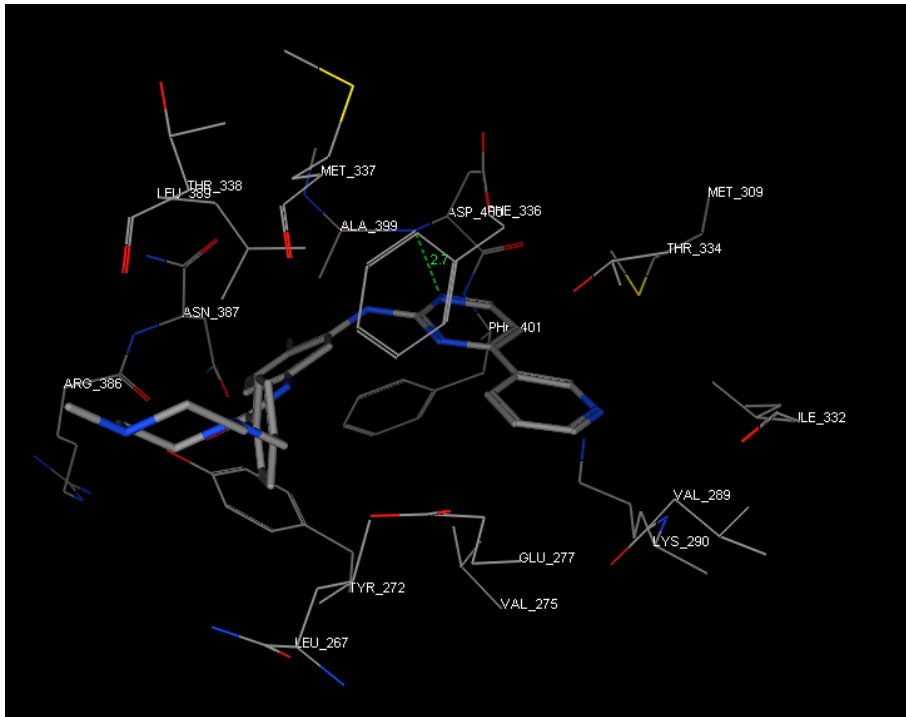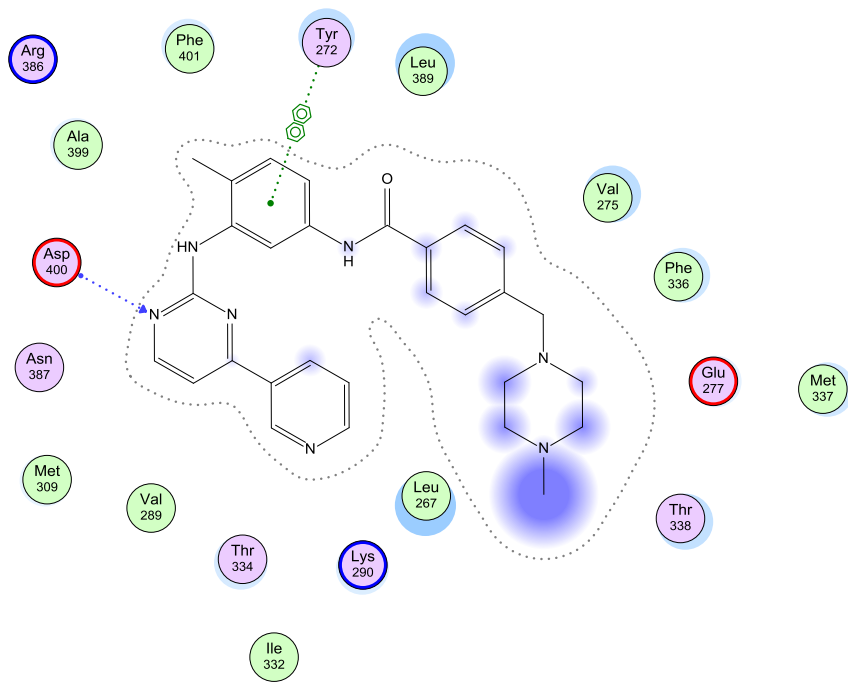

**Supplementary Figure S28.** Docking of p.(Glu373Asp) mutant ABL structure with Imatinib.



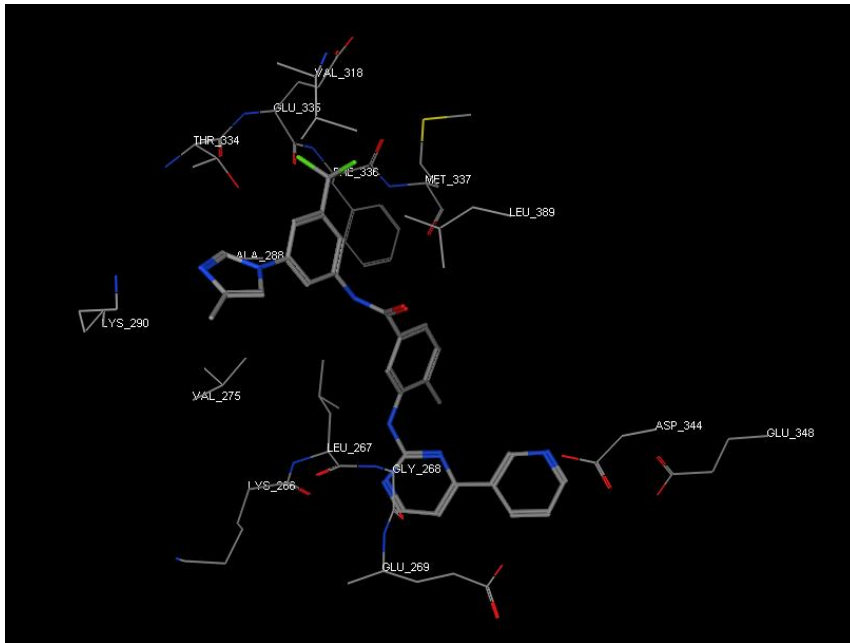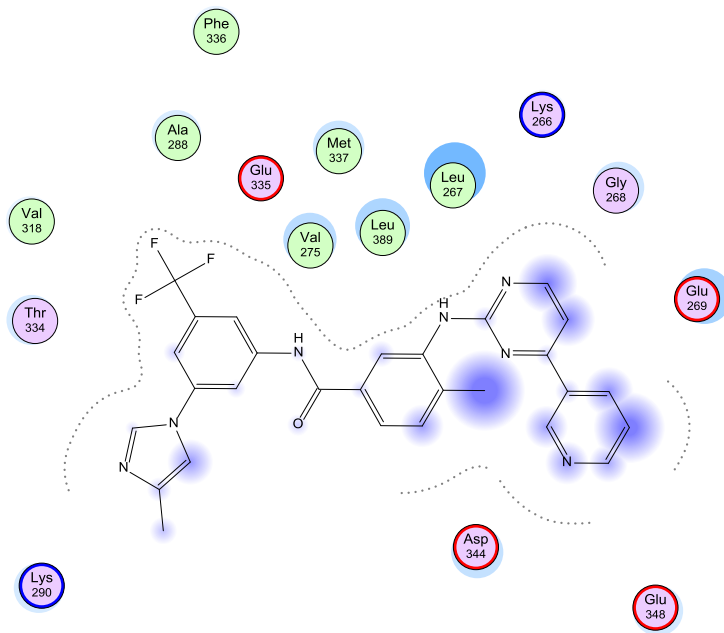

**Supplementary Figure S29.** Docking of p.(Gly250Glu) mutant ABL structure with Nilotinib.

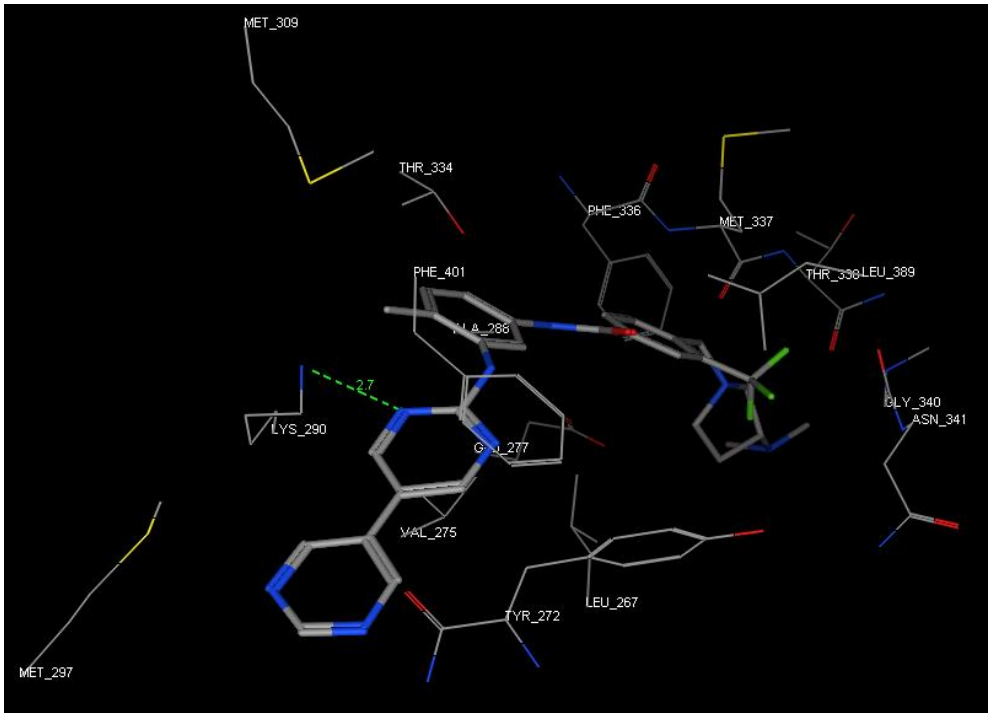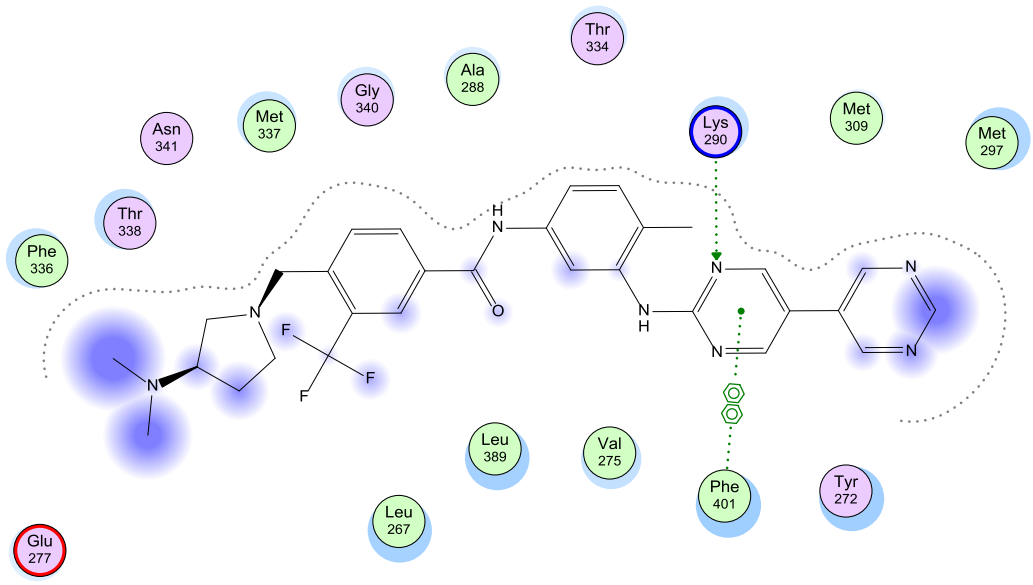

**Supplementary Figure S30.** Docking of p.(Gly250Glu) mutant ABL structure with Bafetinib.

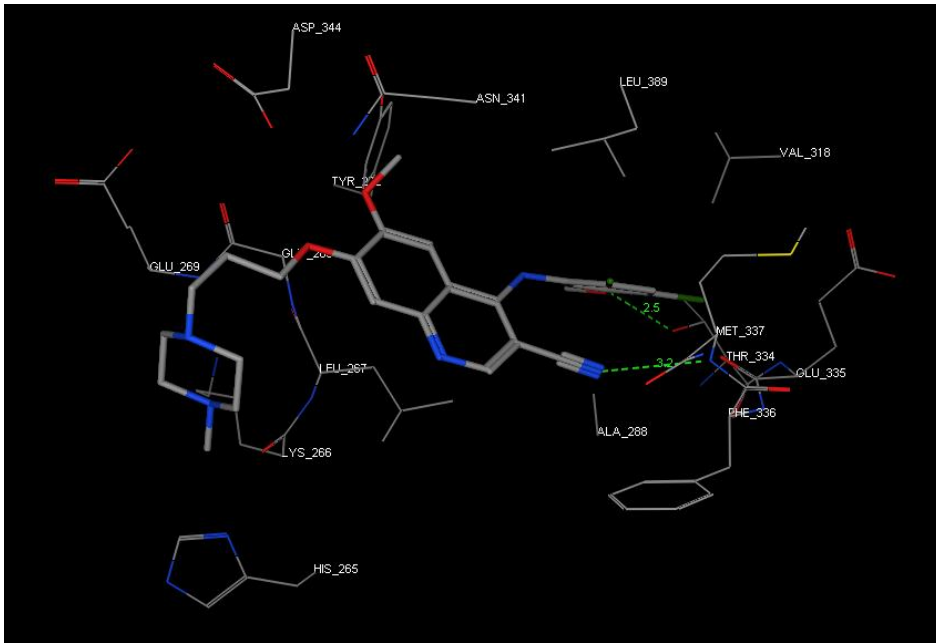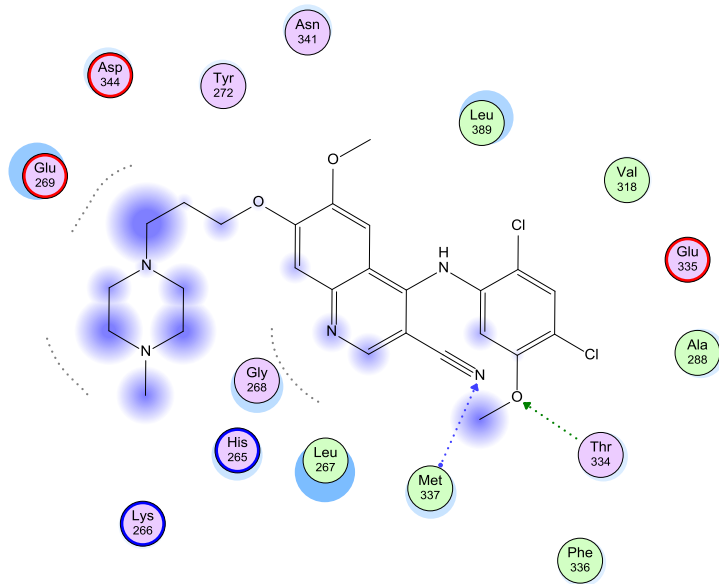

**Supplementary Figure S31.** Docking of p.(Gly250Glu) mutant ABL structure with Bosutinib.

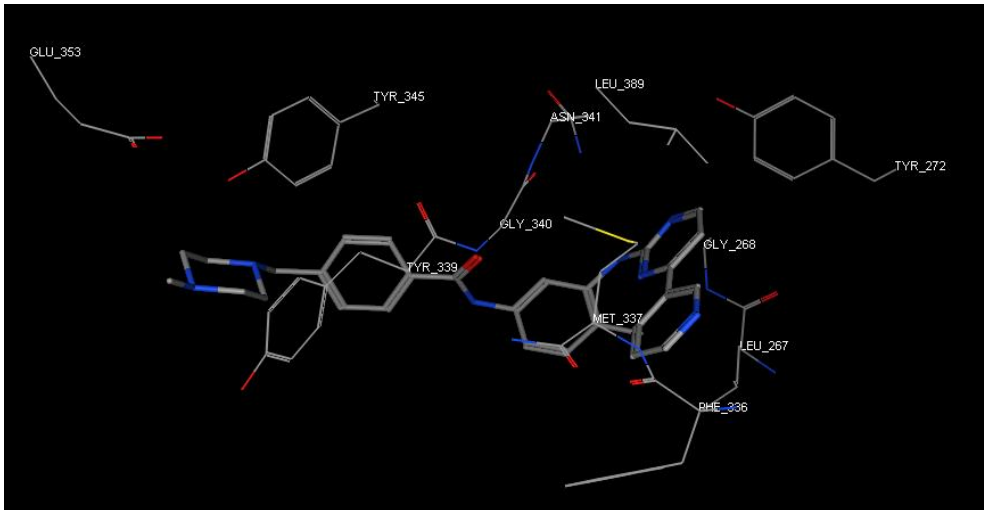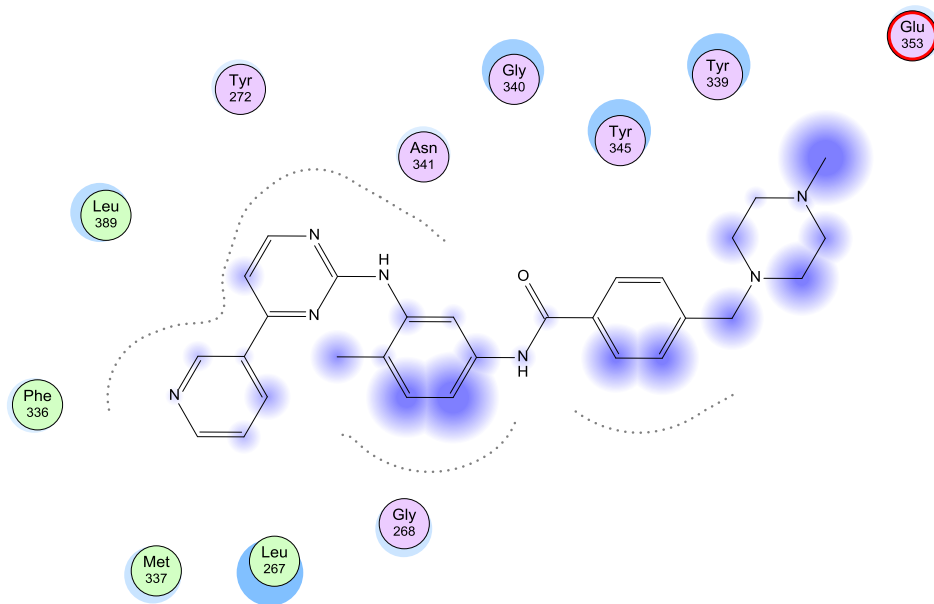

**Supplementary Figure S32.** Docking of p.(Gly250Glu) mutant ABL structure with Imatinib.

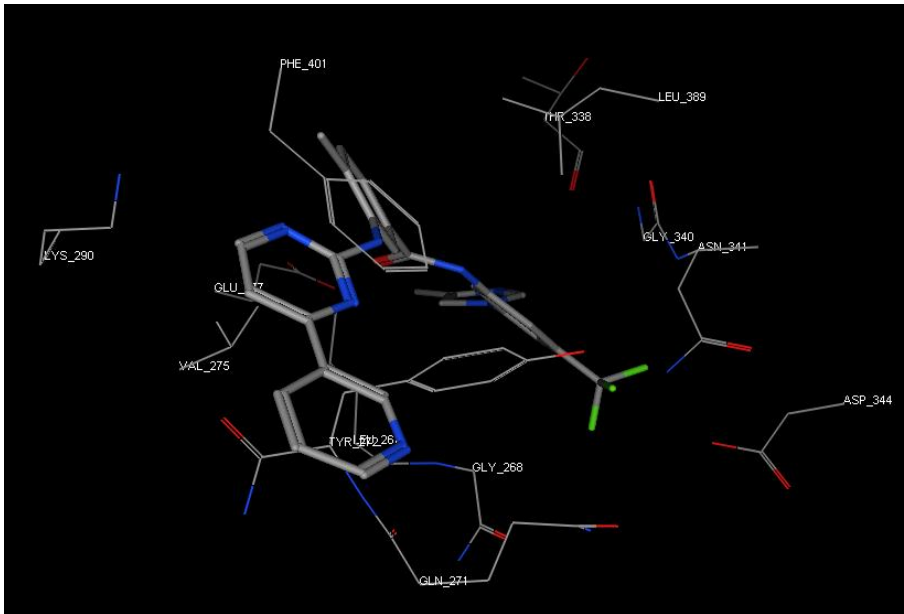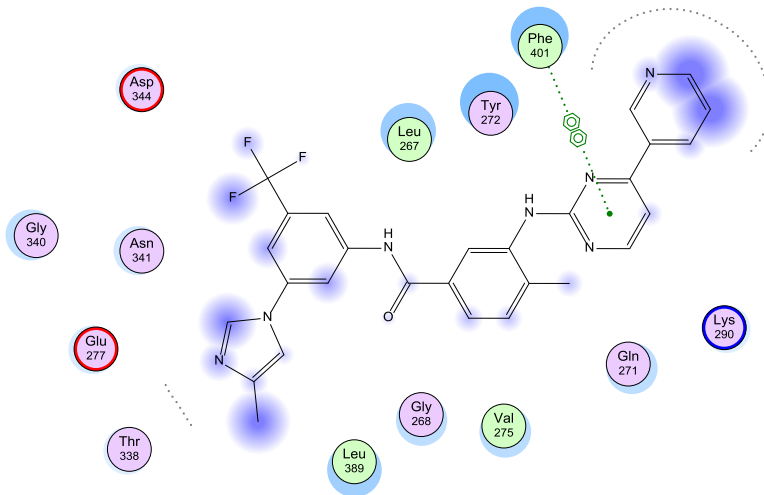

**Supplementary Figure S33.** Docking of p.(Leu301Ile) mutant ABL structure with Nilotinib.

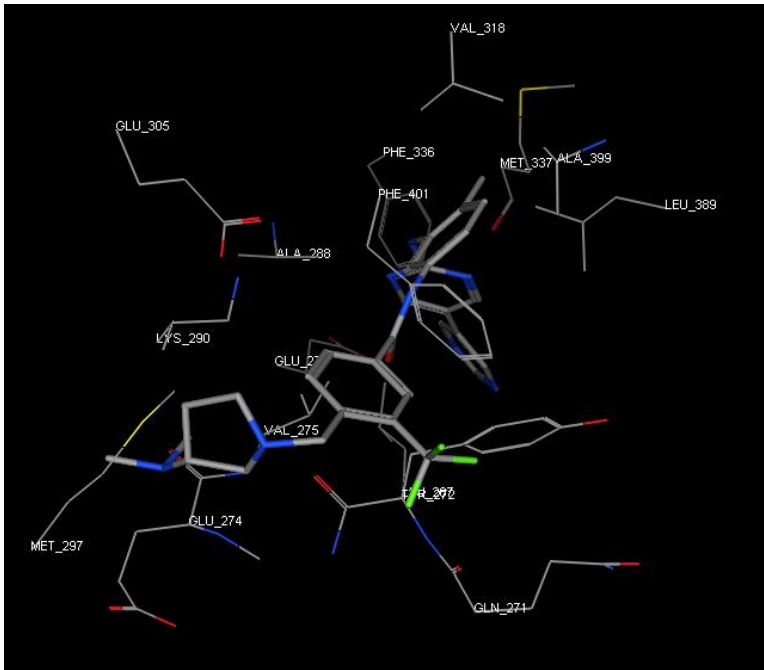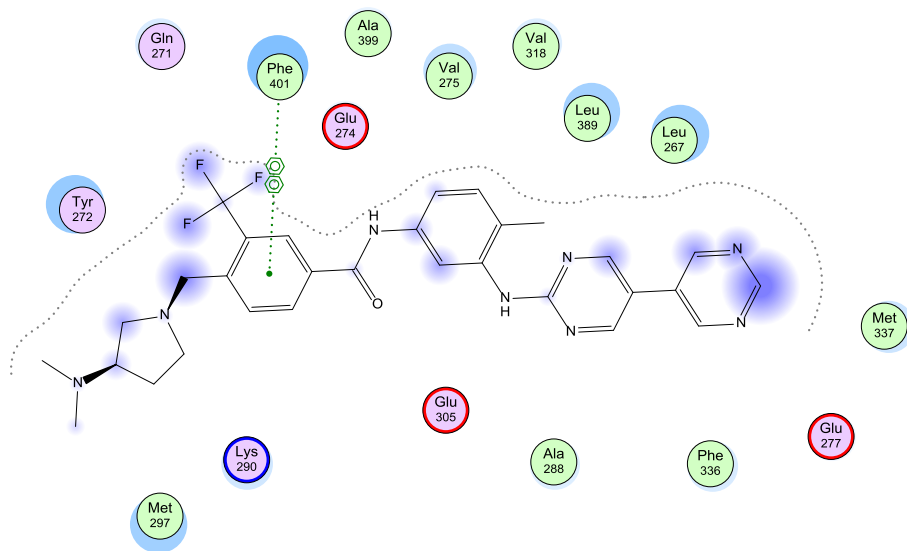

**Supplementary Figure S34.** Docking of p.(Leu301Ile) mutant ABL structure with Bafetinib.

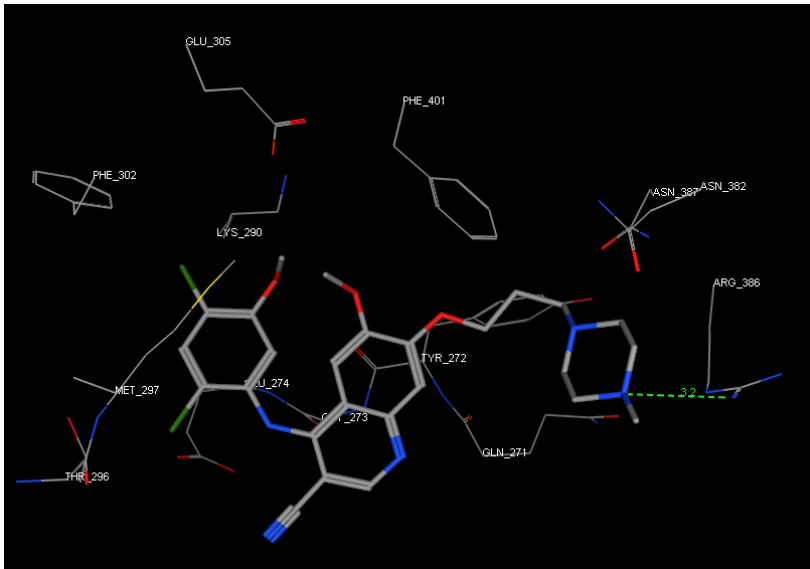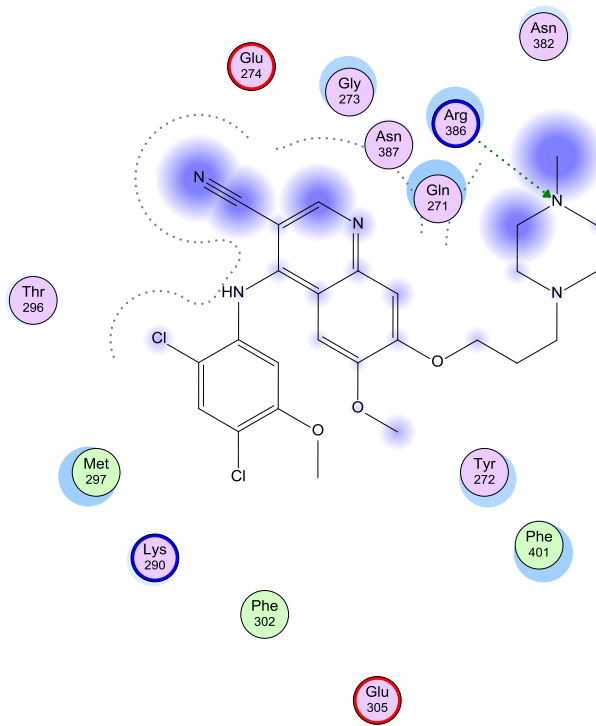

**Supplementary Figure S35.** Docking of p.(Leu301Ile) mutant ABL structure with Bosutinib.

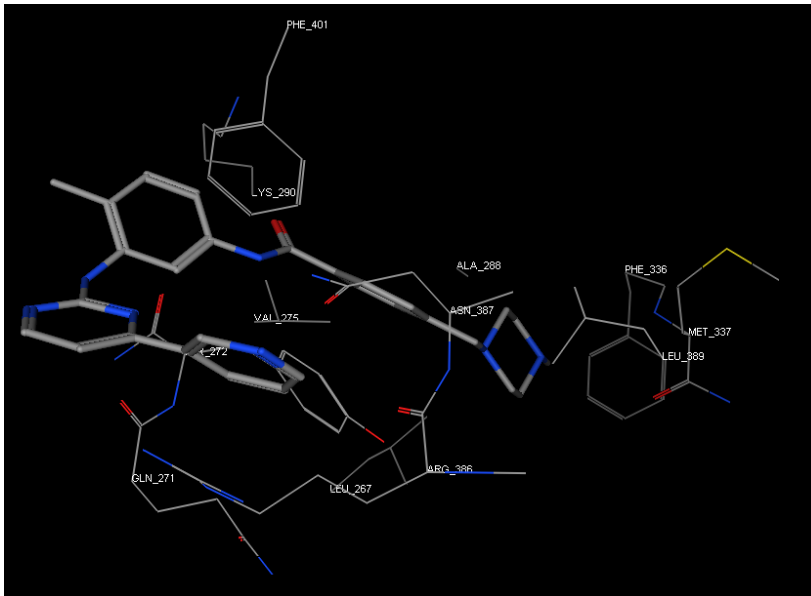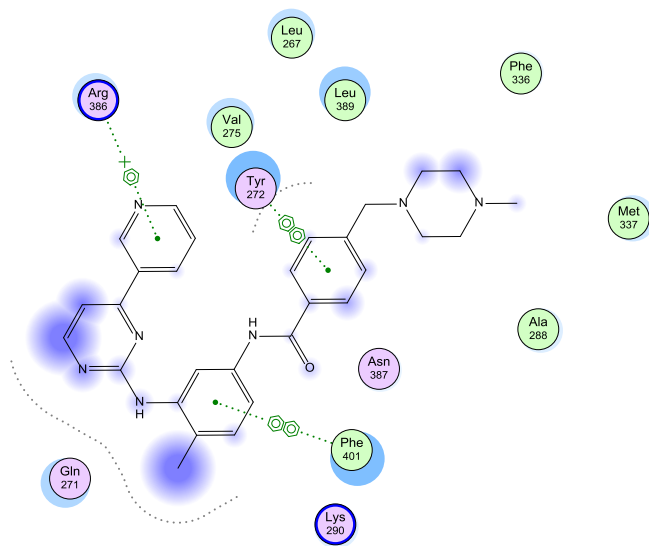

**Supplementary Figure S36.** Docking of p.(Leu301Ile) mutant ABL structure with Imatinib.



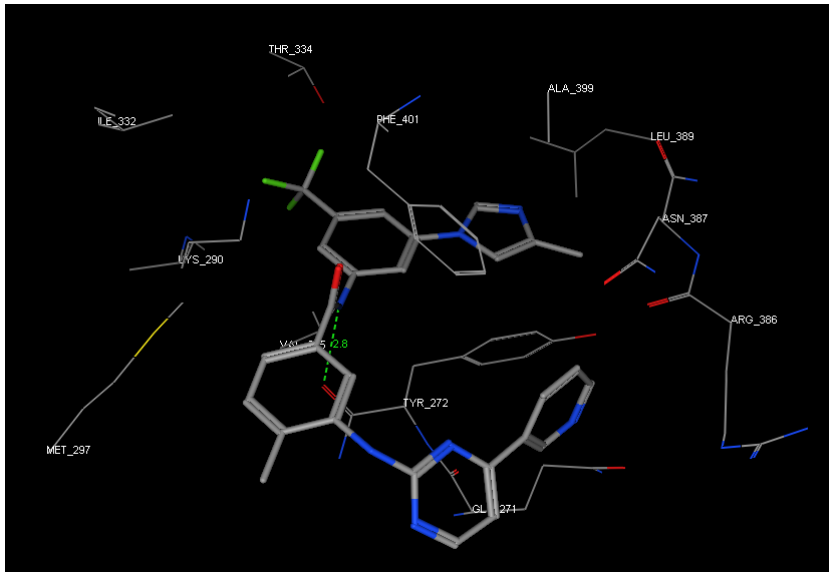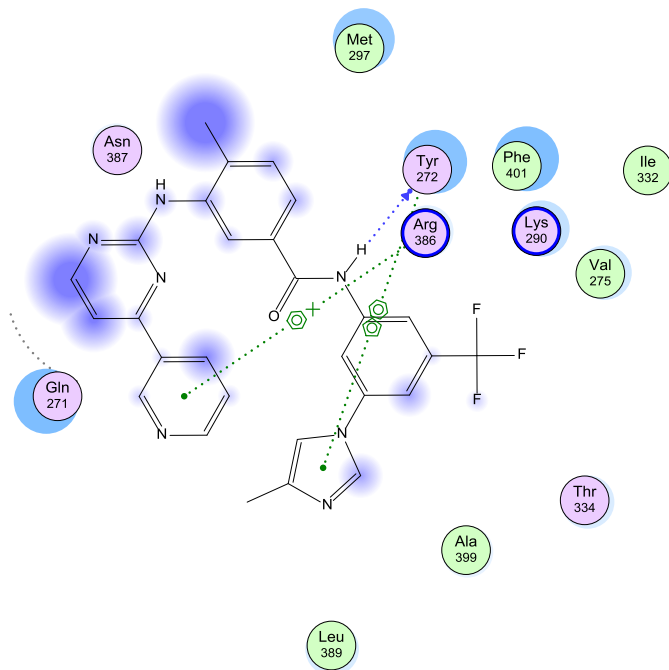

**Supplementary Figure S37.** Docking of p.(Met351Thr) mutant ABL structure with Nilotinib.

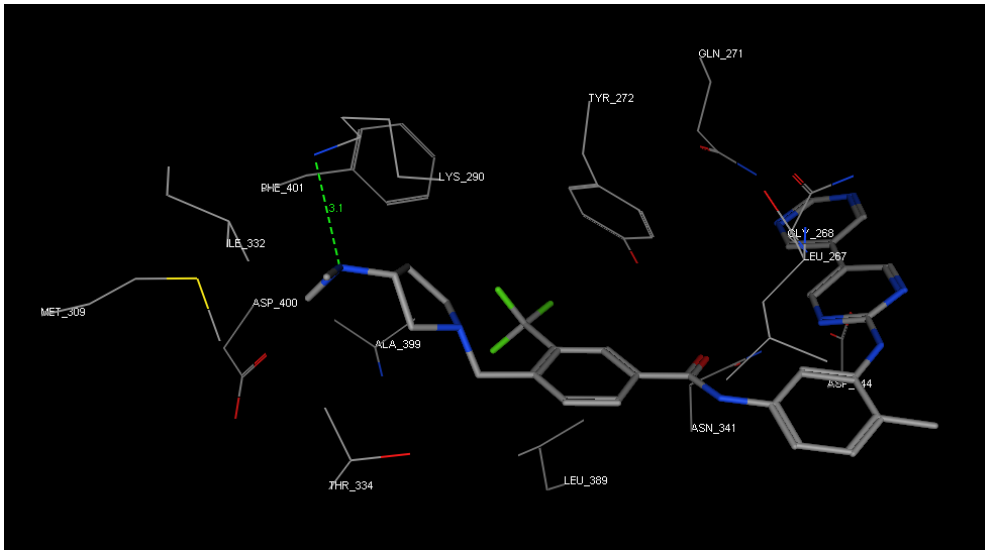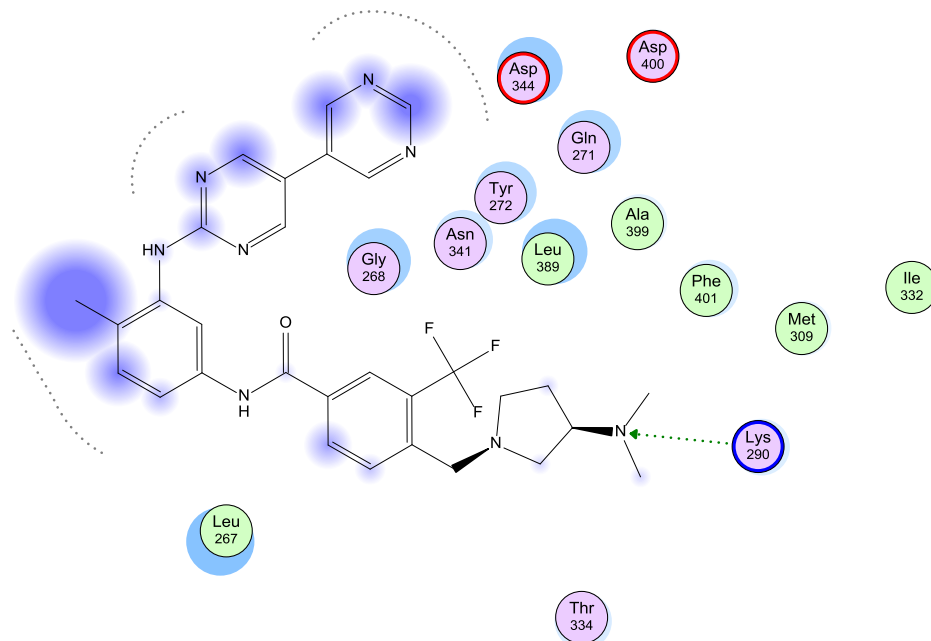

**Supplementary Figure S38.** Docking of p.(Met351Thr) mutant ABL structure with Bafetinib.

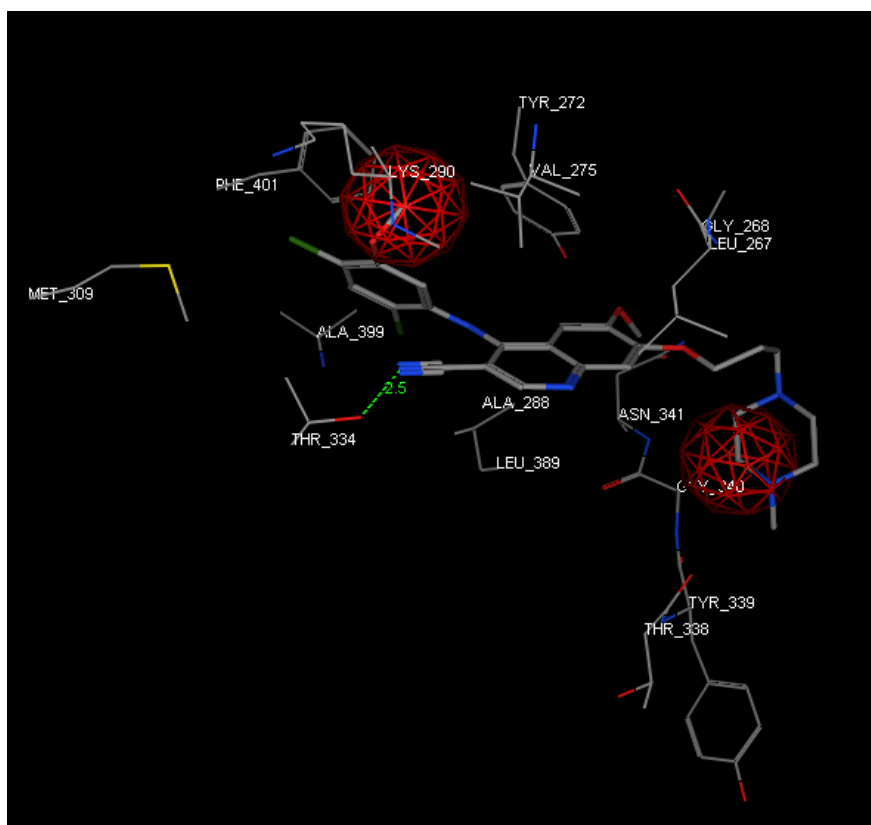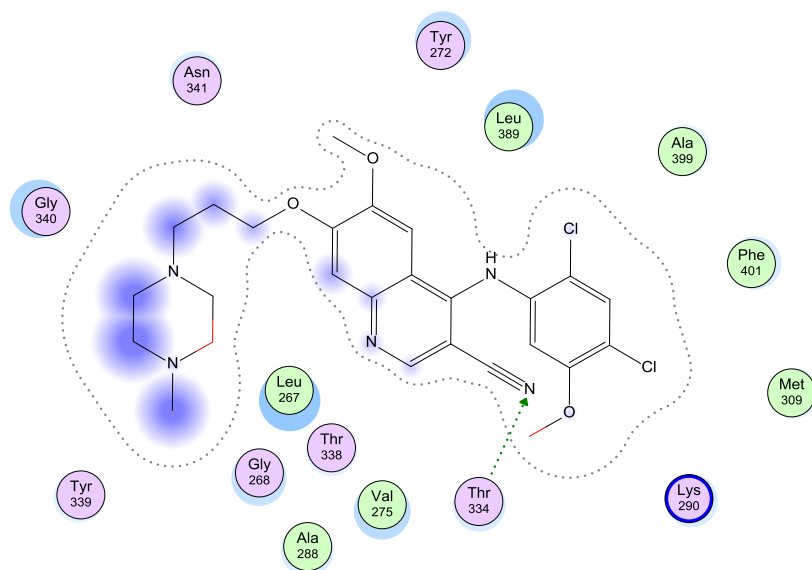

**Supplementary Figure S39.** Docking of p.(Met351Thr) mutant ABL structure with Bosutinib.

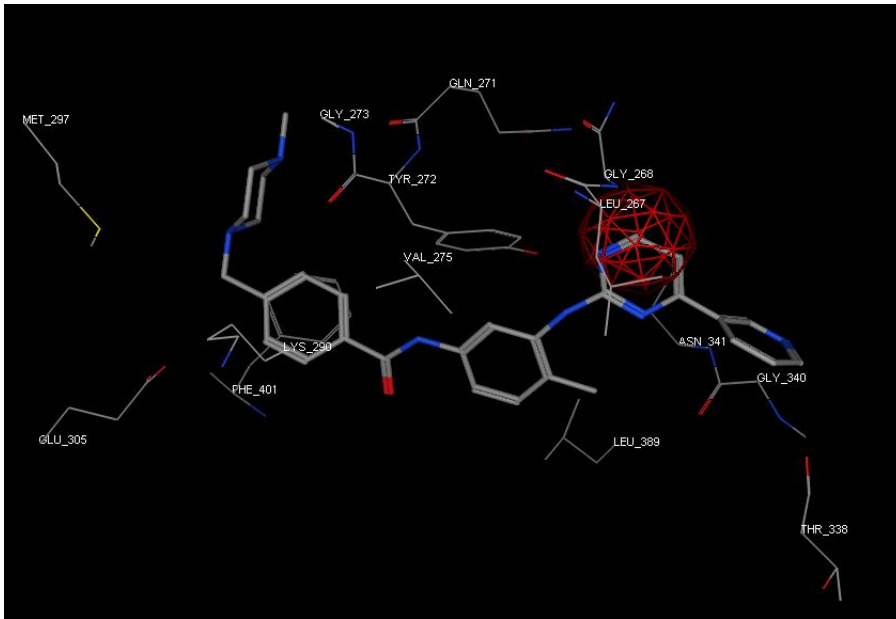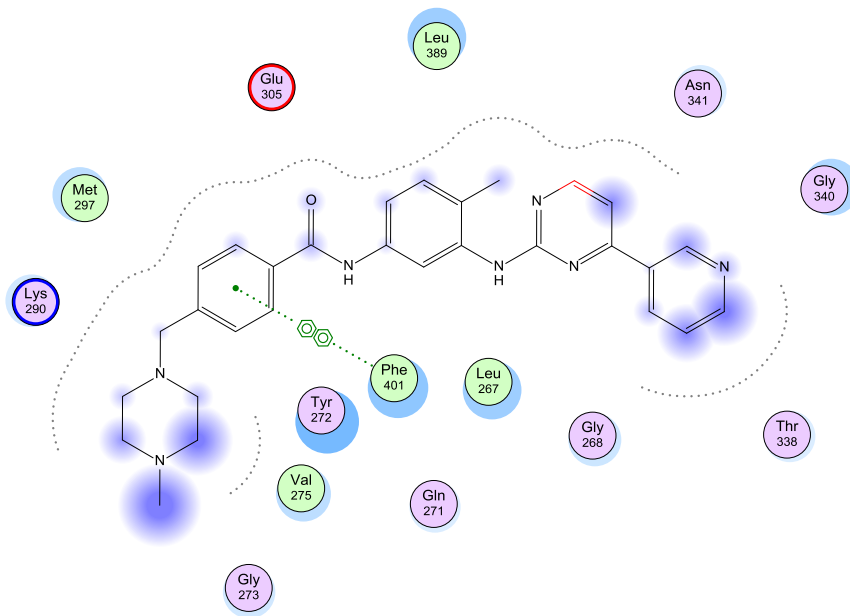

**Supplementary Figure S40.** Docking of p.(Met351Thr) mutant ABL structure with Imatinib.

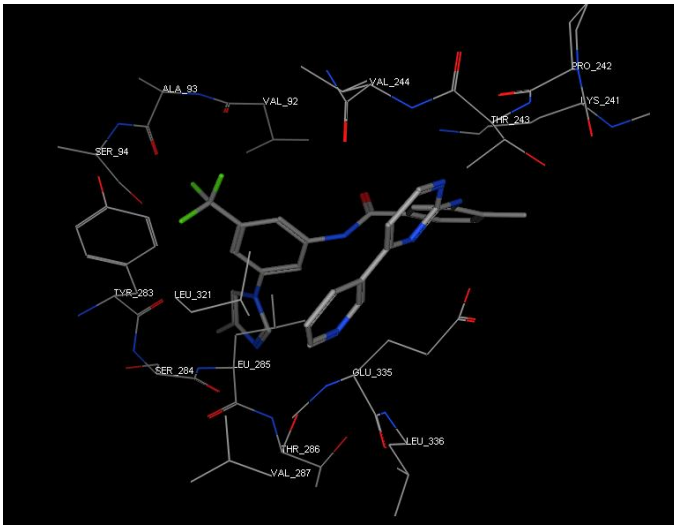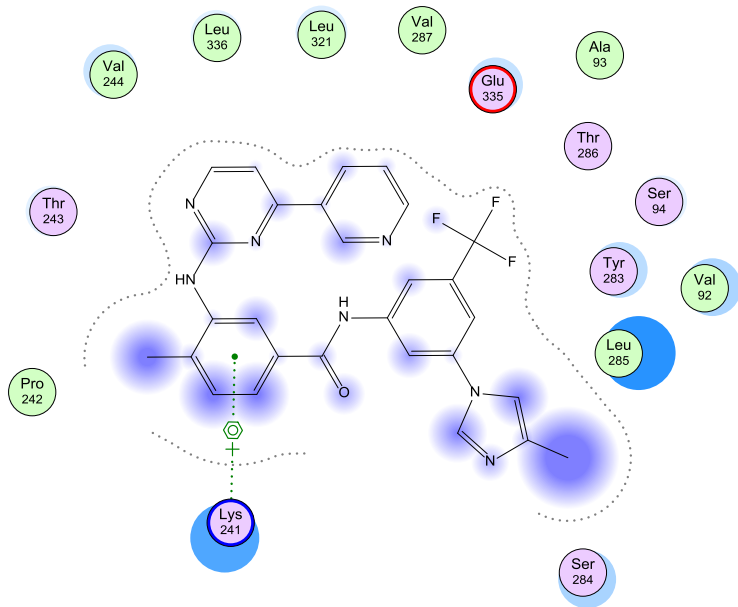

**Supplementary Figure S41.** Docking of p.(Phe317Leu) mutant ABL structure with Nilotinib.

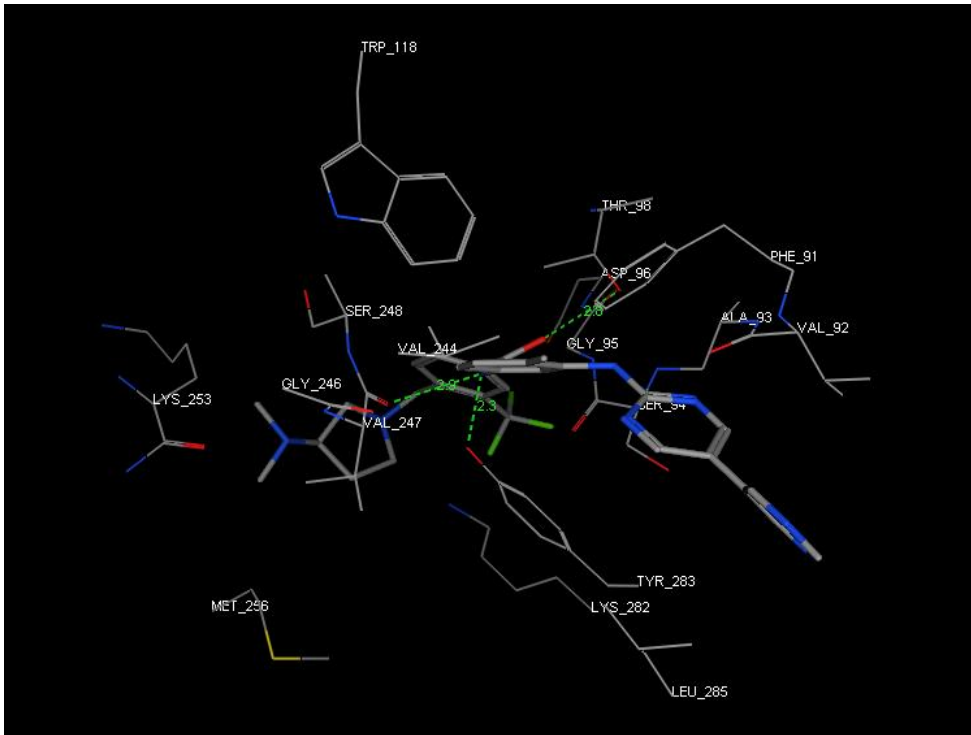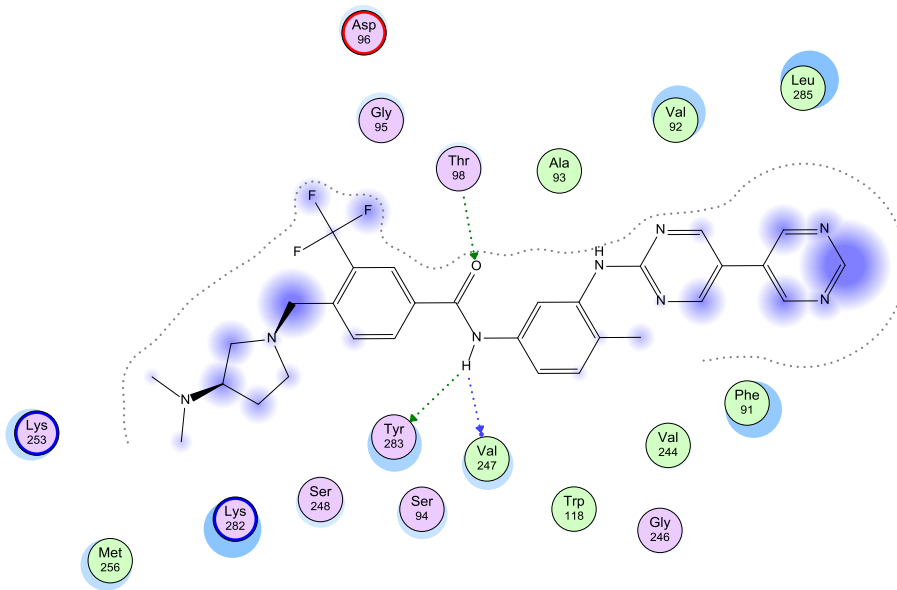

**Supplementary Figure S42.** Docking of p.(Phe317Leu) mutant ABL structure with Bafetinib.

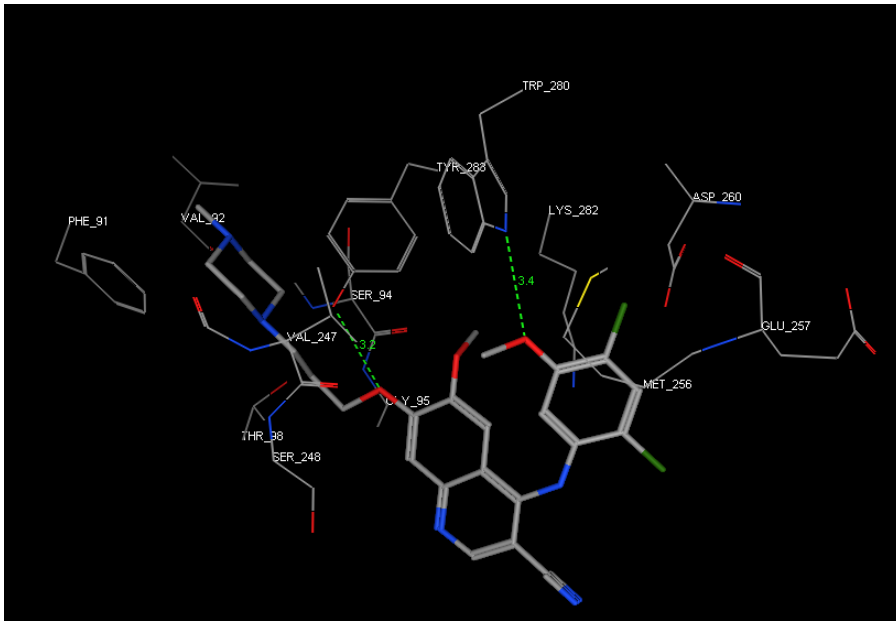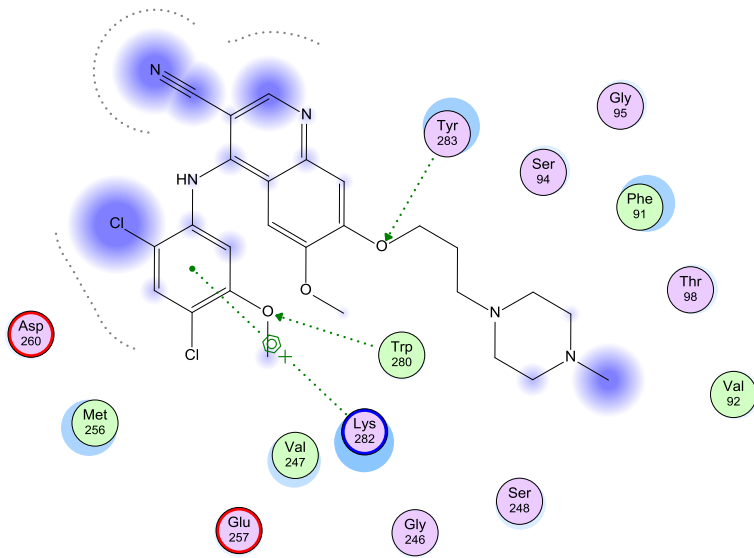

**Supplementary Figure S43.** Docking of p.(Phe317Leu) mutant ABL structure with Bosutinib.

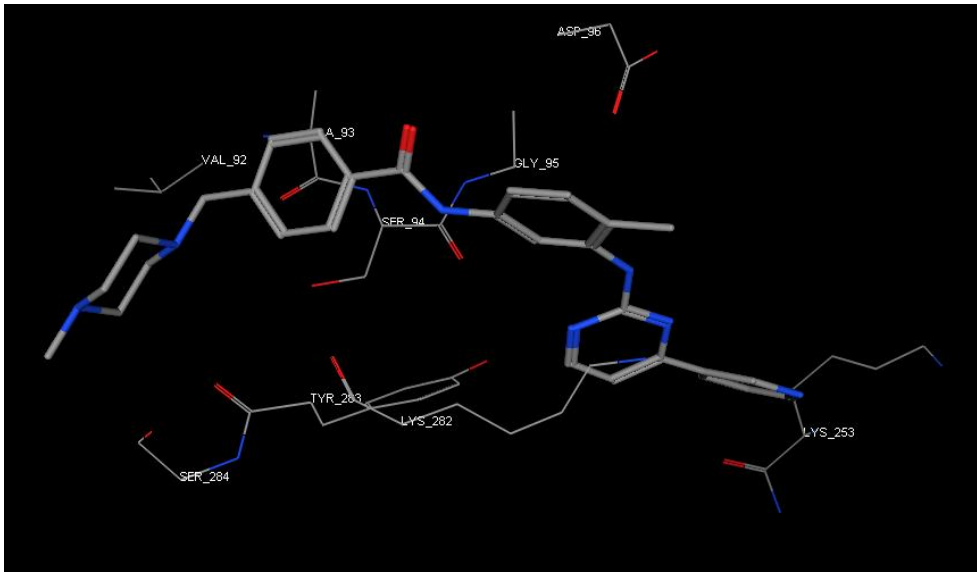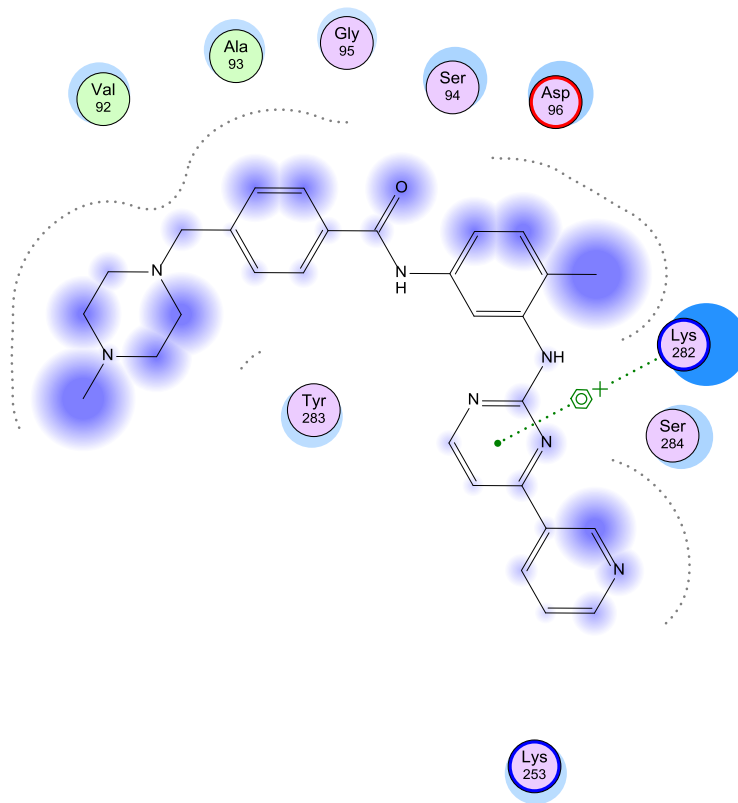

**Supplementary Figure S44.** Docking of p.(Phe317Leu) mutant ABL structure with Imatinib.



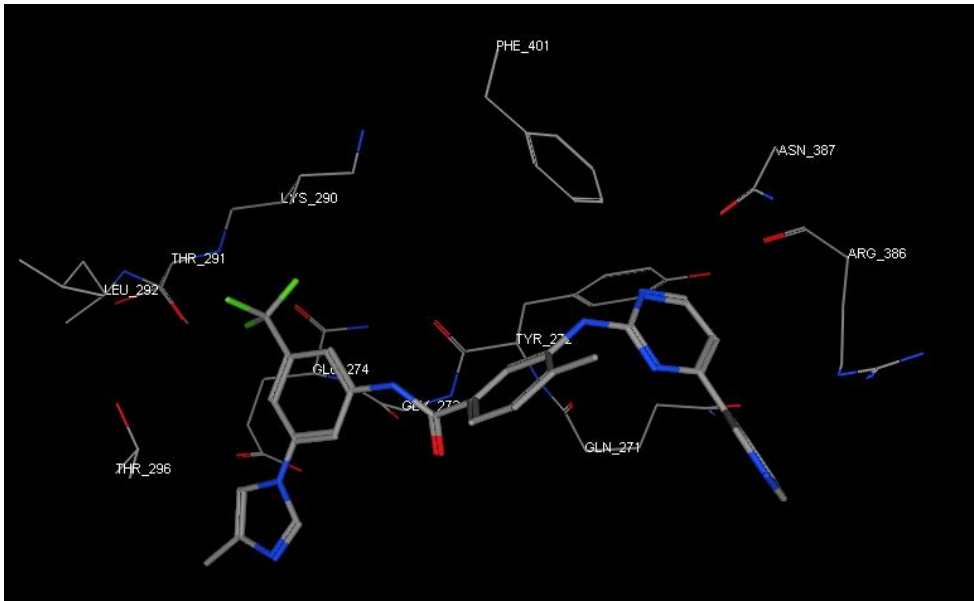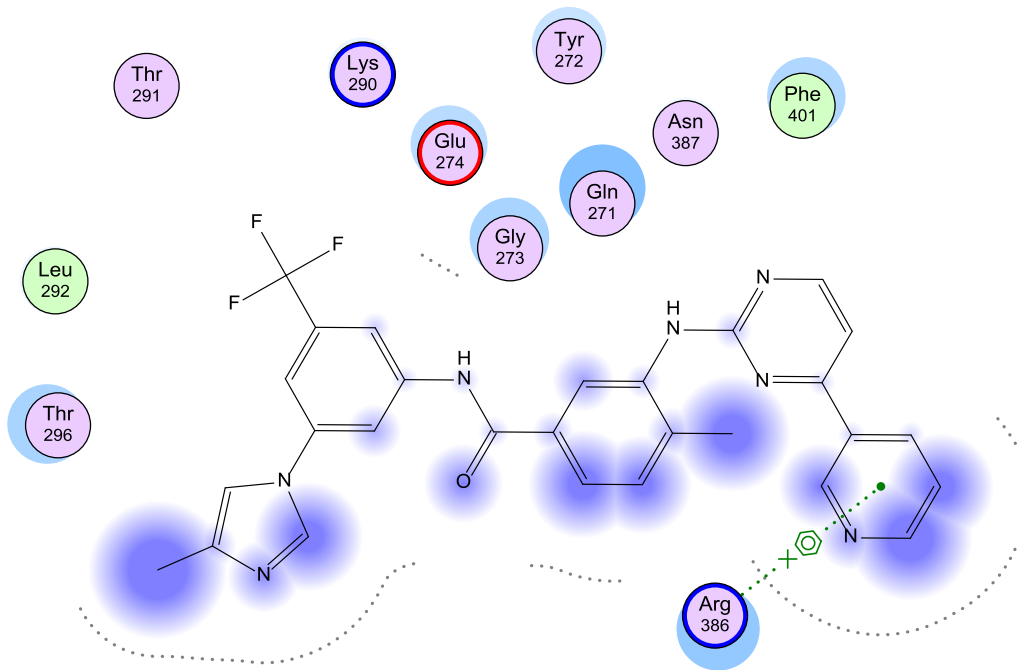

**Supplementary Figure S45.** Docking of p.(Thr315Ile) mutant ABL structure with Nilotinib.

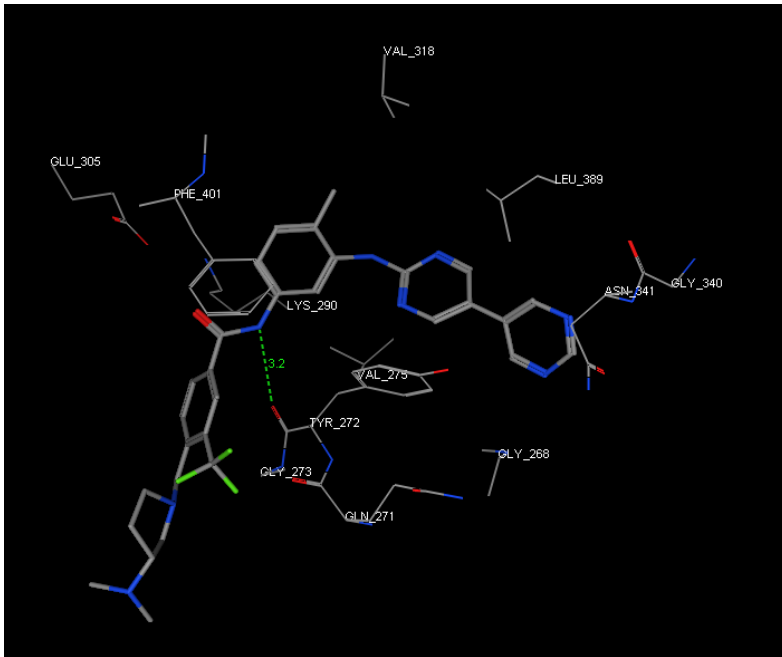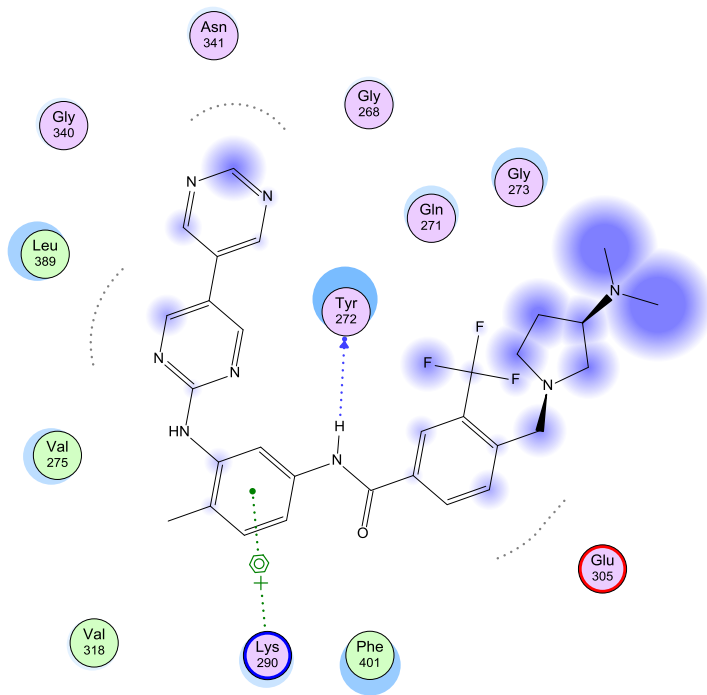

**Supplementary Figure S46.** Docking of p.(Thr315Ile) mutant ABL structure with Bafetinib.

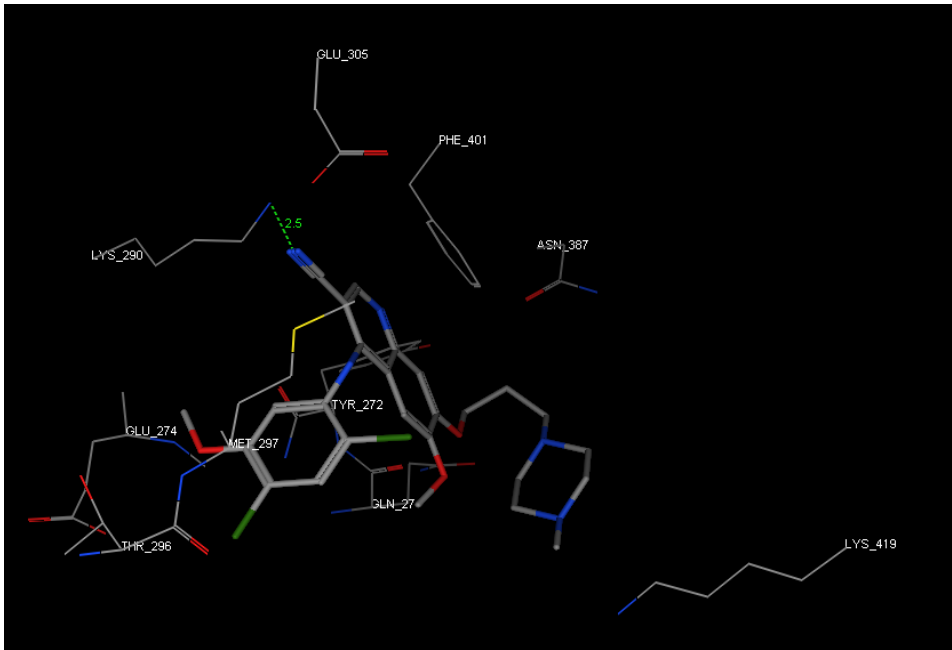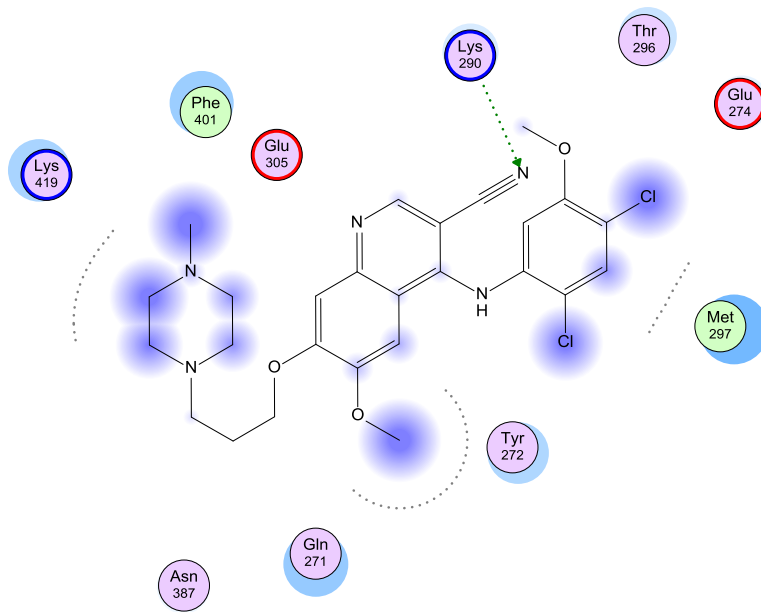

**Supplementary Figure S47.** Docking of p.(Thr315Ile) mutant ABL structure with Bosutinib.

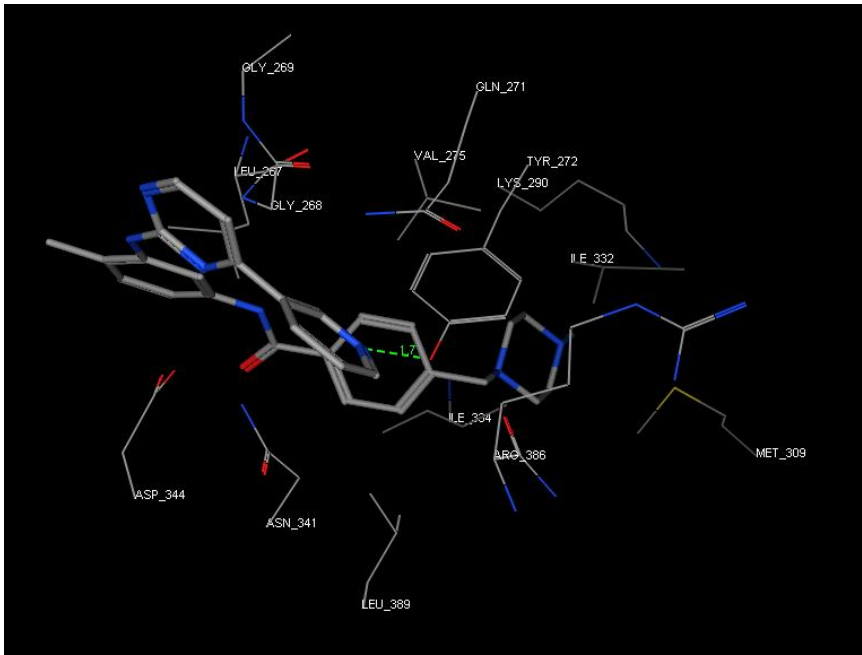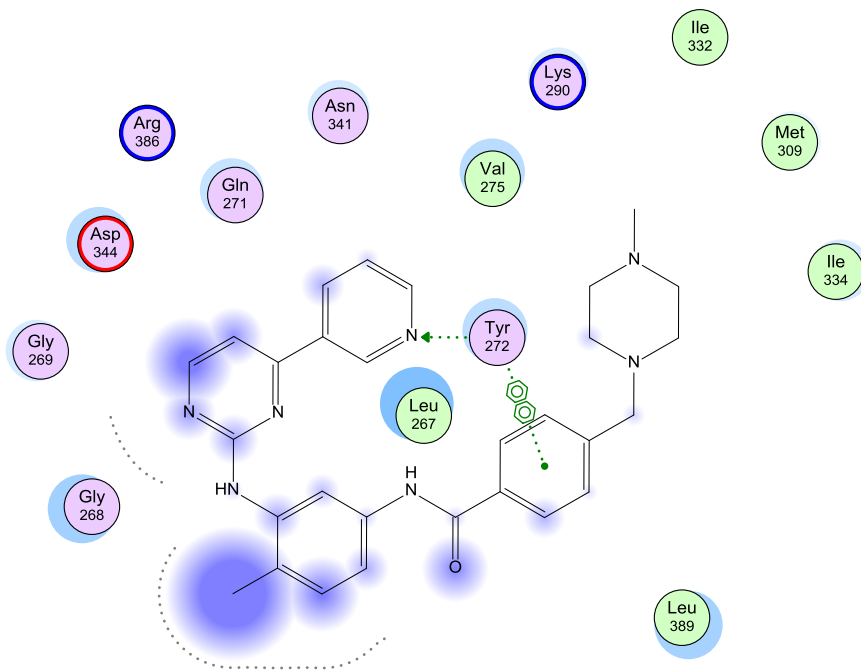

**Supplementary Figure S48.** Docking of p.(Thr315Ile) mutant ABL structure with Imatinib.

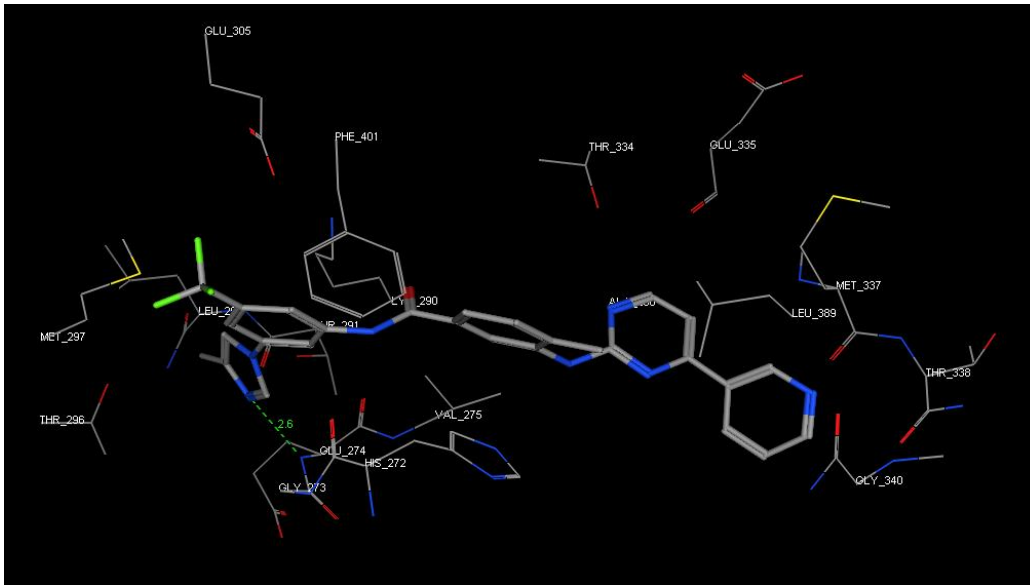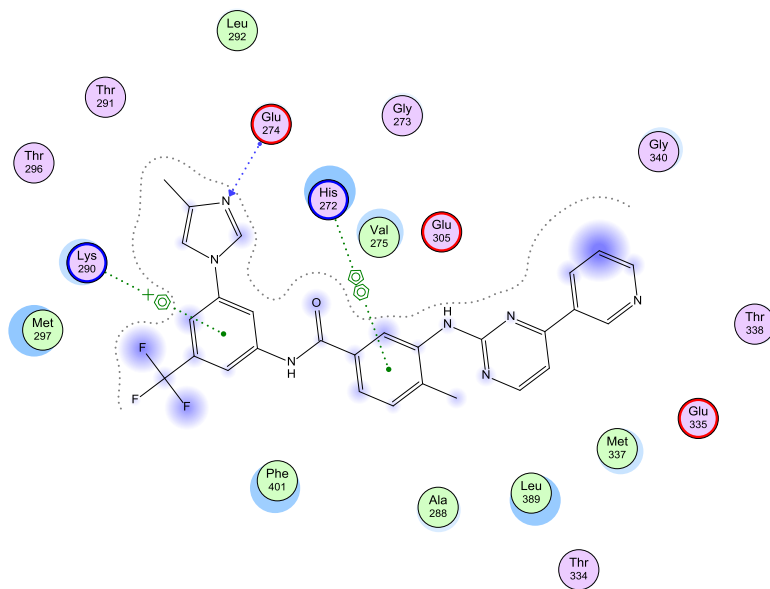

**Supplementary Figure S49.** Docking of p.(Tyr253His) mutant ABL structure with Nilotinib.

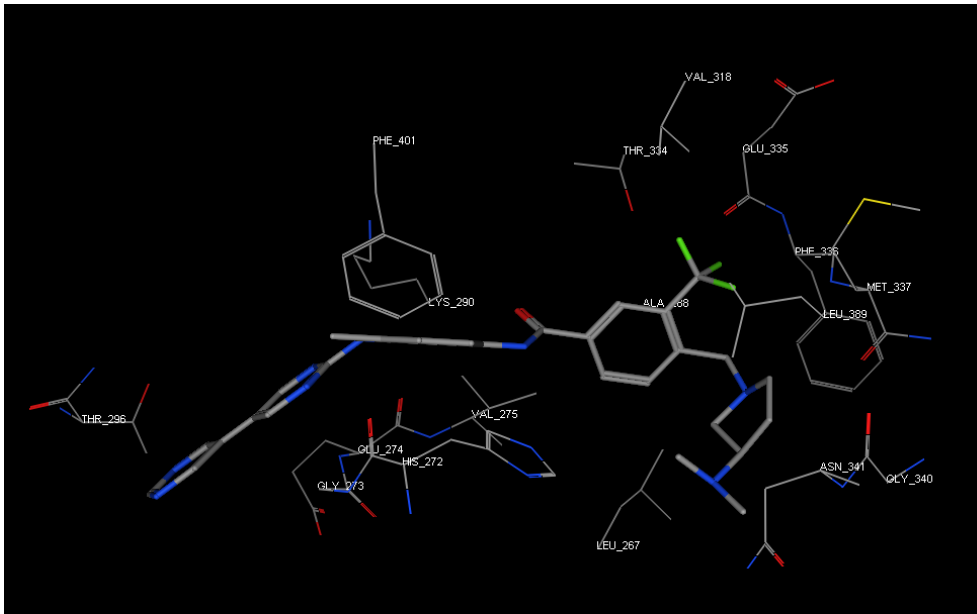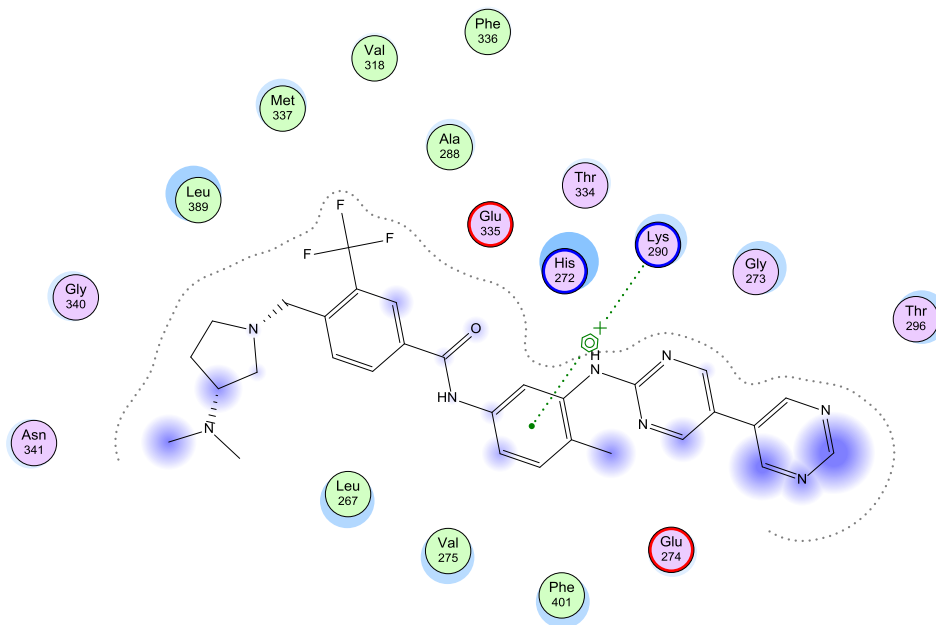

**Supplementary Figure S50.** Docking of p.(Tyr253His) mutant ABL structure with Bafetinib.

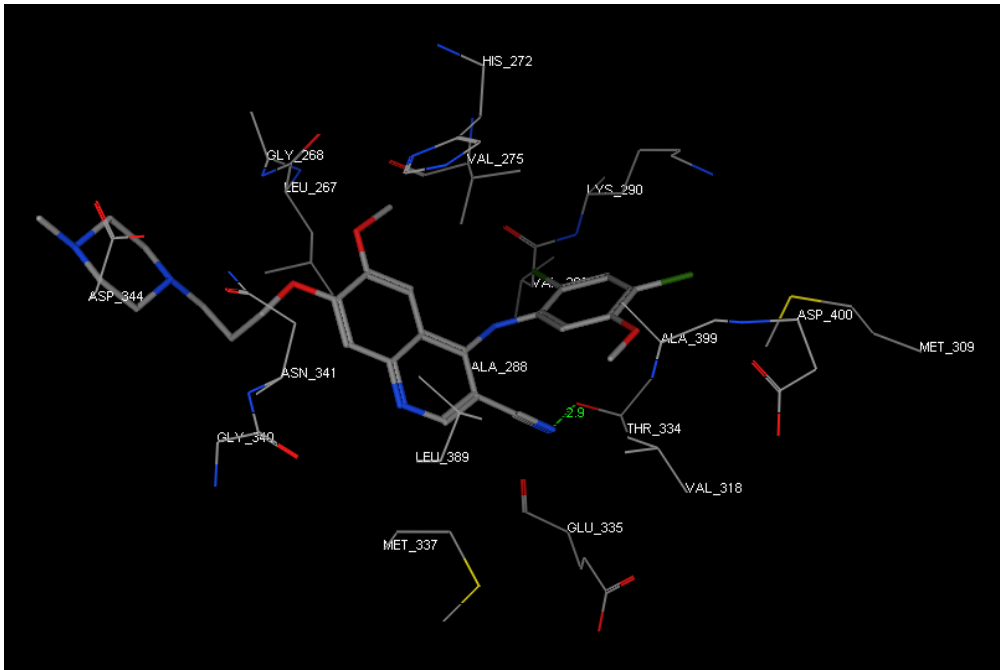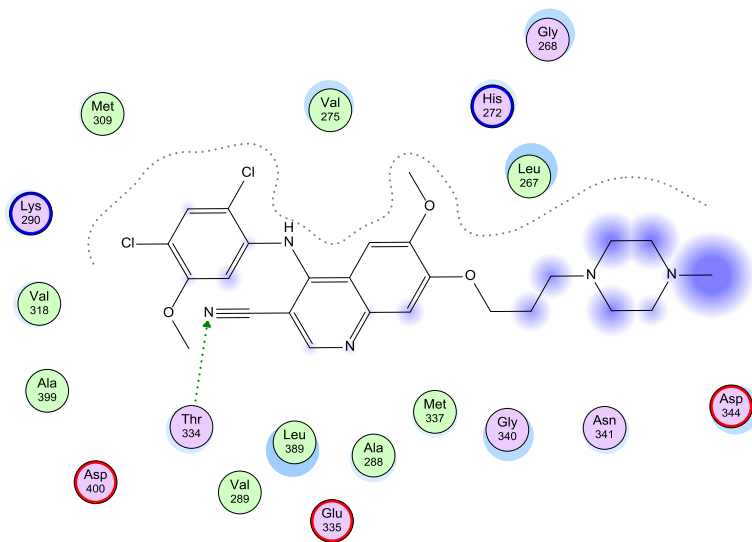

**Supplementary Figure S51.** Docking of p.(Tyr253His) mutant ABL structure with Bosutinib.

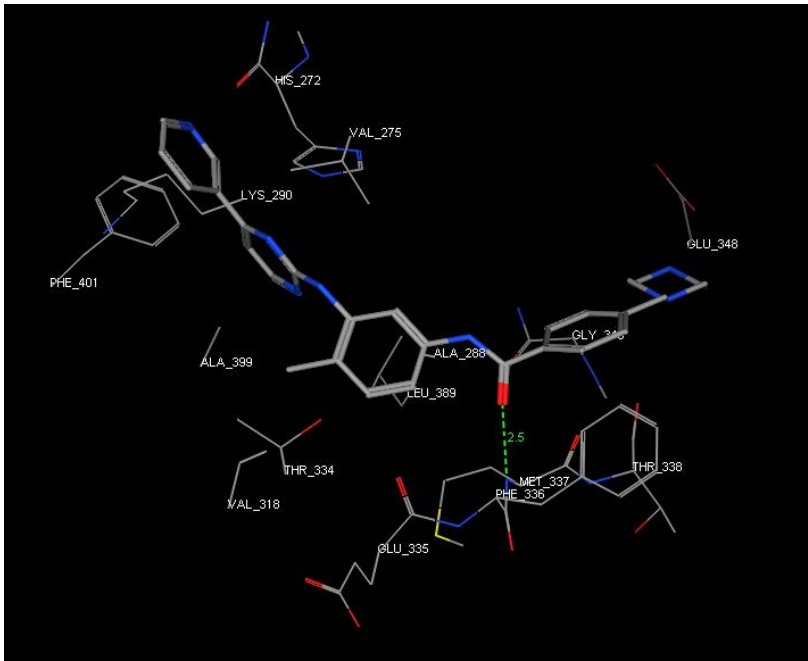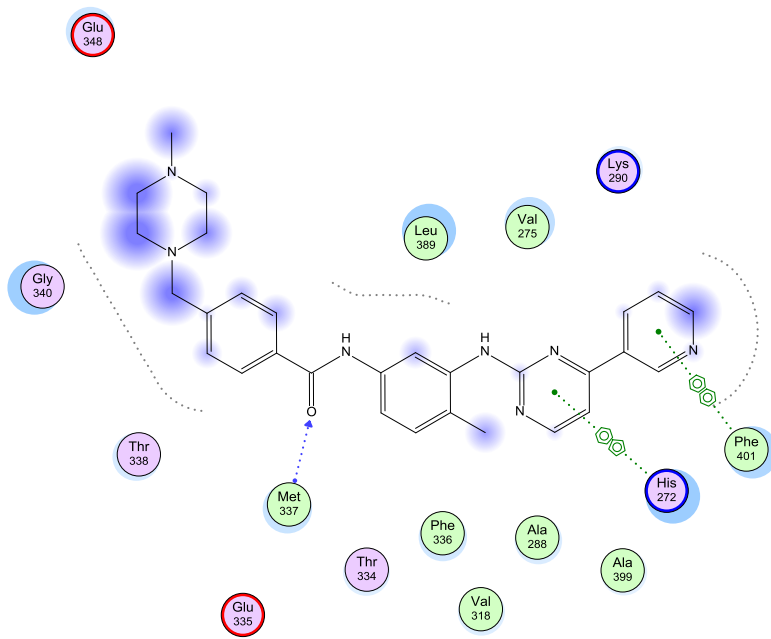

**Supplementary Figure S52.** Docking of p.(Tyr253His) mutant ABL structure with Imatinib.



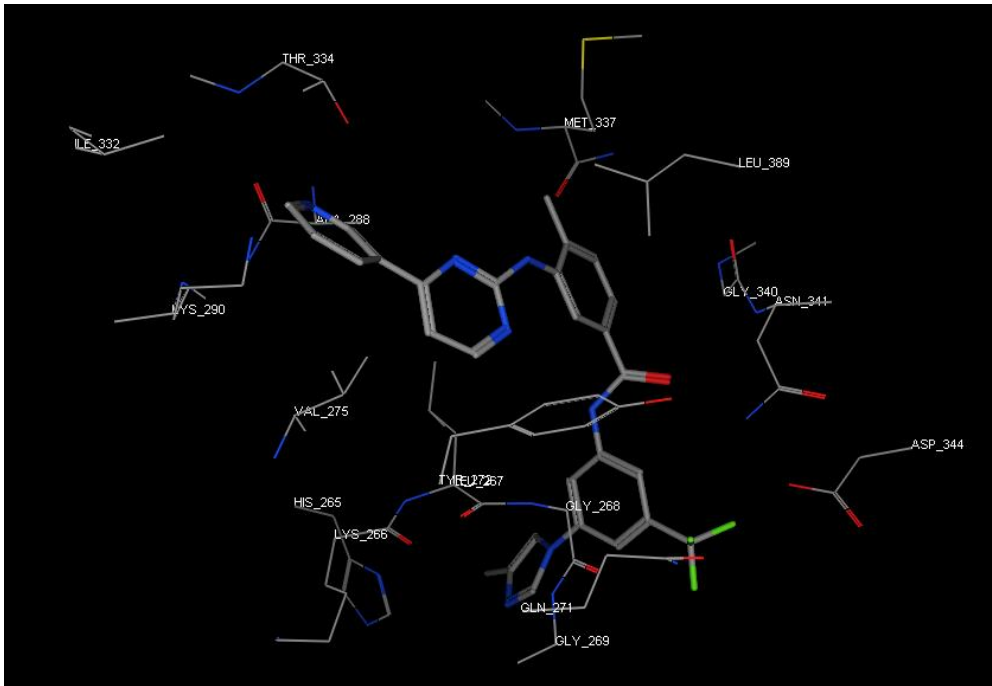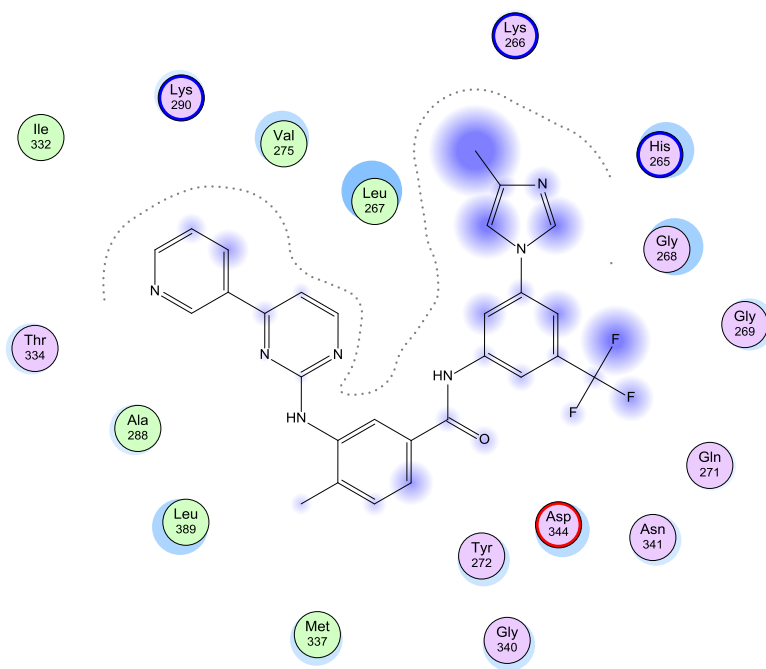

**Supplementary Figure S53.** Docking of p.(Tyr320His) mutant ABL structure with Nilotinib.

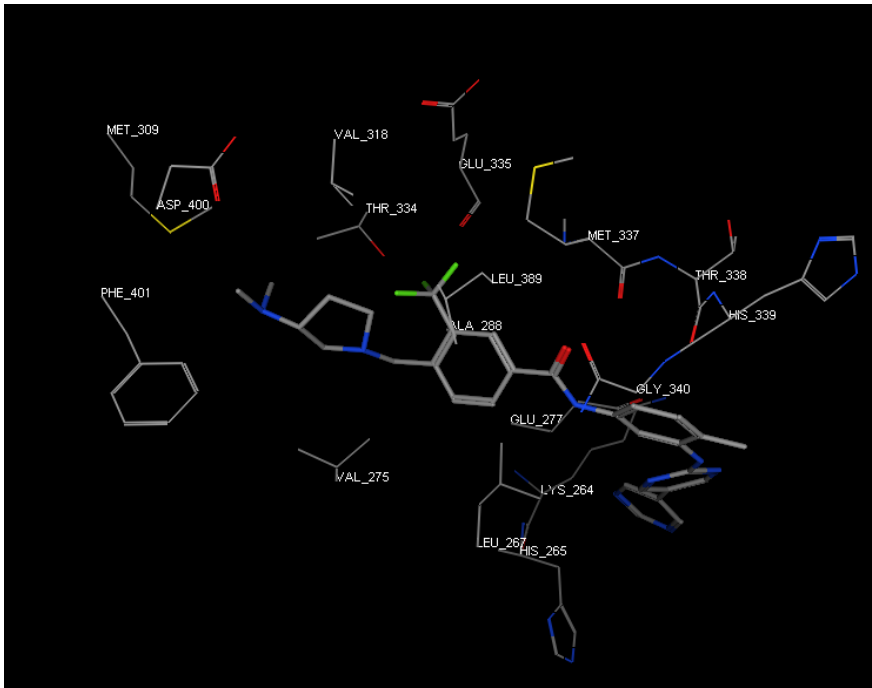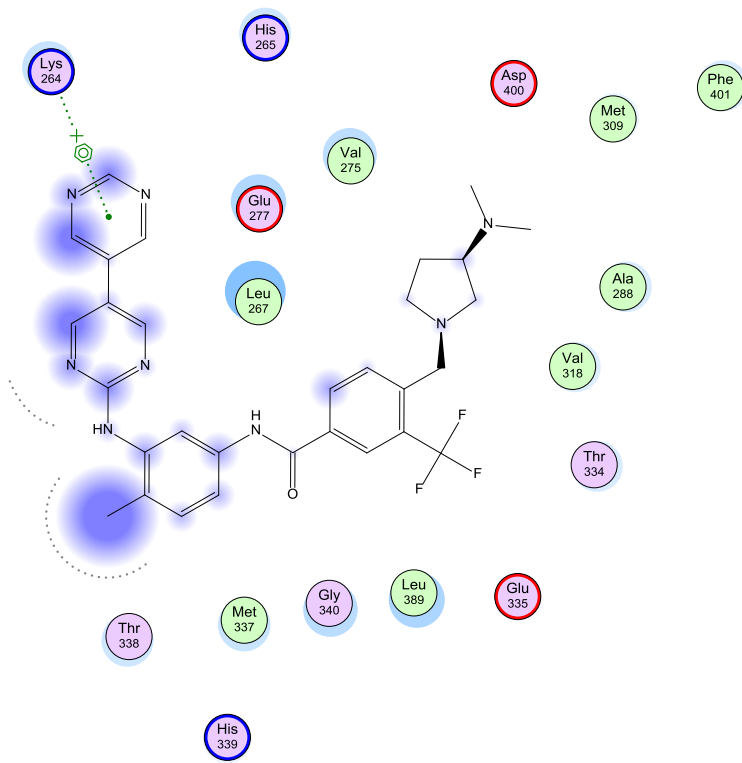

**Supplementary Figure S54.** Docking of p.(Tyr320His) mutant ABL structure with Bafetinib.

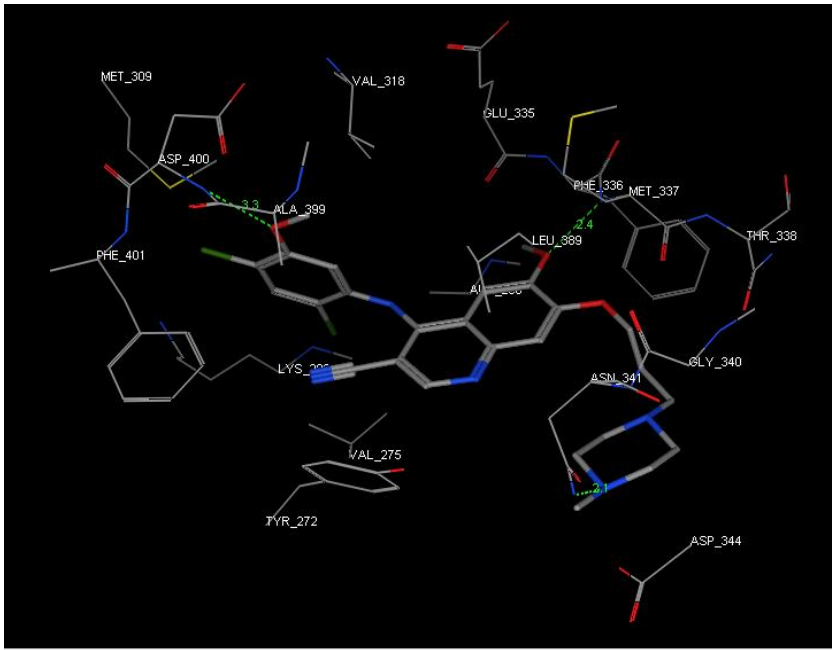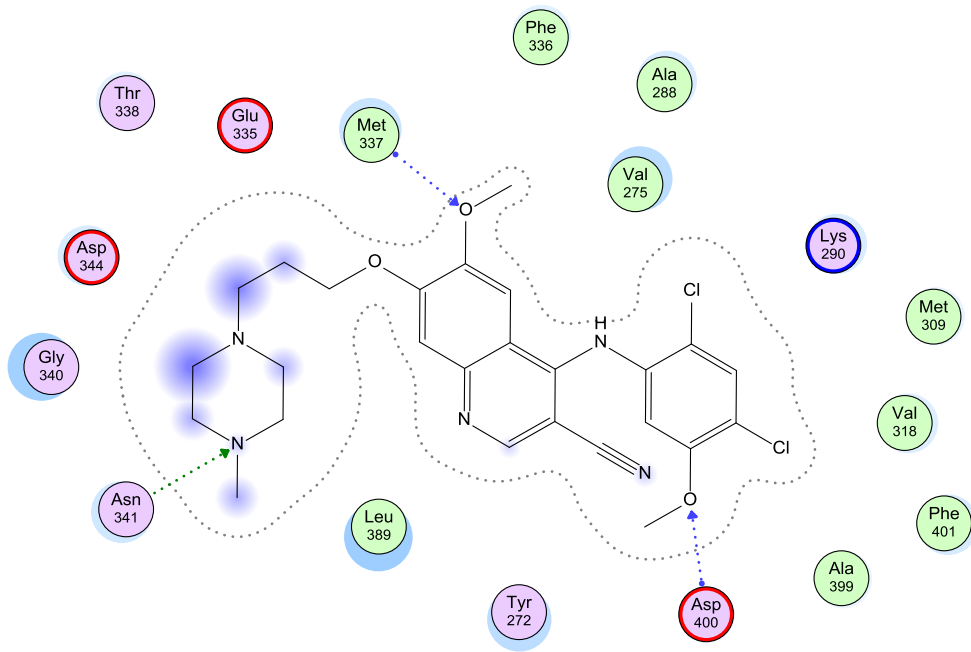

**Supplementary Figure S55.** Docking of p.(Tyr320His) mutant ABL structure with Bosutinib.

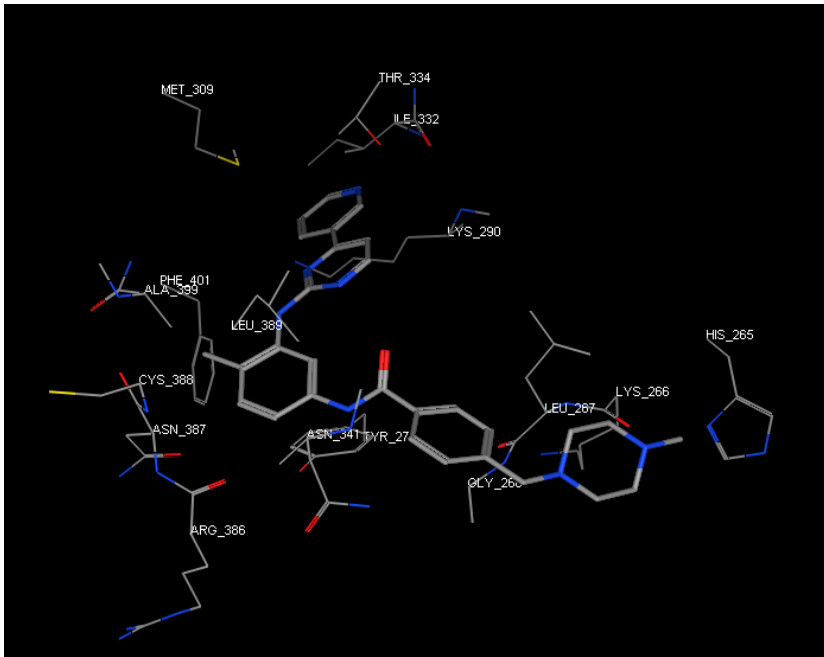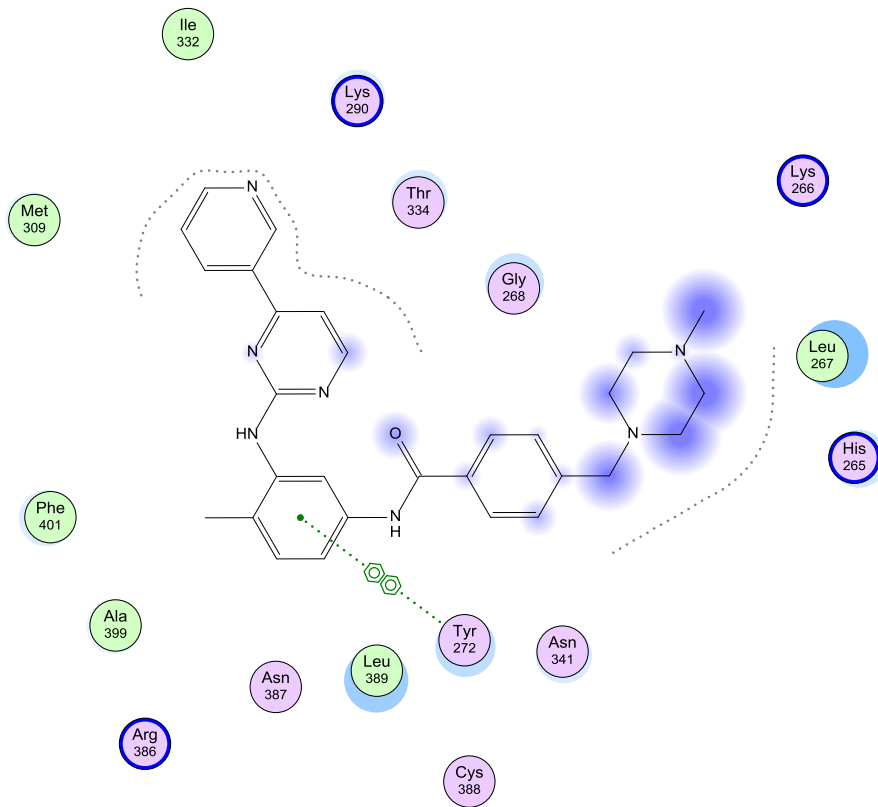

**Supplementary Figure S56.** Docking of p.(Tyr320His) mutant ABL structure with Imatinib.

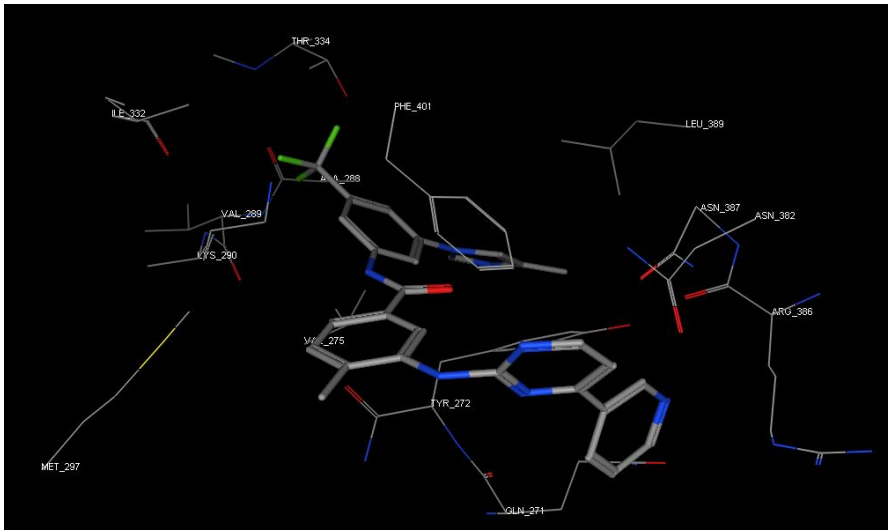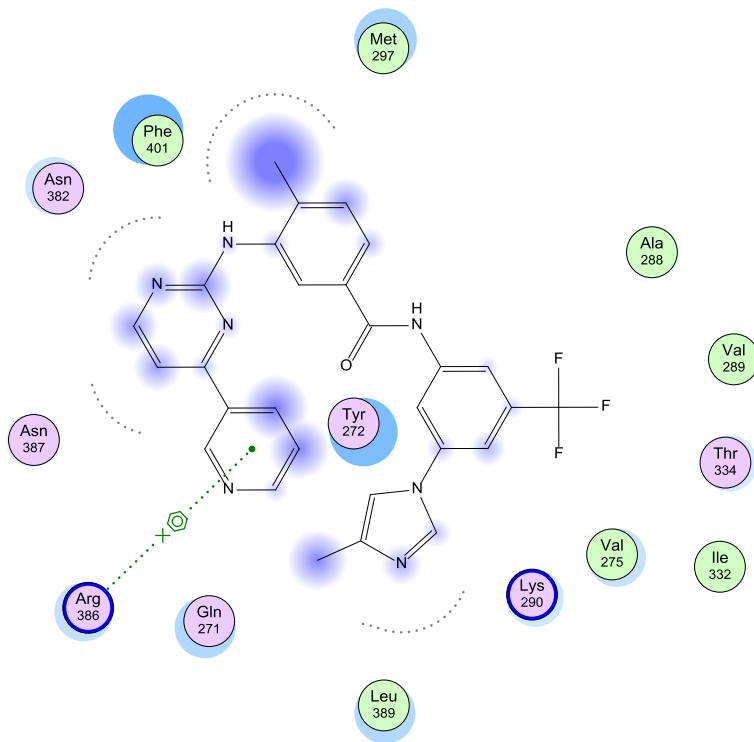

**Supplementary Figure S57.** Docking of p.(Tyr393\*) mutant ABL structure with Nilotinib.

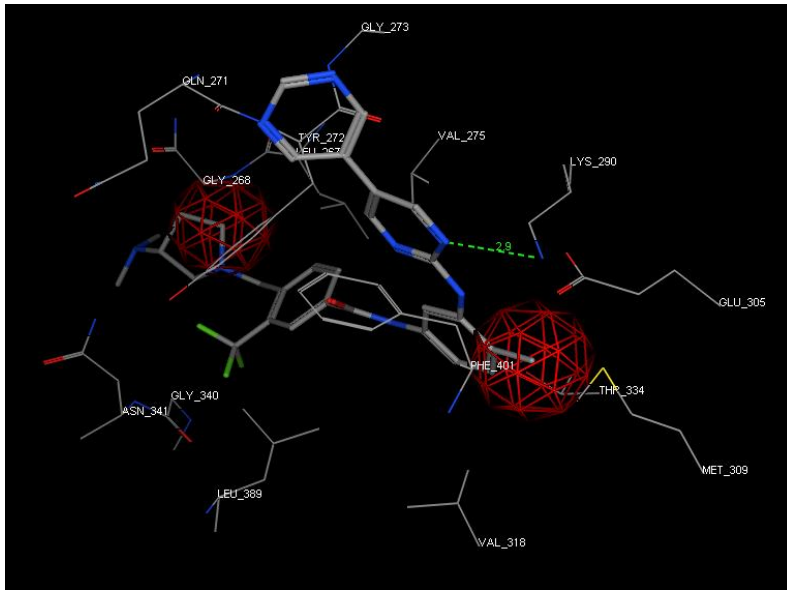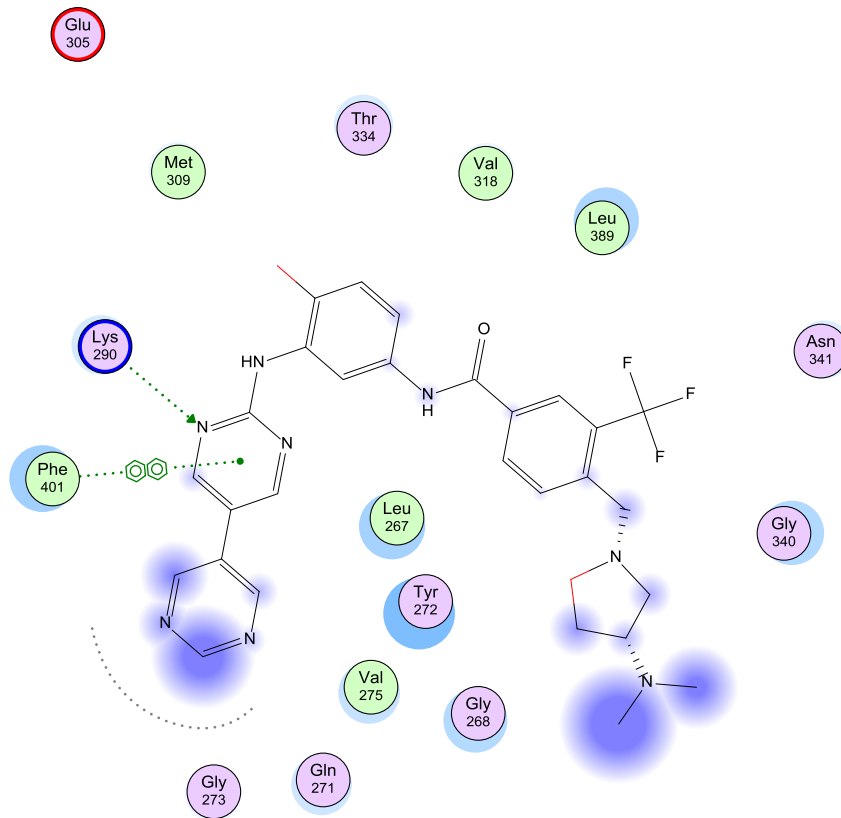

**Supplementary Figure S58.** Docking of p.(Tyr393\*) mutant ABL structure with Bafetinib.

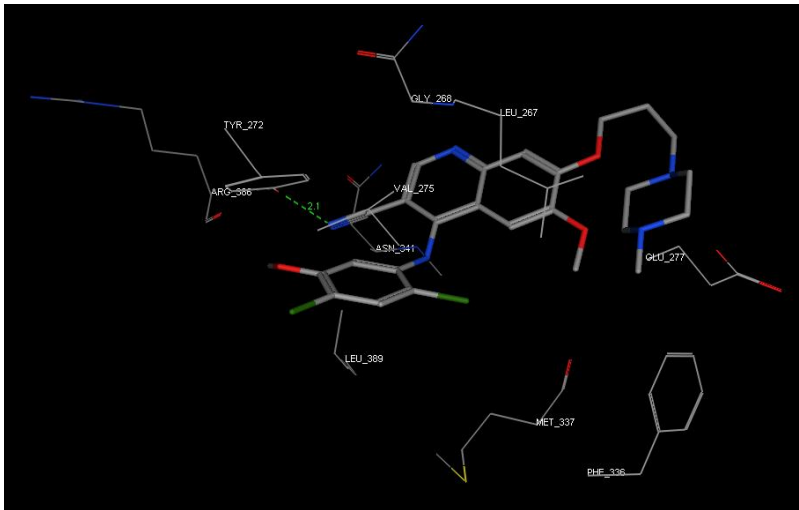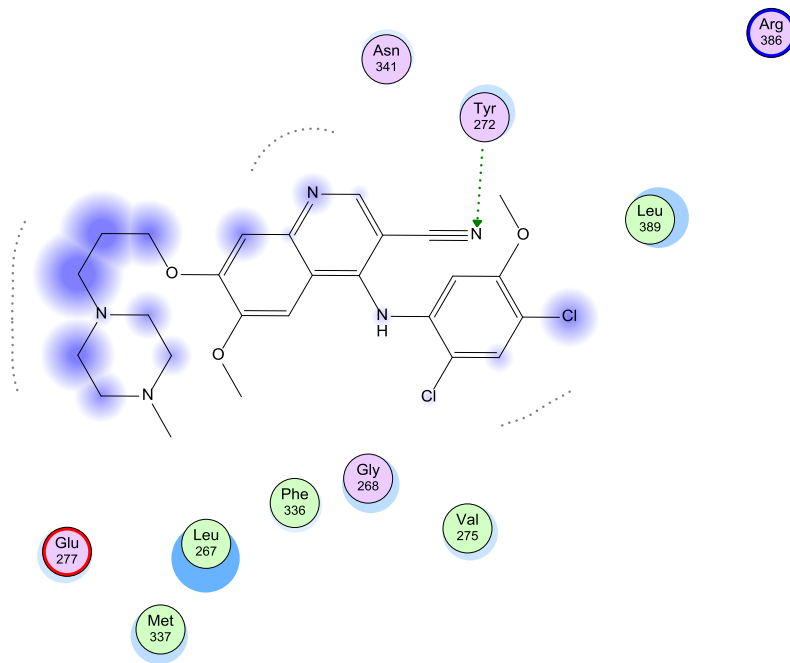

**Supplementary Figure S59.** Docking of p.(Tyr393\*) mutant ABL structure with Bosutinib.

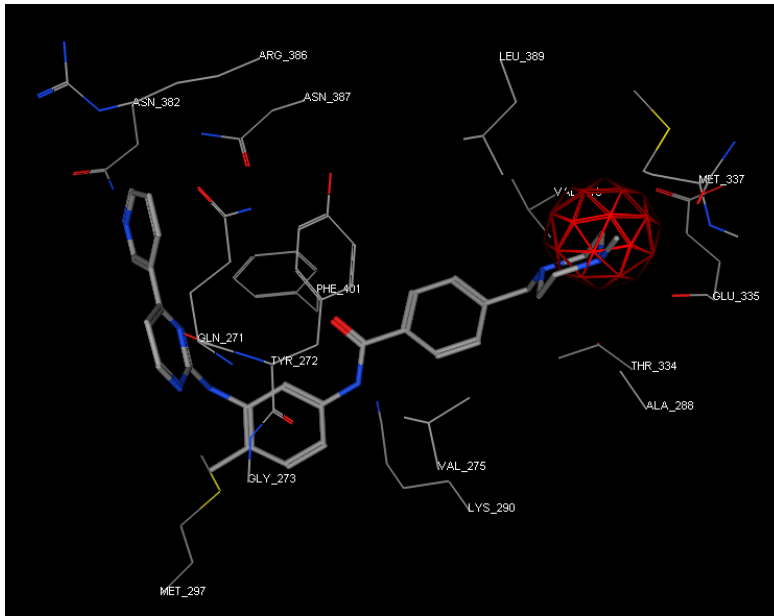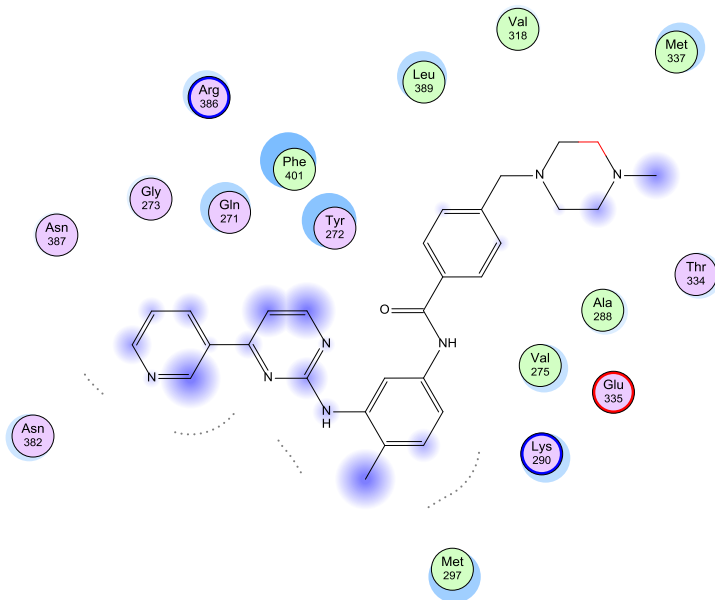

**Supplementary Figure S60.** Docking of p.(Tyr393\*) mutant ABL structure with Imatinib.



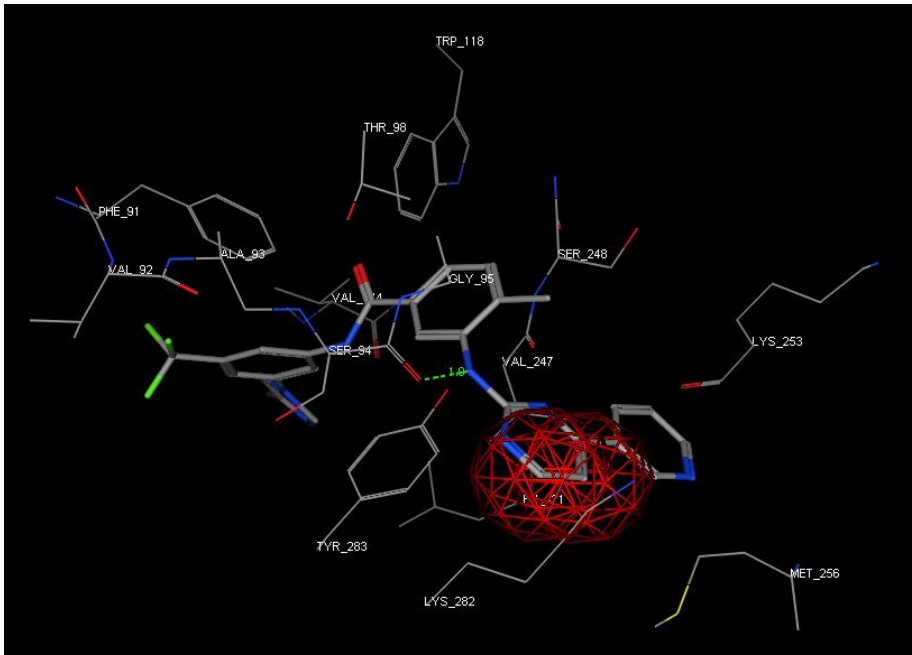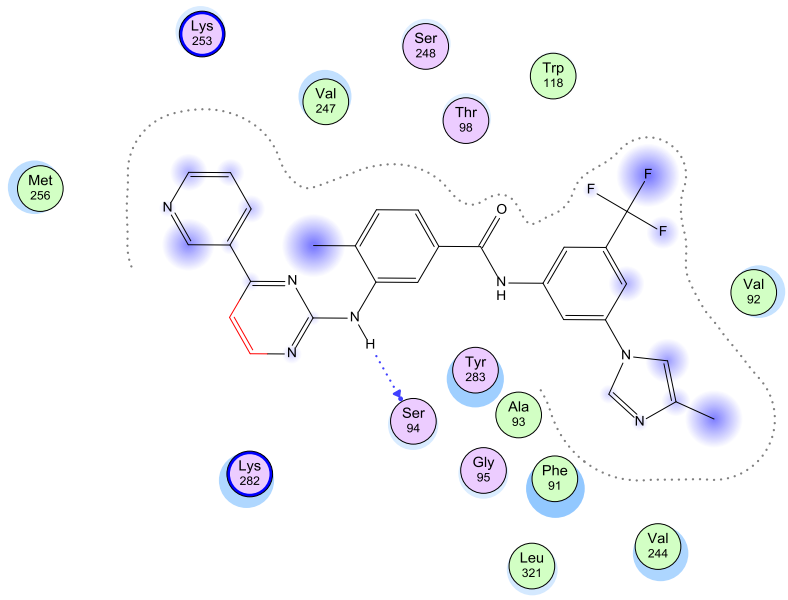

**Supplementary Figure S61.** Docking of p.(Val256Gly) mutant ABL structure with Nilotinib.

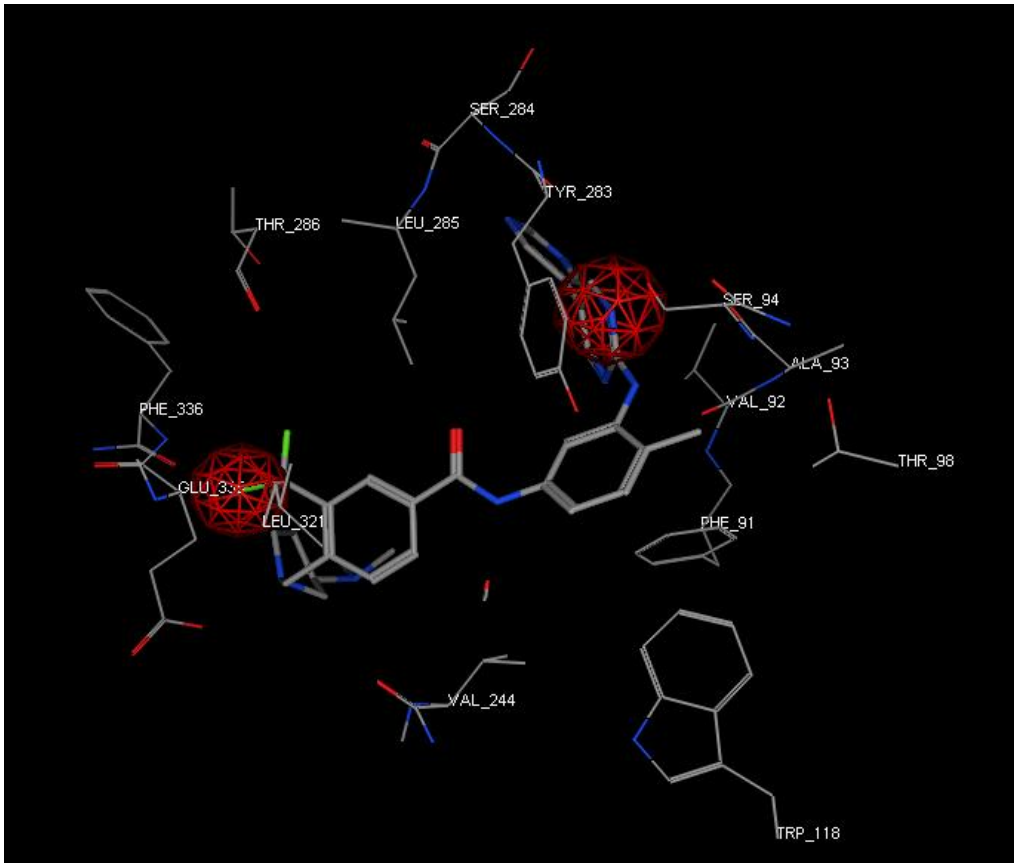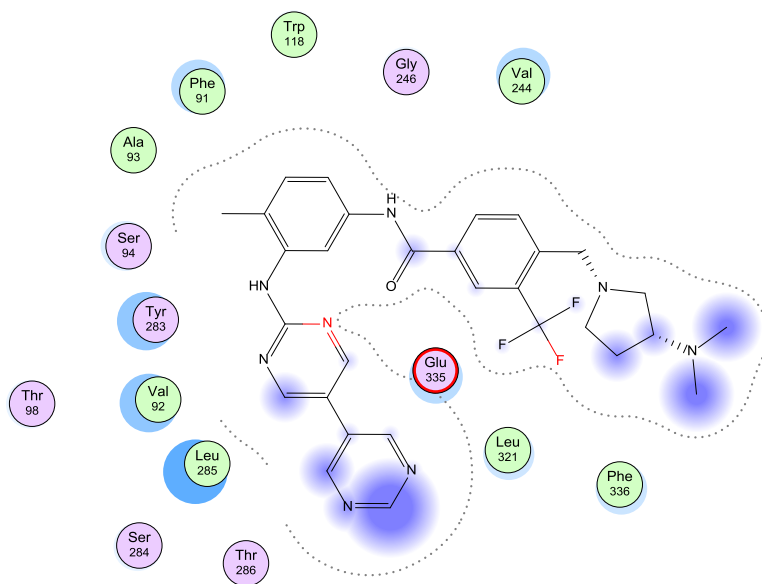

**Supplementary Figure S62.** Docking of p.(Val256Gly) mutant ABL structure with Bafetinib.

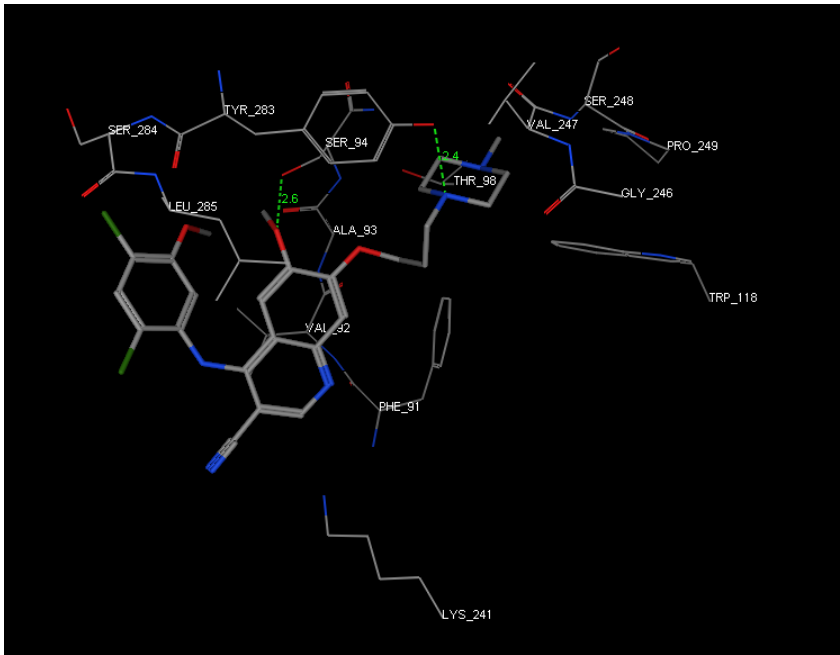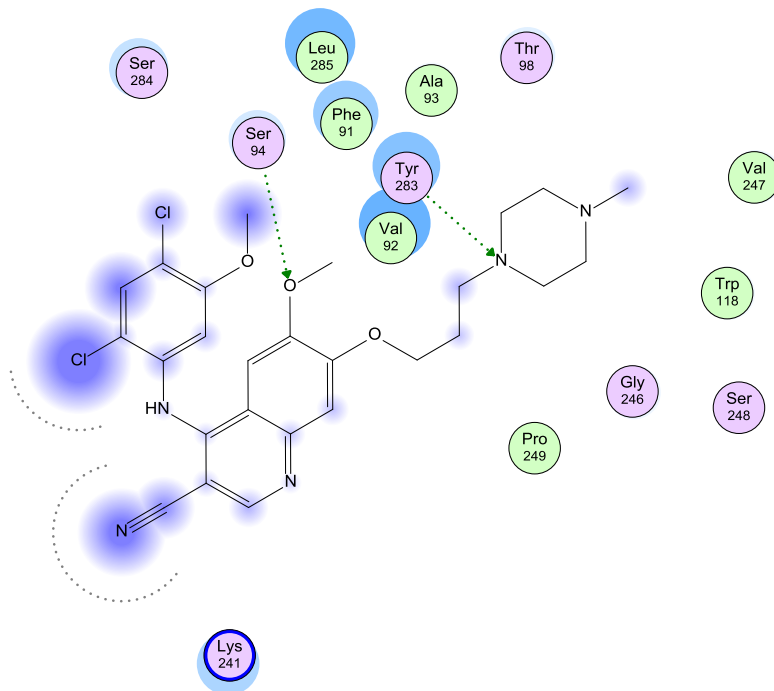

**Supplementary Figure S63.** Docking of p.(Val256Gly) mutant ABL structure with Bosutinib.

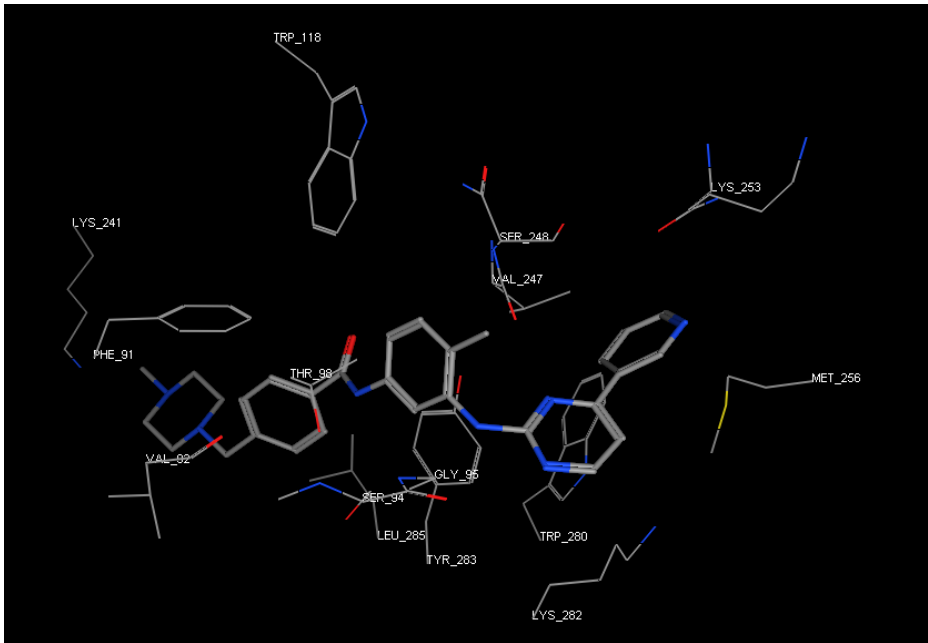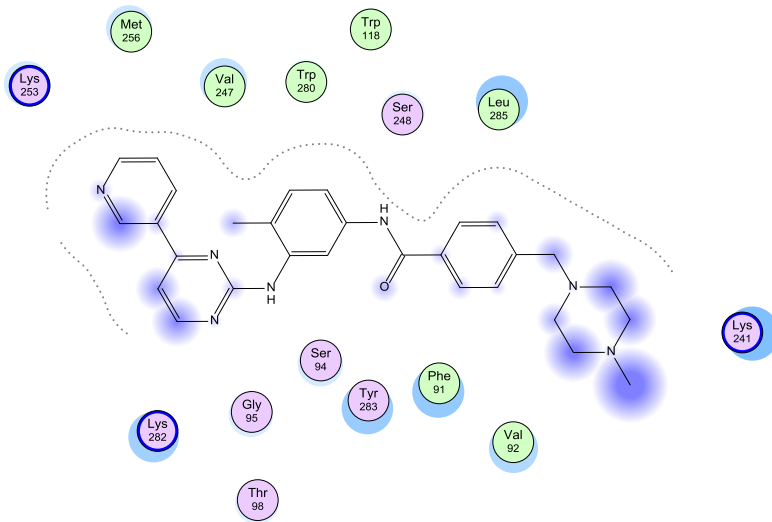

**Supplementary Figure S64.** Docking of p.(Val256Gly) mutant ABL structure with Imatinib.
